# Supplementary material for: Global burden of respiratory infections associated with seasonal influenza in children under 5 years in 2018: a systematic review and modelling study
Source: PubMed Central journal article supplement (PMC7083228; doi:10.1016/s2214-109x(19)30545-5), 2020-02-20
Supplement: mmc1.pdf [file mmc1.pdf]

# THE LANCET

## Global Health

### Supplementary appendix

This appendix formed part of the original submission and has been peer reviewed. We post it as supplied by the authors.

Supplement to: Wang X, Li Y, O'Brien KL, et al. Global burden of respiratory infections associated with seasonal influenza in children under 5 years in 2018: a systematic review and modelling study. *Lancet Glob Health* 2020; published online Feb 20. [http://dx.doi.org/10.1016/S2214-109X\(19\)30545-5](http://dx.doi.org/10.1016/S2214-109X(19)30545-5).

Supplementary material for “Global burden of respiratory infections associated with seasonal influenza in young children in 2018: a systematic review and modeling study”

## Case definitions and glossary

Community-based studies: studies where eligible cases are actively identified through regular visits to households. We considered studies conducted in outpatient departments or in the offices of general practitioners in industrialised countries as good proxies of community-based studies.

Hospital-based studies: studies where children are enrolled when they are admitted into hospital.

### Case definition for community-based studies

1. IFV-episodes: the entire spectrum of respiratory infections from influenza-like illness, ALRI, and severe ALRI AND laboratory confirmed IFV. Influenza-like illness was defined as sudden fever ( $>38$  deg C) and cough or sore throat and absence of other diagnosis.
2. IFV-associated ALRI: cough or difficulty breathing with increased respiratory rate for age (cut-offs same as in WHO Integrated Management of Childhood Illnesses [IMCI] case definition) AND laboratory confirmed IFV.
3. IFV-associated severe ALRI: for children aged 2-59 months, cough or difficulty in breathing with chest wall indrawing AND laboratory confirmed IFV; for children aged  $<2$  months, increased respiratory rate [RR] ( $>60$  breaths/ min) OR chest wall indrawing AND laboratory confirmed IFV.
4. IFV-associated very severe ALRI: cough or difficulty in breathing with any danger signs (cyanosis, difficulty in breastfeeding or drinking, vomiting everything, convulsions, lethargy, or unconsciousness, head nodding) AND laboratory confirmed IFV.

### Case definition for hospital-based studies

1. Hospitalised IFV-associated ALRI: all children with physician confirmed diagnosis of ALRI (pneumonia or bronchiolitis) that are hospitalised or recommended hospitalisation AND laboratory confirmed IFV.
2. Hospitalised IFV-associated ALRI with hypoxaemia: hospitalised ALRI cases with hypoxaemia (as defined below) AND laboratory confirmed IFV.
3. Hospitalised IFV-associated very severe ALRI: hospitalised ALRI with any danger signs (cyanosis, difficulty in breastfeeding or drinking, vomiting everything, convulsions, lethargy, or unconsciousness, head nodding) OR proxies for very severe disease – requiring mechanical ventilation OR ICU admission.
4. Hypoxaemia:  $SpO_2 < 90\%$  (at altitude  $\leq 2500$  m above sea level) in children aged 1-59 months and  $< 88\%$  for neonates;  $SpO_2 < 87\%$  (at altitude  $> 2500$  m above sea level) in children aged 1-59 months and  $< 85\%$  for neonates.

The relationship between the case definitions of different severity is displayed in Supplementary figure 1.

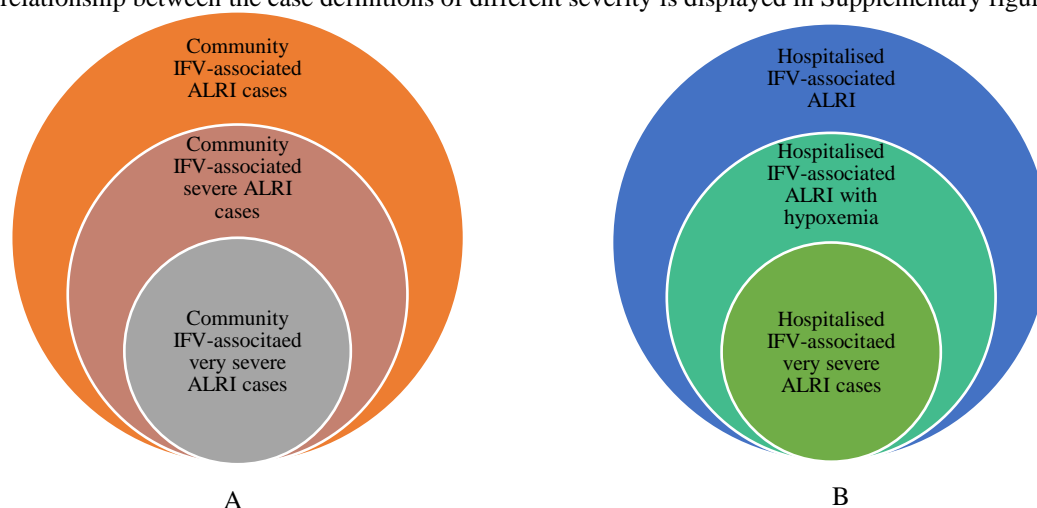

Supplementary figure 1: The relationship between community IFV-associated ALRI, IFV-associated severe ALRI, and IFV-associated very severe ALRI (A). The relationship between hospitalised IFV-associated IFV-ALRI, IFV-associated ALRI with hypoxemia, and IFV-associated very severe ALRI (B). The size of each circle is not proportionate to the number of cases for each severity.

**Glossary of terms and abbreviations.**

|                                                    |                                                                                                                                         |
|----------------------------------------------------|-----------------------------------------------------------------------------------------------------------------------------------------|
| IFV                                                | Influenza virus                                                                                                                         |
| ALRI                                               | Acute lower respiratory infection                                                                                                       |
| ILI                                                | Influenza-like-illness, defined as sudden fever (>38 deg C) and cough or sore throat and absence of other diagnosis                     |
| IFV-episodes (ALRI, severe ALRI, very severe ALRI) | Influenza-associated respiratory infections (specific definitions see above)                                                            |
| SARI                                               | Severe acute respiratory infection                                                                                                      |
| LICs, LMICs, UMICs, HICs                           | By World Bank Classification: low-income countries, lower middle-income countries, upper middle-income countries, high-income countries |
| hCFR                                               | In-hospital case-fatality ratio                                                                                                         |
| UR                                                 | Uncertainty range                                                                                                                       |
| RSV                                                | Respiratory syncytial virus                                                                                                             |
| SpO2                                               | Peripheral oxygen saturation                                                                                                            |
| ICU                                                | Intensive care unit                                                                                                                     |
| MV                                                 | Mechanical ventilation                                                                                                                  |
| IMCI                                               | Integrated Management of Childhood Illnesses                                                                                            |
| UNICEF                                             | United Nations International Children's Emergency Fund                                                                                  |
| WHO                                                | World Health Organisation                                                                                                               |
| UN                                                 | United Nations                                                                                                                          |
| HIV                                                | Human immunodeficiency virus                                                                                                            |
| PCV                                                | Pneumococcal conjugate vaccine                                                                                                          |
| INDEPTH                                            | The International Network for the Demographic Evaluation of Populations and their Health                                                |
| US                                                 | The United States of America                                                                                                            |
| AFE                                                | The attributable fraction among the exposed. Here we meant the attributable fraction for IFV-associated ALRI                            |
| GATHER                                             | the Guidelines for Accurate and Transparent Health Estimates Reporting                                                                  |
| IHME                                               | the Institute for Health Metrics and Evaluation                                                                                         |

## Search Strategy

### Medline (Ovid)

1. exp Influenza, Human/
2. exp Influenzavirus B/ or exp Influenzavirus A/ or exp Influenzavirus C/
3. \*Influenza Vaccines/ or \*Influenza A virus/ or \*Influenza, Human/ or \*Respiratory Tract Infections/ or \*Disease Outbreaks/ or \*Influenza A Virus, H1N1 Subtype/
4. H1N1pdm.mp
5. pH1N1.mp
6. 2009H1N1.mp
7. exp Bronchiolitis/ or exp Bronchiolitis, Viral/
8. exp Respiratory Tract Diseases/
9. exp Respiratory Tract Infections/ or acute respiratory infections.mp. or Influenza, Human/
10. exp Pneumonia, Viral/ or \*Pneumonia/ or acute lower respiratory infections.mp.
11. exp Incidence/
12. exp Prevalence/
13. exp Morbidity/
14. exp Child Mortality/ or exp Infant Mortality/ or \*Hospital Mortality/ or exp Mortality/
15. exp Death/ or exp "Cause of Death"/
16. pediatric mortality.mp
17. paediatric mortality.mp
18. pediatric death.mp.
19. paediatric death.mp.
20. burden.mp.
21. (1 or 2 or 3 or 4 or 5 or 6) and (7 or 8 or 9 or 10) and (11 or 12 or 13 or 14 or 15 or 16 or 17 or 18 or 19 or 20)
22. animals
23. 21 not 22
24. Limit 23 to (yr="2009-2018" and ("all infant (birth to 23 months)" or "preschool child (2 to 5 years)"))

### Embase (Ovid)

1. exp Influenza virus A/ or exp influenza/ or exp Influenza virus A H3N2/ or exp Influenza virus/ or exp Influenza virus A H1N1/ or exp Influenza virus B/
2. exp pandemic influenza/ or exp pandemic
3. influenza outbreak\*.mp
4. exp 2009 H1N1 influenza/ or 2009 H1N1.mp
5. H1N1pdm.mp
6. pH1N1.mp
7. exp respiratory tract infection/
8. exp lower respiratory tract infection/
9. exp virus pneumonia/ or exp pneumonia/
10. exp bronchiolitis/ or exp viral bronchiolitis/
11. exp incidence/
12. exp prevalence/
13. exp morbidity/
14. exp mortality/ or exp childhood mortality/ or exp infant mortality/
15. exp death/ or exp child death/
16. paediatric mortality.mp.
17. paediatric mortality.mp.
18. paediatric death.mp.
19. paediatric death.mp.
20. burden.mp.
21. (1 or 2 or 3 or 4 or 5 or 6) and (7 or 8 or 9 or 10) and (11 or 12 or 13 or 14 or 15 or 16 or 17 or 18 or 19 or 20)
22. animals
23. 21 not 22
24. Limit 23 to (yr="2009 -2018" and (infant or preschool child <1 to 6 years>))

### Global Health (Ovid)

1. exp influenza A/ or exp Influenza A virus/ or exp Influenza B virus/ or exp influenza viruses/ or exp swine influenza A viruses/ or exp swine influenza viruses/ or exp influenza B/ or exp influenza/
2. pandemic influenza.mp
3. 2009 H1N1.mp
4. H1N1pdm.mp
5. pH1N1.mp
6. influenza outbreak\*.mp
7. (respiratory diseases or lower respiratory tract infections).sh.
8. exp pneumonia/
9. bronchiolitis.mp.
10. exp incidence/
11. burden.mp.
12. exp morbidity/
13. exp infant mortality/ or exp mortality/
14. exp death/ or exp "causes of death"/
15. paediatric mortality.mp.
16. paediatric mortality.mp.
17. paediatric death.mp.
18. paediatric death.mp.
19. (1 or 2 or 3 or 4 or 5 or 6) and (7 or 8 or 9) and (10 or 11 or 12 or 13 or 14 or 15 or 16 or 17 or 18)
20. Limit 19 to yr="2009-2018"

#### **CINAHL**

1. (MH "Influenza, Humans+") OR (MH "Influenzavirus B+") OR (MH "Influenzavirus A+") OR (MM "Influenza, Pandemic (h1N1)2009")
  2. (MM "Bronchiolitis") OR (MM "Community-Acquired Pneumonia") OR (MM "Pneumonia, Viral") OR (MM "Influenza, Human")
  3. "children"
  4. 1 AND 2 AND 3
- Limiters: 2009-2018

#### **Web of Science**

TOPIC: influenza or 2009 H1N1 or H1N1pdm or pH1N1 AND TOPIC: children AND TOPIC: acute respiratory infection or pneumonia  
Time span= 2009-2018

#### **Global Index Medicus [including WHOLIS (KMS)]**

tw:((tw:(influenza) OR tw:(ph1n1) OR tw:(h1n1pdm) OR tw:(2009 h1n1)) AND (tw:(children))) AND (db:("WPRIM" OR "LILACS" OR "IMSEAR" OR "IMEMR" OR "WHOLIS") AND year\_cluster:("2009" OR "2010" OR "2011" OR "2012" OR "2013" OR "2014" OR "2015" OR "2016" OR "2017" OR "2018" ))

#### **Google**

children acute respiratory infections influenza  
H1N1pdm OR pH1N1 OR burden OR incidence OR mortality OR morbidity OR death  
-animal  
filetype:pdf

#### **CNKI (China Knowledge Resource Integrated Database)**

Topic: respiratory infection or respiratory tract infection or pneumonia or bronchiolitis  
AND Topic: influenza virus or H1N1 or pandemic influenza  
AND Topic: morbidity or mortality or disease burden or hospitalization  
AND Topic: children or infant  
From 1995 to Dec 31 2018.

#### **Wanfang Data**

Topic: respiratory infection or respiratory tract infection or pneumonia or bronchiolitis  
AND topic: influenza virus or H1N1 or pandemic influenza  
AND Topic: morbidity or mortality or disease burden or hospitalization  
AND Topic: children or infant  
From 1995 to Dec 31 2018.

**Chongqing VIP**

Title or key words: (children or infant)

AND (morbidity and mortality or mortality cases or hospitalization or disease burden)

AND (influenza virus or H1N1 or pandemic influenza)

AND (respiratory tract infection or respiratory infection or pneumonia or bronchiolitis or lung infection or severe pneumonia or infectious bronchiolitis)

AND (1995 to Dec 31 2018).

## No. of included studies by outcome

**Supplementary table 1: No. of included studies reporting incidence rates (n = 38)**

|                                             | No. of studies |          |                 |                      |
|---------------------------------------------|----------------|----------|-----------------|----------------------|
|                                             | IFV-episodes   | IFV-ALRI | IFV-severe ALRI | IFV-very severe ALRI |
| All                                         | 27             | 12       | 14              | 4                    |
| New                                         | 21             | 7        | 5               | 4                    |
| From RSV GEN                                | 9              | 10       | 12              | 4                    |
| Age group                                   |                |          |                 |                      |
| 0-5 months                                  | 10             | 5        | 12              | 4                    |
| 6-11 months                                 | 3              | 5        | 4               | 4                    |
| 12-59 months                                | 5              | 6        | 4               | 3                    |
| 0-59 months <sup>*</sup>                    | 18 (6)         | 12 (6)   | 7 (3)           | 4 (1)                |
| Developing countries                        | 14             | 8        | 14              | 4                    |
| World Bank income level <sup>†</sup>        |                |          |                 |                      |
| LICs                                        | 8              | 0        | 2               | 0                    |
| LMICs                                       | 5              | 7        | 11              | 3                    |
| UMICs                                       | 1              | 1        | 1               | 1                    |
| HICs                                        | 13             | 4        | 0               | 0                    |
| WHO region <sup>‡</sup>                     |                |          |                 |                      |
| AFR                                         | 5              | 1        | 2               | 1                    |
| AMR                                         | 4              | 2        | 1               | 1                    |
| EMR                                         | 0              | 1        | 3               | 0                    |
| EUR                                         | 5              | 2        | 0               | 0                    |
| SEAR                                        | 7              | 5        | 8               | 2                    |
| WPR                                         | 6              | 1        | 0               | 0                    |
| After the 2009 influenza pandemic           | 18             | 6        | 11              | 3                    |
| Quality assessment <sup>§</sup>             |                |          |                 |                      |
| Low risk of bias in study design            | 24             | 12       | 14              | 4                    |
| Low risk of bias in patient groups excluded | 20             | 8        | 14              | 4                    |
| Low risk of bias in case definition         | 10             | 9        | 9               | 4                    |
| Low risk of bias in sampling strategy       | 22             | 9        | 14              | 4                    |
| Low risk of bias in diagnostic test         | 23             | 11       | 12              | 3                    |

\* Data in the parenthesis were the numbers of imputed studies.

<sup>†</sup> LICs: low income countries; LMICs: lower-middle income countries; UMICs: upper-middle income countries; HICs: high income countries as per World Bank Classification.

<sup>‡</sup> AFR: WHO African region; AMR: WHO Region of the Americas; EMR: WHO Eastern Mediterranean region; EUR: WHO European region; SEAR: WHO South-East Asian region; WPR: WHO Western Pacific region.

<sup>§</sup> As specified in the quality assessment criteria.



**Supplementary table 2: No. of included studies reporting hospitalisation rates and hCFRs (n=122)\***

|                                                                                                    | No. of studies  |                                |                             |                          |
|----------------------------------------------------------------------------------------------------|-----------------|--------------------------------|-----------------------------|--------------------------|
|                                                                                                    | IFV-ALRI (N=96) | IFV-ALRI with hypoxemia (N=17) | IFV-very severe ALRI (N=31) | hCFRs of IFV-ALRI (N=66) |
| Reporting data for 0-59 months <sup>†</sup>                                                        | 91 (7)          | 17 (3)                         | 31 (3)                      | 59                       |
| Including data for three age groups <sup>‡</sup>                                                   | 59              | 13 <sup>§</sup>                | 24                          | 28                       |
| New studies                                                                                        | 45              | 13                             | 24                          | 28                       |
| From RSV GEN                                                                                       | 30              | 13                             | 22                          | 27                       |
| Developing countries                                                                               | 45              | 11                             | 18                          | 23                       |
| World Bank income level**                                                                          |                 |                                |                             |                          |
| LICs                                                                                               | 4               | 1                              | 2                           | 3                        |
| LMICs                                                                                              | 16              | 8                              | 8                           | 7                        |
| UMICs                                                                                              | 13              | 2                              | 6                           | 11                       |
| HICs                                                                                               | 26              | 2                              | 8                           | 7                        |
| WHO region <sup>††</sup>                                                                           |                 |                                |                             |                          |
| AFR                                                                                                | 14              | 5                              | 6                           | 11                       |
| AMR                                                                                                | 14              | 4                              | 7                           | 9                        |
| EMR                                                                                                | 1               | 0                              | 0                           | 0                        |
| EUR                                                                                                | 8               | 1                              | 4                           | 3                        |
| SEAR                                                                                               | 8               | 1                              | 4                           | 1                        |
| WPR                                                                                                | 14              | 1                              | 3                           | 2                        |
| After the 2009 pandemic period                                                                     | 30              | 9                              | 18                          | 23                       |
| Quality assessment <sup>‡‡</sup>                                                                   |                 |                                |                             |                          |
| Low risk of bias in study design                                                                   | 51              | 12                             | 21                          | 26                       |
| Adjustment for healthcare utilization                                                              | 49              | 11                             | 18                          | --                       |
| Low risk of bias in patient groups excluded                                                        | 53              | 10                             | 18                          | 22                       |
| Low risk of bias in case definition                                                                | 29              | 12                             | 21                          | 25                       |
| Low risk of bias in sampling strategy                                                              | 39              | 12                             | 19                          | 20                       |
| Low risk of bias in diagnostic test                                                                | 46              | 11                             | 19                          | --                       |
| Sampling strategy                                                                                  |                 |                                |                             |                          |
| Sampling ≥90% of eligible cases                                                                    | 29              | 7                              | 13                          | 17                       |
| Systematic sampling                                                                                | 10              | 0                              | 0                           | 3                        |
| Sampling <90% of eligible cases mainly because of refusal or discharged before specimen collection | 6               | 5                              | 7                           | 4                        |
| Sampling <90% of eligible cases with unknown reasons                                               | 2 <sup>§§</sup> | 1                              | 1                           | 2                        |
| Unknown proportion of sampling                                                                     | 12              | 0                              | 3                           | 2                        |

\* There were 59, 13, 24, and 28 studies reporting hospitalisation rates of IFV-(severe and very severe) ALRI and hCFRs. In the table, we only presented the number of studies reporting data for three age groups - 0-5 m, 6-11 m, 1-4 y unless stated otherwise.

<sup>†</sup> Data in parenthesis were the numbers of imputed studies.

<sup>‡</sup> 0-5 m, 6-11 m, 1-4 y.

<sup>§</sup> The 13 studies with age-stratified data were from developing countries. For industrialised countries, we estimated the hospitalisations using data that not stratified by age in 2 studies.

\*\* LICs: low income countries; LMICs: lower-middle income countries; UMICs: upper-middle income countries; HICs: high income countries as per World Bank Classification.

<sup>††</sup> AFR: WHO African region; AMR: WHO Region of the Americas; EMR: WHO Eastern Mediterranean region; EUR: WHO European region; SEAR: WHO South-East Asian region; WPR: WHO Western Pacific region.

<sup>‡‡</sup> As specified in the quality assessment criteria.

<sup>§§</sup> Including one study where testing was ordered by physicians; one study sampling <90% of eligible cases due to lack of resources.

## Assessment criteria

**Supplementary table 3: Assessment of risk of biases for community-based studies**

| Category                | Description                                                                                                                                                                                                                      | Risk of bias |
|-------------------------|----------------------------------------------------------------------------------------------------------------------------------------------------------------------------------------------------------------------------------|--------------|
| Study design            | Studies where the cases were prospectively enrolled                                                                                                                                                                              | Low          |
|                         | Other studies                                                                                                                                                                                                                    | High         |
| Patient groups excluded | No exclusions that may affect estimates                                                                                                                                                                                          | Low          |
|                         | Exclusions that may affect estimates, e.g., any of the following:<br>1. Not including very young children (e.g., neonates).<br>2. Excluding children with high-risk conditions.<br>3. Other exclusions that may affect estimates | High         |
| Case definition         | Using common/standard definitions                                                                                                                                                                                                | Low          |
|                         | Using non-standard/inconsistent definitions                                                                                                                                                                                      | High         |
| Sampling strategy       | The proportion of testing is available AND either of the following:<br>1. $\geq 90\%$ of eligible cases have been tested.<br>2. Testing a systematic sample of patients.                                                         | Low          |
|                         | $< 90\%$ of eligible cases have been tested<br>OR<br>The proportion of eligible cases who have been tested is unavailable.                                                                                                       | High         |
| Diagnostic test         | PCR or culture;<br>Or using other diagnostic tests, but confirming negative samples with PCR or culture                                                                                                                          | Low          |
|                         | 1. Other diagnostic tests, e.g., IFA, DFA.<br>2. No mention of diagnostic tests                                                                                                                                                  | High         |

**Supplementary table 4: Assessment of risk of biases for hospital-based studies**

| Category                                                                  | Description                                                                                                                                                                                                                      | Risk of bias |
|---------------------------------------------------------------------------|----------------------------------------------------------------------------------------------------------------------------------------------------------------------------------------------------------------------------------|--------------|
| Study design                                                              | Studies where the cases were prospectively enrolled                                                                                                                                                                              | Low          |
|                                                                           | Other studies                                                                                                                                                                                                                    | High         |
| Adjustment for health utilization (only for hospitalisation rate studies) | Meeting either of the following:<br>1. Including all or main hospitals;<br>2. Not including main hospitals, but adjusting for the proportion of patients admitted in the study hospitals                                         | Low          |
|                                                                           | Not including main hospitals OR no related description; AND no adjustment for the proportion of patients admitted in the study hospitals                                                                                         | High         |
| Patient groups excluded                                                   | No exclusions that may affect estimates                                                                                                                                                                                          | Low          |
|                                                                           | Exclusions that may affect estimates, e.g., any of the following:<br>1. Not including very young children (e.g., neonates).<br>2. Excluding children with high-risk conditions.<br>3. Other exclusions that may affect estimates | High         |
| Case definition                                                           | Using common/standard definitions                                                                                                                                                                                                | Low          |
|                                                                           | Using non-standard/inconsistent definitions                                                                                                                                                                                      | High         |
| Sampling strategy                                                         | The proportion of testing is available AND either of the following:<br>1. $\geq 90\%$ of eligible patients have been tested.<br>2. Testing a systematic sample of patients.                                                      | Low          |
|                                                                           | $< 90\%$ of eligible cases have been tested<br>OR<br>The proportion of eligible cases who have been tested is unavailable.                                                                                                       | High         |
| Diagnostic test (only for hospitalisation rate studies)                   | PCR or culture;<br>Or using other diagnostic tests, but confirming negative samples with PCR or culture                                                                                                                          | Low          |
|                                                                           | 1. Other diagnostic tests, e.g., IFA, DFA.<br>2. No mention of diagnostic tests                                                                                                                                                  | High         |
| Hypoxemia ascertainment (only for studies providing hypoxemia data)       | SpO <sub>2</sub> was recorded for all influenza-confirmed cases                                                                                                                                                                  | Low          |
|                                                                           | 1. SpO <sub>2</sub> was recorded for a proportion of influenza-confirmed cases.<br>2. No mention of how many influenza-confirmed cases have been assessed for hypoxemia.                                                         | High         |

## Details of sensitivity analyses

In Supplementary table 5, we estimated global hospitalisations and in-hospital mortality by summing up the estimates by country income group where available.

In Supplementary table 6, IFV-ALRI hospitalisations and in-hospital mortality were estimated based on the meta-estimates for 0-59 months. We further estimated hospital admissions and in-hospital mortality before 2009 and after the 2009 influenza pandemic period.

In Supplementary table 7-10, we estimated hospitalisations and in-hospital mortality by the risk of bias and by different settings. Analyses were conducted (1) in studies with low risk of bias in in sampling strategy; (2) in studies with low risk of bias in diagnostic test method (only for hospital admissions); (3) in studies with low overall risk of biases; (4) in studies after the 2009 influenza pandemic period. Moreover, stratified analyses were performed by PCV coverage, and by HIV burden in pregnant women. Data were classified into low ( $\leq 60\%$ , arbitrary cut-off) and high PCV coverage ( $>60\%$ ) based on the PCV coverage among general population per year per country<sup>1</sup>.

In Supplementary table 11, we estimated hospitalisations of IFV-ALRI with hypoxemia by excluding studies with high risk of bias in hypoxemia ascertainment.

In supplementary table 12, we reported burden estimates for 2015. In meta-regression analysis, we did not find significant difference in hospitalisation rates and hCFRs between studies before 2015 and studies during 2015-2018 (median study year: pre-2014 vs 2014 or later). So we applied the meta-estimates of all studies to the 2015 UN population estimates to yield 2015 estimates.

**Supplementary table 5: Global burden estimates by age group and by country income group in 2018**

|                                              | <b>0-5 m*</b>     | <b>6-11 m*</b>    | <b>12-59 m*</b>    | <b>0-59 m†</b>     |
|----------------------------------------------|-------------------|-------------------|--------------------|--------------------|
| Global hospitalisations of IFV-ALRI (*1,000) | 176 (101-311)     | 158 (83-311)      | 452 (248-858)      | 786 (432-1481)     |
| Global in-hospital deaths of IFV-ALRI        | 4500 (1000-24000) | 6000 (2500-17200) | 10300 (4300-24900) | 20800 (7800 65700) |

\* For each age group, global estimates were calculated by summing up the estimates by country income group; estimates by income strata were in main Table 2 and Table 3.

† Estimates in children younger than five years were calculated by summing up the estimates by three age groups (0-5 m, 6-11 m, and 12-59 m).

**Supplementary table 6: Sensitivity analyses of hospitalisation rate and hCFR meta-estimates for 0-59 months before and after 2009 influenza pandemic period, and global burden estimates in 2018**

|                                                            | Developing         | Industrialised | Global estimates   |
|------------------------------------------------------------|--------------------|----------------|--------------------|
| <b>IFV-ALRI hospital admissions (all studies)</b>          |                    |                |                    |
| No of studies                                              | 62 (3)             | 29 (4)         |                    |
| Rates (/1000)                                              | 1.3 (0.9-1.7)      | 0.8 (0.6-1.1)  |                    |
| Hospital admissions (*1000)                                | 775 (568-1056)     | 59 (45-78)     | 834 (613-1133)     |
| <b>IFV-ALRI hospital admissions (before 2009 pandemic)</b> |                    |                |                    |
| No of studies                                              | 16 (1)             | 19 (3)         |                    |
| Rates (/1000)                                              | 1.8 (1-3.6)        | 1.0 (0.8-1.2)  |                    |
| Hospital admissions (*1000)                                | 1095 (579-2070)    | 70 (57-85)     | 1164 (636-2155)    |
| <b>IFV-ALRI hospital admissions (after 2009 pandemic)</b>  |                    |                |                    |
| No of studies                                              | 52 (2)             | 12 (2)         |                    |
| Rates (/1000)                                              | 1.2 (0.9-1.7)      | 0.6 (0.4-1)    |                    |
| Hospital admissions (*1000)                                | 730 (532-1002)     | 42 (27-66)     | 772 (559-1067)     |
| <b>IFV-ALRI in-hospital deaths (all studies)</b>           |                    |                |                    |
| No of studies                                              | 43                 | 16             |                    |
| hCFR (%)                                                   | 1.9 (1.2-3.2)      | 0.5 (0.3-0.7)  |                    |
| Deaths                                                     | 15000 (8400-26600) | 300 (200-500)  | 15300 (8500-27100) |
| <b>IFV-ALRI in-hospital deaths (before 2009 pandemic)</b>  |                    |                |                    |
| No of studies                                              | 12                 | 7              |                    |
| hCFR (%)                                                   | 1.5 (0.6-3.9)      | 0.4 (0.2-0.7)  |                    |
| Deaths                                                     | 16400 (5300-49900) | 300 (100-500)  | 16700 (5400-50400) |
| <b>IFV-ALRI in-hospital deaths (after 2009 pandemic)</b>   |                    |                |                    |
| No of studies                                              | 35                 | 9              |                    |
| hCFR (%)                                                   | 2.0 (1.1-3.6)      | 0.5 (0.3-0.6)  |                    |
| Deaths                                                     | 14600 (7400-28300) | 200 (100-400)  | 14800 (7500-28700) |

**Supplementary table 7: Sensitivity analyses of IFV-ALRI hospitalisation rate meta-estimates by age group and by study quality, and global hospitalisations in 2018.**

|                                                                 | 0-5 m           |                   | 6-11 m |               | 12-59 m |               | Hospital admissions in 0-59 m |
|-----------------------------------------------------------------|-----------------|-------------------|--------|---------------|---------|---------------|-------------------------------|
|                                                                 | No <sup>*</sup> | Rate <sup>†</sup> | No     | Rate          | No      | Rate          |                               |
| <b>Main analysis - in all studies</b>                           |                 |                   |        |               |         |               |                               |
| Developing                                                      | 24              | 2.8 (1.8-4.3)     | 21     | 2.7 (1.7-4.3) | 35      | 0.9 (0.6-1.5) | 776 (494-1220)                |
| Industrialised                                                  | 11              | 3.7 (2.7-5.3)     | 7      | 2.6 (0.9-7.6) | 13      | 0.9 (0.4-1.8) | 94 (48-194)                   |
| Global                                                          |                 |                   |        |               |         |               | 870 (543-1415)                |
| <b>In studies with low risk of bias in sampling strategy</b>    |                 |                   |        |               |         |               |                               |
| Developing                                                      | 18              | 2.8 (1.6-4.8)     | 15     | 2.1 (1.2-3.7) | 27      | 0.8 (0.5-1.3) | 691 (390-1224)                |
| Industrialised                                                  | 6               | 3.8 (2.8-5.1)     | 4      | 2 (0.4-10.8)  | 6       | 1.1 (0.3-4)   | 102 (39-330)                  |
| Global                                                          |                 |                   |        |               |         |               | 793 (430-1553)                |
| <b>In studies with low risk of bias in test method</b>          |                 |                   |        |               |         |               |                               |
| Developing                                                      | 23              | 2.7 (1.7-4.3)     | 20     | 2.7 (1.6-4.5) | 32      | 0.9 (0.6-1.5) | 770 (482-1232)                |
| Industrialised                                                  | 5               | 4.9 (3-7.7)       | 3      | 2.2 (0.5-9.8) | 8       | 0.9 (0.5-1.5) | 100 (54-209)                  |
| Global                                                          |                 |                   |        |               |         |               | 870 (536-1441)                |
| <b>In studies with low risk of biases in &gt;=5 categories‡</b> |                 |                   |        |               |         |               |                               |
| Developing                                                      | 19              | 2.4 (1.4-4.1)     | 17     | 2.2 (1.3-3.9) | 28      | 0.8 (0.5-1.3) | 672 (407-1112)                |
| Industrialised                                                  | 3               | 3.8 (2.6-5.6)     | ..     | ..            | 2       | 0.5 (0.1-1.7) | ..                            |
| Global                                                          |                 |                   |        |               |         |               | ..                            |

\* No: number of studies.

† Rate: hospitalisation rate per 1,000 children per year.

‡ We assessed six domains for hospitalisation rate studies, and set the cut-off value of low risk of biases in five domains to include at least 75% of studies.

**Supplementary table 8: Sensitivity analysis of hospitalisation rate meta-estimates of IFV-ALRI by age group, and global hospitalisations in 2018.**

|                                                           | 0-5 m |               | 6-11 m |                | 12-59 m |               | Hospital admissions in 0-59 m |
|-----------------------------------------------------------|-------|---------------|--------|----------------|---------|---------------|-------------------------------|
|                                                           | No *  | Rate †        | No     | Rate           | No      | Rate          |                               |
| <b>Main analysis - in all studies</b>                     |       |               |        |                |         |               |                               |
| Developing                                                | 24    | 2.8 (1.8-4.3) | 21     | 2.7 (1.7-4.3)  | 35      | 0.9 (0.6-1.5) | 776 (494-1220)                |
| Industrialised                                            | 11    | 3.7 (2.7-5.3) | 7      | 2.6 (0.9-7.6)  | 13      | 0.9 (0.4-1.8) | 94 (48-194)                   |
| Global                                                    |       |               |        |                |         |               | 870 (543-1415)                |
| <b>In studies providing data for all three age groups</b> |       |               |        |                |         |               |                               |
| Developing                                                | 19    | 2.5 (1.4-4.3) | 19     | 2.7 (1.6-4.6)  | 19      | 1 (0.5-1.9)   | 806 (437-1494)                |
| Industrialised                                            | 5     | 4.5 (2.5-8.1) | 5      | 1.9 (0.7-5.4)  | 5       | 0.8 (0.3-1.9) | 89 (40-205)                   |
| Global                                                    |       |               |        |                |         |               | 895 (477-1698)                |
| <b>After the 2009 pandemic period</b>                     |       |               |        |                |         |               |                               |
| Developing                                                | 20    | 3 (1.8-4.9)   | 17     | 2.8 (1.6-5)    | 27      | 0.8 (0.5-1.5) | 746 (436-1280)                |
| Industrialised                                            | 4     | 2.8 (1.2-6.5) | 3      | 1.8 (0.4-9)    | 4       | 0.6 (0.2-1.9) | 65 (22-207)                   |
| Global                                                    |       |               |        |                |         |               | 812 (458-1487)                |
| <b>By HIV burden<sup>2</sup></b>                          |       |               |        |                |         |               |                               |
| Developing - Global plan priority countries               | 12    | 2.0 (1.2-3.4) | 11     | 1.9 (1.5-2.5)  | 12      | 0.5 (0.4-0.8) | 201 (140-291)                 |
| Developing – other countries                              | 12    | 3.7 (2.0-7.0) | 10     | 3 (1.3-7.3)    | 23      | 1.2 (0.6-2.3) | 583 (292-1169)                |
| Industrialised                                            | 11    | 3.7 (2.7-5.3) | 7      | 2.6 (0.9-7.6)  | 13      | 0.9 (0.4-1.8) | 94 (48-194)                   |
| Global                                                    |       |               |        |                |         |               | 877 (481-1655)                |
| <b>By PCV coverage<sup>‡1</sup></b>                       |       |               |        |                |         |               |                               |
| Developing countries                                      |       |               |        |                |         |               |                               |
| PCV >60%                                                  | 11    | 1.5 (0.9-2.5) | 10     | 1.2 (0.8-1.9)  | 18      | 0.6 (0.4-1.0) | 220 (138-351)                 |
| PCV ≤60%                                                  | 18    | 2.5 (1.5-4.2) | 16     | 2.6 (1.4-4.7)  | 22      | 1.2 (0.6-2.3) | 539 (289-1009)                |
| <b>Subtotal in developing countries</b>                   |       |               |        |                |         |               | 759 (428-1360)                |
| Industrialised countries                                  |       |               |        |                |         |               |                               |
| PCV >60%                                                  | 3     | 2.6 (0.9-7.1) | 2      | 2.4 (0.3-17.2) | 3       | 0.8 (0.2-3.1) | 76 (19-335)                   |
| PCV ≤60%                                                  | 10    | 3.4 (2.5-4.5) | 6      | 1.6 (0.5-4.9)  | 11      | 0.9 (0.4-1.9) | 12 (6-26)                     |
| <b>Subtotal in industrialised countries</b>               |       |               |        |                |         |               | 88 (25-361)                   |
| <b>Global</b>                                             |       |               |        |                |         |               | 847 (453-1720)                |

\* No: number of studies.

† Rate: hospitalisation rate per 1,000 children per year.

‡ The cut-off value was arbitrarily chosen.



**Supplementary table 9: Sensitivity analyses of IFV-ALRI in-hospital case fatality ratio (hCFR) meta-estimates by age group and by study quality, and global burden estimates in 2018.**

|                                                                            | 0-5 m |               | 6-11 m         |               | 12-59 m |               | Global in-hospital mortality in 0-59 m |
|----------------------------------------------------------------------------|-------|---------------|----------------|---------------|---------|---------------|----------------------------------------|
|                                                                            | No *  | hCFR (%)      | No             | hCFR (%)      | No      | hCFR (%)      |                                        |
| <b>Main analysis - in all studies reporting by three age groups</b>        |       |               |                |               |         |               |                                        |
| Developing                                                                 | 23    | 3.1 (1.3-6.9) | 23             | 2 (0.6-6.2)   | 23      | 1.4 (0.7-2.8) | 14800 (5700-39000)                     |
| Industrialised                                                             | 5     | 0.3 (0-6.9)   | 5              | 0.9 (0.2-3.4) | 5       | 0.4 (0.1-2.7) | 500 (100-4800)                         |
| Global                                                                     |       |               |                |               |         |               | 15300 (5800-43800)                     |
| <b>In studies with low risk of bias in sampling strategy</b>               |       |               |                |               |         |               |                                        |
| Developing                                                                 | 18    | 3.5 (1.5-8)   | 18             | 2.8 (0.9-8.3) | 18      | 2.3 (1.3-4.1) | 18700 (7300-48300)                     |
| Industrialised                                                             | 2     | ..            | 2 <sup>†</sup> | ..            | 2       | 0.8 (0-26.4)  | ..                                     |
| Global                                                                     |       |               |                |               |         |               | ..                                     |
| <b>In studies with low risk of biases in &gt;=3 categories<sup>‡</sup></b> |       |               |                |               |         |               |                                        |
| Developing                                                                 | 22    | 3.5 (1.6-7.6) | 22             | 2.9 (1.1-7.5) | 22      | 2.2 (1.3-3.6) | 17700 (7600-41700)                     |
| Industrialised                                                             | 2     | ..            | 2 <sup>†</sup> | ..            | 2       | 0.8 (0-26.4)  | ..                                     |
| Global                                                                     |       |               |                |               |         |               | ..                                     |

\* No: number of studies.

<sup>†</sup> Both studies reported zero IFV-ALRI death.

<sup>‡</sup> We assessed four domains for hCFR studies, and set the cut-off value of low risk of biases in three domains to include at least 75% of studies.

**Supplementary table 10: Sensitivity analyses of IFV-ALRI in-hospital case fatality ratio (hCFR) meta-estimates by age group, and global burden estimates in 2018.**

|                                                                     | 0-5 m |                | 6-11 m |                | 12-59 m |               | In-hospital mortality in 0-59 m |
|---------------------------------------------------------------------|-------|----------------|--------|----------------|---------|---------------|---------------------------------|
|                                                                     | No *  | hCFR (%)       | No     | hCFR (%)       | No      | hCFR (%)      |                                 |
| <b>Main analysis - in all studies reporting by three age groups</b> |       |                |        |                |         |               |                                 |
| Developing                                                          | 23    | 3.1 (1.3-6.9)  | 23     | 2 (0.6-6.2)    | 23      | 1.4 (0.7-2.8) | 14700 (5600-38700)              |
| Industrialised                                                      | 5     | 0.3 (0-6.9)    | 5      | 0.9 (0.2-3.4)  | 5       | 0.4 (0.1-2.7) | 400 (100-4700)                  |
| Global                                                              |       |                |        |                |         |               | 15100 (5700-43300)              |
| <b>After the 2009 pandemic period</b>                               |       |                |        |                |         |               |                                 |
| Developing                                                          | 22    | 3.5 (1.5-8.1)  | 22     | 1.9 (0.5-6.9)  | 2       | 1.4 (0.6-3.1) | 15200 5200-44900)               |
| Industrialised                                                      | 5     | 0.3 (0-6.9)    | 5      | 0.9 (0.2-3.4)  | 5       | 0.4 (0.1-2.7) | 300 (0-4100)                    |
| Global                                                              |       |                |        |                |         |               | 15500 (5300-49000)              |
| <b>By HIV burden<sup>2</sup></b>                                    |       |                |        |                |         |               |                                 |
| Developing - Global plan priority countries                         | 11    | 3.2 (1.2-8.7)  | 11     | 2.8 (0.9-8.9)  | 11      | 2.1 (1.1-4.2) | 5100 (2000-13700)               |
| Developing – other countries                                        | 12    | 2.8 (0.7-10.9) | 12     | 1.0 (0.1-12.3) | 12      | 1.0 (0.3-3.1) | 8200 (1800-42900)               |
| Industrialised                                                      | 5     | 0.3 (0-6.9)    | 5      | 0.9 (0.2-3.4)  | 5       | 0.4 (0.1-2.7) | 500 (100-4800)                  |
| Global                                                              |       |                |        |                |         |               | 13800 (3800-61600)              |
| <b>By PCV coverage<sup>†1</sup></b>                                 |       |                |        |                |         |               |                                 |
| Developing countries                                                |       |                |        |                |         |               |                                 |
| PCV <=60%                                                           | 18    | 2.5 (0.5-11.5) | 18     | 3.4 (1.2-9.0)  | 18      | 1.3 (0.4-3.9) | 10600 (4200-40900)              |
| PCV >60%                                                            | 15    | 2.9 (1.0-8.0)  | 15     | 1.4 (0.2-8.8)  | 15      | 1.8 (0.7-4.8) | 4300 (1300-15100)               |
| <b>Subtotal in developing countries</b>                             |       |                |        |                |         |               | 14900 (4100-55700)              |
| Industrialised countries                                            |       |                |        |                |         |               |                                 |
| PCV <=60%                                                           | 2     | 2.0 (0.3-12.6) | 2      | ..             | 2       | 1.0 (0-23.9)  | ..                              |
| PCV >60%                                                            | 3     | ..             | 3      | 1.0 (0.2-3.8)  | 3       | 0.3 (0-2.5)   | ..                              |
| <b>Subtotal in industrialised countries</b>                         |       |                |        |                |         |               | ..                              |
| <b>Global</b>                                                       |       |                |        |                |         |               | ..                              |

\* No: number of studies.

† The cut-off value was arbitrarily chosen.

**Supplementary table 11: Sensitivity analyses of hospitalisation rate meta-estimates of IFV-ALRI with hypoxemia by age group, and global burden estimates in 2018.**

|                                                                    | 0-5 m |               | 6-11 m |               | 12-59 m |               | Hospital admissions of IFV-ALRI with hypoxemia in 0-59 m |
|--------------------------------------------------------------------|-------|---------------|--------|---------------|---------|---------------|----------------------------------------------------------|
|                                                                    | No *  | Rate†         | No     | Rate          | No      | Rate          |                                                          |
| <b>Main analysis – in studies with data for three age bands</b>    |       |               |        |               |         |               |                                                          |
| Developing                                                         | 10    | 0.9 (0.6-1.4) | 10     | 0.8 (0.5-1.1) | 9       | 0.2 (0.1-0.3) | 202 (126-326)                                            |
| Industrialised                                                     |       | ..            |        | ..            | 2       | 0 (0-1.1)     | ..                                                       |
| Global                                                             |       |               |        |               |         |               | ..                                                       |
| <b>In studies with low risk of bias in hypoxemia ascertainment</b> |       |               |        |               |         |               |                                                          |
| Developing                                                         | 7     | 1.0 (0.6-1.6) | 7      | 0.8 (0.4-1.5) | 7       | 0.2 (0.1-0.4) | 208 (125-358)                                            |
| Industrialised                                                     |       | ..            |        | ..            |         | ..            | ..                                                       |
| Global                                                             |       |               |        |               |         |               | ..                                                       |
| <b>In studies reporting data by three age bands</b>                |       |               |        |               |         |               |                                                          |
| Developing                                                         | 8     | 1 (0.6-1.6)   | 8      | 0.8 (0.6-1.0) | 8       | 0.2 (0.1-0.4) | 206 (111-386)                                            |
| Industrialised                                                     |       | ..            |        | ..            |         | ..            | ..                                                       |
| Global                                                             |       |               |        |               |         |               | ..                                                       |

\* No: number of studies.

† Rate: hospitalisation rate per 1,000 children per year.

**Supplementary table 12: Global burden estimates by age group and by country income group in 2015**

|                                          | 0-5 m*                   | 6-11 m*              | 12-59 m*             | 0-59 m†                   |
|------------------------------------------|--------------------------|----------------------|----------------------|---------------------------|
| Hospitalisations of IFV-ALRI<br>(*1,000) |                          |                      |                      |                           |
| Developing                               | 172 (112–266)            | 166 (105–264)        | 430 (273–678)        | 768 (489–1,207)           |
| Industrialised                           | 25 (18–35)               | 18 (6–51)            | 51 (24–107)          | 93 (48–193)               |
| Global estimates                         | 197 (130–301)            | 184 (111–315)        | 480 (296–785)        | 861 (537–1,400)           |
| In-hospital deaths of IFV-ALRI           |                          |                      |                      |                           |
| Developing                               | 5,300 (2,100–<br>13,500) | 3,300 (900–11,500)   | 6,000 (2,600–13,600) | 14,700 (5,600–<br>38,700) |
| Industrialised                           | 100 (0–2,800)            | 200 (0–900)          | 200 (0–1,200)        | 400 (100–4,700)           |
| Global estimates                         | 5,400 (2,100–<br>16,100) | 3,500 (1,000–12,400) | 6,200 (2,600–14,800) | 15,100 (5,700–<br>43,300) |

\* For each age group, global estimates were calculated by summing up the estimates by country development status; rates by age and by region are available in main Table 2 and Table 3. 2015 UN population estimates were used.

† Estimates in children younger than five years were calculated by summing up the estimates by three age groups (0-5 m, 6-11 m, and 12-59 m). For hospitalisations of IFV-ALRI with hypoxemia,

## Details of overall mortality estimation

We estimated overall IFV-ALRI deaths by applying the inflation factor (factor of overall IFV-ALRI deaths versus in-hospital deaths) to the robust IFV-ALRI in-hospital mortality estimates.

The details about inflation factor estimation in industrialised countries are in the main text. For developing countries, we invited investigators from the INDEPTH Network to provide two types of data: (1) population-based pneumonia deaths and local concurrent influenza circulation data from severe acute respiratory infection (SARI) surveillance, both reported on a monthly basis; (2) the numbers of pneumonia deaths occurring in- and out-of-hospital for the same observation period, separately. For the (1) type data, we requested the number of pneumonia deaths to be at least 60 over three consecutive years. In addition to the INDEPTH Network, we identified one study in Bangladesh in RSV GEN with eligible (1) type data. So altogether we identified six sites in developing countries with relevant data. The inflation factor was estimated using three different approaches in developing countries. Here we listed the details for each approach.

Approach 1 (main analysis) - we divided the overall pneumonia deaths by in-hospital pneumonia deaths, and used the median value across countries to represent the inflation factor for IFV-specific ALRI deaths as in Supplementary table 13. Using this approach, we assumed that the relative contribution of influenza in ALRI deaths was the same for the hospitalised deaths and those not hospitalised.

**Supplementary table 13: Approach 1 - Inflation factor for IFV-ALRI mortality in developing countries, and overall IFV-ALRI mortality among children under five years**

|                       | Site                                    | Ratio of in- and out-of-hospital pneumonia deaths over in-hospital deaths in children under five years | Inflation factor (average ratio) | Overall IFV-ALRI mortality |
|-----------------------|-----------------------------------------|--------------------------------------------------------------------------------------------------------|----------------------------------|----------------------------|
| <b>Developing</b>     | Nairobi, Kenya (urban)                  | 1.7                                                                                                    | 2.3                              | 34100 (UR<br>13100 89700)  |
|                       | Siaya, Kenya (rural)                    | 3.5                                                                                                    |                                  |                            |
|                       | Nouna, Burkina Faso (rural)             | 1.5                                                                                                    |                                  |                            |
|                       | Dodowa, Ghana (rural)                   | 2.1                                                                                                    |                                  |                            |
|                       | Manhiça, Mozambique (peri-urban, rural) | 2.8                                                                                                    |                                  |                            |
|                       | Agincourt, South Africa (rural)         | 2.3                                                                                                    |                                  |                            |
| <b>Industrialised</b> | USA                                     | 1.6                                                                                                    | 1.6                              | 700 (100-7700)             |
| <b>Global</b>         |                                         |                                                                                                        |                                  | 34800 (13200-97200)        |

Approach 2 and 3 shared a same strategy in applying (c) the proportion of IFV-ALRI deaths among all-cause ALRI deaths to (d) national all-cause pneumonia deaths, and then divided by (f) the national IFV-ALRI in-hospital deaths, to back calculate the inflation factor. (f) The national IFV-ALRI in-hospital deaths, were estimated using the location-matched hospitalisation rate and hCFR data (site-matched data in Siaya, Kenya; Manhiça, Mozambique; country-matched data in South Africa). For Bangladesh, we used the hCFR meta-estimate in developing countries because site- or country-matched data were unavailable (Supplementary table 13-15).

For Approach 2 and 3, our first step was to estimate the IFV-ALRI in-hospital deaths using population in 2015 (U5 population), the hospitalisation rate (U5 Hos Rate), and hCFR (U5 hCFR) per country for 0-59 months where available. For countries the hospitalisation rates and hCFRs were unavailable, we applied the meta-estimates in developing countries to the country-specific population (Supplementary table 14).

$$\text{Country IFV-ALRI in-hospital deaths} = \text{U5 population} * \text{U5 Hos Rate} * \text{U5 hCFR}$$

**Approach 2** - the excess mortality approach depends on well-defined influenza seasons. A notable difference between Approach 2 and 3 was that different methods were used to estimate (c) the proportion of IFV-ALRI deaths among all-cause deaths. Approach 2 was similar to the previous model we have used wherein the excess pneumonia deaths during influenza season was attributed to influenza. Whenever there is an overlap between influenza and RSV season, we proportionately attributed excess pneumonia deaths within influenza season to the two pathogens. Assumptions included (1) the association of influenza with pneumonia deaths was not

confounded by other pathogens; (2) for IFV and RSV, the degree of association between the virus activity and the number of pneumonia deaths caused by the viruses was same. IFV (RSV) season was defined as at least 10 samples were tested and at least 10% of tested samples were positive. There are no clear influenza seasons in the two sites in Bangladesh and Kenya, so we are unable to estimate the inflation factor using this approach. The impact of influenza or any pathogen varies across years. We may observe negative excess pneumonia deaths with the IFV season in a specific year when other pathogens circulate outside IFV and RSV seasons, and cause more pneumonia deaths. Therefore, to account for this, and to estimate the average annual impact of seasonal IFV on pneumonia deaths, the negative excess deaths for one particular year were not set to zero. With the IFV-ALRI in-hospital deaths, we estimated the inflation factor as in Supplementary table 15.

**Supplementary table 14: In-hospital deaths data and population-based pneumonia deaths data by site**

| Site and period (population-based pneumonia deaths and IFV activity) | Site and period (in-hospital IFV-ALRI deaths) (f)                     |
|----------------------------------------------------------------------|-----------------------------------------------------------------------|
| Nairobi (Kenya), 2008, 2010-2015                                     | Siaya (Kenya), 2010-2014                                              |
| Siaya (Kenya), 2010-2016                                             | Siaya (Kenya), 2010-2014                                              |
| Bangladesh, 2010-2012                                                | Meta-estimates in developing countries                                |
| Manhiça, Mozambique, 2012-2016 <sup>*3</sup>                         | Manhiça, Mozambique, 2011-2014                                        |
| Agincourt, South Africa, 2010-2015                                   | Paarl, Soweto, Klerksdorp, Pietermaritzburg, 2010-; Soweto, 1998-2005 |

\* Local IFV and RSV activity data in Manhiça, Mozambique were available during Jan 2012-June 2014, but unavailable during July 2014-Dec 2016. For IFV, we used the data in neighbouring areas (distance <100 kilometres). For RSV, the average proportions of RSV during Jan 2012-Dec 2013 were extrapolated to Jan-Dec 2014.

**Supplementary table 15: Approach 2 - Inflation factor for IFV-ALRI mortality in developing countries, and overall IFV-ALRI mortality among children under five years**

| Year            | Country         | IFV-PNE death at the site (a) | PNE death at the site (b) | Proportion of IFV-PNE deaths (c=a/b, %) | 2015 U5 PNE deaths (d) <sup>4</sup> | Overall IFV-ALRI deaths (e = d*c) | IFV-ALRI in-hospital deaths (f) | Inflation factor (h = e/f) | Average inflation factor | Global overall IFV-ALRI mortality* |
|-----------------|-----------------|-------------------------------|---------------------------|-----------------------------------------|-------------------------------------|-----------------------------------|---------------------------------|----------------------------|--------------------------|------------------------------------|
| 2010-2012       | Bangladesh      | -33.2                         | 208                       | --                                      | 17408                               | --                                | 361                             | --                         |                          |                                    |
| 2010-2015       | South Africa    | 4.6                           | 125                       | 3.7                                     | 7105                                | 264                               | 98                              | 2.7                        |                          |                                    |
| 2012-2016       | Mozambique      | 4.5                           | 151                       | 3.0                                     | 11769                               | 351                               | 104                             | 3.4                        | 3.0                      | 45200 (UR                          |
| 2008; 2010-2015 | Kenya (Nairobi) | -13.5                         | 244                       | --                                      | 10584                               | --                                | 142                             | --                         |                          | 17200-                             |
| 2010-2016       | Kenya (Siaya)   | 50.1                          | 1261                      | 4.0                                     | 10584                               | 421                               | 142                             | 3.0                        |                          | 124500)                            |

\* Estimated by summing up overall mortality in developing (inflation factor = 3.0) and industrialised countries (inflation factor = 1.6)

**Approach 3** - we adopted a new methodology. In this approach, we considered that the number of IFV-ALRI deaths was associated with the influenza activity (i.e., the proportion of IFV in ALRI cases), the risk of dying from IFV-ALRI compared with the risk of dying for non-IFV-ALRI, and the number of ALRI deaths. Influenza activity and ALRI deaths can vary across months through a year. Thus, the number of IFV-ALRI deaths could be estimated by combining the proportion of IFV in ALRI cases, ALRI deaths, and the risk of dying from IFV-ALRI on a monthly basis. We considered that the risk of dying from IFV-ALRI was constant through a year.

So to estimate (c) the proportion of IFV-ALRI deaths among ALRI deaths, specifically we combined (1) the monthly proportion of IFV in SARI cases, (2) monthly pneumonia deaths; (3) the risk of dying from IFV compared with non-IFV-ALRI - the ratio of hCFR of IFV-ALRI deaths over non-IFV-ALRI deaths. The samples at the sites were mostly from children under five years with SARI in local surveillance, we considered that the proportion of IFV in these samples was a reasonable proxy of that in pneumonia cases. Based on eight hospital-based studies in developing countries, we estimated that the hCFR of IFV-ALRI was lower compared with non-IFV-ALRI in children under five years (1.9 [95%CI 0.5-6.6]) vs 3.4 [95%CI 1.6-7.3], Supplementary table 15-16). Thus the risk of dying from IFV compared with non-IFV-ALRI was 0.56 (1.9/3.4).

After calculating the proportion, we applied it to pneumonia deaths (U5 PNE) in 2015 per country to estimate the country-specific IFV-ALRI overall deaths (Supplementary table 16). Based on pneumonia deaths under five years for the *i*th month (MonPNE<sub>*i*</sub>), IFV positivity for the *i*th month (PropIFV<sub>*i*</sub>, %), and the relative hCFR (0.56), country-specific IFV-ALRI overall deaths were estimated as:

$$U5\ PNE * \left( \sum_1^k \left( \frac{PropIFV_i * 0.56}{(PropIFV_i * 0.56 + (1 - PropIFV_i) * 1.00)} * MonPNE_i \right) / \sum_1^k MonPNE_i \right)$$

In Approach 3, the bias mainly came from the ratio of CFR of IFV-ALRI deaths over that for non-IFV-ALRI deaths, which was estimated based on eight hospital-based studies from RSV GEN from low- and middle-income countries. We were unable to find an alternative estimate in other studies. However, the 2015 CFR estimate of all-cause overall severe pneumonia (4.2%) and our CFR estimate of hospitalised IFV-ALRI (1.9%) suggested a lower CFR ratio (0.45) which would be reflected in a lower inflation factor, and a lower mortality estimate.<sup>5</sup>



**Supplementary table 16: Approach 3 - Inflation factor for IFV-ALRI mortality in developing countries, and overall IFV-ALRI mortality among children younger than five years \***

| Year            | Country         | IFV-PNE death at the site (a) | PNE death at the site (b) | Proportion of IFV-PNE deaths (c=a/b, %) | 2015 U5 PNE deaths (d) <sup>4</sup> | Overall IFV-ALRI deaths (e = d*c) | IFV-ALRI in-hospital deaths (f) | Inflation factor (h = e/f) | Average inflation factor | Global overall IFV-ALRI mortality <sup>†</sup> |
|-----------------|-----------------|-------------------------------|---------------------------|-----------------------------------------|-------------------------------------|-----------------------------------|---------------------------------|----------------------------|--------------------------|------------------------------------------------|
| 2010-2012       | Bangladesh      | 8.6                           | 208                       | 4.1                                     | 17408                               | 720                               | 361                             | 2.0                        |                          |                                                |
| 2010-2015       | South Africa    | 5.4                           | 125                       | 4.3                                     | 7105                                | 307                               | 98                              | 3.1                        |                          |                                                |
| 2012-2016       | Mozambique      | 5.9                           | 151                       | 3.9                                     | 11769                               | 460                               | 104                             | 4.4                        | 3.4                      | 51100 (UR 19500-140400)                        |
| 2008; 2010-2015 | Kenya (Nairobi) | 14.6                          | 244                       | 6.0                                     | 10584                               | 633                               | 142                             | 4.5                        |                          |                                                |
| 2010-2016       | Kenya (Siaya)   | 69.8                          | 1261                      | 5.5                                     | 10584                               | 586                               | 142                             | 4.1                        |                          |                                                |

\* PNE: pneumonia. IFV: influenza virus. U5: in children under five years.

<sup>†</sup> Estimated by summing up overall mortality in developing (inflation factor = 3.4) and industrialised countries (inflation factor = 1.6)

**Supplementary table 17: Information of tested/untested hospitalised ALRI cases/deaths in eight studies in low- and middle-income countries with available data\*.**

| Location (Study period)    | Age     | IFV-ALRI deaths | IFV-ALRI cases | ALRI deaths tested negative for IFV | ALRI cases tested negative for IFV | Untested ALRI deaths | Untested ALRI cases | Non-IFV-ALRI deaths | Non-IFV-ALRI cases |
|----------------------------|---------|-----------------|----------------|-------------------------------------|------------------------------------|----------------------|---------------------|---------------------|--------------------|
| Gambia; 2011-2013          | 0-5 m   | 0               | 17             | 5                                   | 239                                | 0                    | 3                   | 5                   | 242                |
| Morocco; 2010-2011         | 0-5 m   | 0               | 3              | 14                                  | 125                                | 0                    | 0                   | 14                  | 125                |
| Mozambique; 2011-2014      | 0-5 m   | 0               | 5              | 5                                   | 108                                | 0                    | 1                   | 5                   | 109                |
| South Africa; 1998 to 2005 | 0-5 m   | 1               | 28             | 92                                  | 934                                | 17                   | 42                  | 109                 | 976                |
| South Africa; 2011-2013    | 0-5 m   | 0               | 18             | 17                                  | 437                                | 0                    | 3                   | 17                  | 440                |
| Thailand; 2005-2011        | 0-5 m   | 0               | 34             | 5                                   | 669                                | 26                   | 1961                | 31                  | 2630               |
| Togo; 2011-2013; 2014-2015 | 0-5 m   | 0               | 1              | 2                                   | 33                                 | 1                    | 5                   | 3                   | 38                 |
| Zambia; 2011-2013          | 0-5 m   | 3               | 11             | 58                                  | 310                                | 4                    | 6                   | 62                  | 316                |
| Gambia; 2011-2013          | 6-11 m  | 0               | 4              | 5                                   | 135                                | 2                    | 5                   | 7                   | 140                |
| Morocco; 2010-2011         | 6-11 m  | 0               | 9              | 8                                   | 126                                | 0                    | 0                   | 8                   | 126                |
| Mozambique; 2011-2014      | 6-11 m  | 1               | 7              | 2                                   | 90                                 | 0                    | 4                   | 2                   | 94                 |
| South Africa; 1998 to 2005 | 6-11 m  | 2               | 20             | 24                                  | 585                                | 5                    | 21                  | 29                  | 606                |
| South Africa; 2011-2013    | 6-11 m  | 1               | 15             | 13                                  | 211                                | 0                    | 0                   | 13                  | 211                |
| Thailand; 2005-2011        | 6-11 m  | 0               | 110            | 3                                   | 1437                               | 22                   | 3846                | 25                  | 5283               |
| Togo; 2011-2013; 2014-2015 | 6-11 m  | 0               | 5              | 0                                   | 18                                 | 0                    | 2                   | 0                   | 20                 |
| Zambia; 2011-2013          | 6-11 m  | 1               | 7              | 28                                  | 139                                | 3                    | 3                   | 31                  | 142                |
| Gambia; 2011-2013          | 12-59 m | 0               | 12             | 7                                   | 219                                | 3                    | 4                   | 10                  | 223                |
| Morocco; 2010-2011         | 12-59 m | 1               | 16             | 7                                   | 510                                | 0                    | 0                   | 7                   | 510                |
| Mozambique; 2011-2014      | 12-59 m | 0               | 11             | 3                                   | 190                                | 2                    | 6                   | 5                   | 196                |
| South Africa; 1998 to 2005 | 12-59 m | 1               | 50             | 18                                  | 985                                | 10                   | 56                  | 28                  | 1041               |
| South Africa; 2011-2013    | 12-59 m | 1               | 21             | 5                                   | 239                                | 0                    | 0                   | 5                   | 239                |
| Thailand; 2005-2011        | 12-59 m | 1               | 559            | 7                                   | 5086                               | 30                   | 15811               | 37                  | 20897              |
| Togo; 2011-2013; 2014-2015 | 12-59 m | 0               | 14             | 0                                   | 84                                 | 1                    | 3                   | 1                   | 87                 |
| Zambia; 2011-2013          | 12-59 m | 2               | 13             | 21                                  | 144                                | 2                    | 5                   | 23                  | 149                |

\* Only including studies testing  $\geq 90\%$  of ALRI cases.

**Supplementary table 18: hCFR meta-estimates in ALRI cases those were positive for IFV, negative for IFV, and in those untested ALRI cases. \***

|         | <b>hCFR in IFV cases (%)</b> | <b>hCFR in IFV negative cases (%)</b> | <b>hCFR in non-test cases (%)</b> | <b>hCFR in all non-IFV cases (%)</b> | <b>hCFR in tested cases (IFV positive and negative) (%)</b> |
|---------|------------------------------|---------------------------------------|-----------------------------------|--------------------------------------|-------------------------------------------------------------|
| 0-5 m   | 1.1 (0.1-19.4)               | 5.0 (2.5-10.0)                        | 10.4 (1.9-41.1)                   | 5.5 (2.8-10.5)                       | 4.9 (2.3-9.8)                                               |
| 6-11 m  | 3.1 (0.8-11.0)               | 3.1 (1.2-8.1)                         | 11.1 (0.9-62.9)                   | 3.7 (1.6-8.5)                        | 3.2 (1.2-8.1)                                               |
| 12-59 m | 1.4 (0.4-5.6)                | 1.4 (0.5-3.9)                         | 16.4 (2.5-59.9)                   | 2.0 (0.8-4.8)                        | 1.5 (0.5-3.9)                                               |
| 0-59 m  | 1.9 (0.5-6.6)                | 2.8 (1.2-6.5)                         | 13.5 (3.1-43.7)                   | 3.4 (1.6-7.3)                        | 2.8 (1.1-6.5)                                               |

\* Meta-estimates were based on the data in eight studies in low- and middle-income countries providing relevant data by three age bands and testing  $\geq 90\%$  of eligible ALRI cases.

## Details of denominator scaling

Before meta-analyses, we extracted the number of cases and for each study, and scaled the population denominator by applying the original denominator to the proportion of eligible cases who were tested. In published studies to avoid underestimating rates, the number of cases are usually scaled (the observed case number divided by the proportion of eligible cases who are tested). The rates would be the same when we scaled the case number (Formula 1) and scaled the denominator (Formula 2). However, we considered the scaled denominator could better reflect the true size of each study, and the weight of each study in meta-analyses than the original denominator.

Formula 1 - scaling the case number:

$$\text{Rate} = (\text{No. of observed cases} / \text{Proportion of test}) / \text{Original denominator}$$

Formula 2 - scaling the denominator:

$$\text{Rate} = \text{No. of observed cases} / (\text{Proportion of test} * \text{Original denominator})$$

Rates are same in Formula 1 and 2. The difference lies in that the original denominator would be used in meta-analyses in Formula 1; while in Formula 2, the scaled denominator (Proportion of test \* Original denominator) would be used as input data in meta-analyses.

As in Supplementary table 2, all studies were categorised into five groups based on the sampling strategy. For example, of the 59 studies in the main analyses for IFV-ALRI hospitalisation rates, 49% (29/59) of studies sampled and tested at least 90% of eligible cases, 17% (10/59) sampled and tested cases systematically, 14% (8/59) sampled and tested <90% of eligible cases mainly because of refusal (10%), and without reporting any reasons (3%). Additionally, in 20% (12/59) of studies, the proportions of test in eligible cases are not reported. We did not scale denominators in the studies without the information of proportions of test.

## Data imputation

For the community setting, data on incidence rates were insufficient for analysis by narrow age groups. So in this setting we analysed data for the overall age band (0-59 months). Not all studies reported data for 0-59 months; other age groups commonly reported were 0-11 months, 0-23 months. Thus, we decided to impute rates for missing 0-59 months. Our primary focus was to impute incidence rates; hospitalisation rates for missing 0-59 months were also imputed. The imputed hospitalisation rates were only analysed in sensitivity analysis; we reported the hospitalisations from age-stratified analysis as the main analysis which did not require imputed data. The imputation was done as follows. First, we estimated denominators according to WHO life tables by World Bank income level. Based on the  ${}_nq_x$  (the probability of dying between age  $n$  and  $x+n$ ) for both sexes in 2013, we computed the ratios between population estimates in age groups (0-11 m, 0-23 m, 0-59 m).<sup>6</sup> Because the information is only available for 0-11 months and 12-59 months, we assumed that the probability of dying within 12-59 months was same. By multiplying the specific ratios by the base denominator, we estimated the denominator for 0-59 months.

After denominator estimation, for studies missing case numbers, we imputed case numbers using a multiple imputation approach assuming the rates for 0-59 m were missing at random (Supplementary figure 2).<sup>7</sup> Briefly, we firstly did meta-analyses to estimate the rate ratios between 0-59 m and one of other age groups (i.e., 0-11 m, 0-23 m, 0-35 m). Here, 0-59 m and any one of other age groups made one comparison (e.g., 0-59 m vs 0-11 m). For each comparison we only performed meta-analysis when there were three or more studies. We assumed the pooled rate ratio followed a log-normal distribution, and simulated 100 samples using the pooled rate ratio and standard error for each comparison. Then based on the samples of rate ratios, we imputed rates for 0-59 months based on the rates in the reference group and the corresponding rate ratios; using the denominator and imputed rate we calculated the case number. This gave us 100 datasets of imputed case number. We did meta-analysis for each dataset, and combined the meta-estimates together using the Rubin's rules.<sup>8,9</sup>

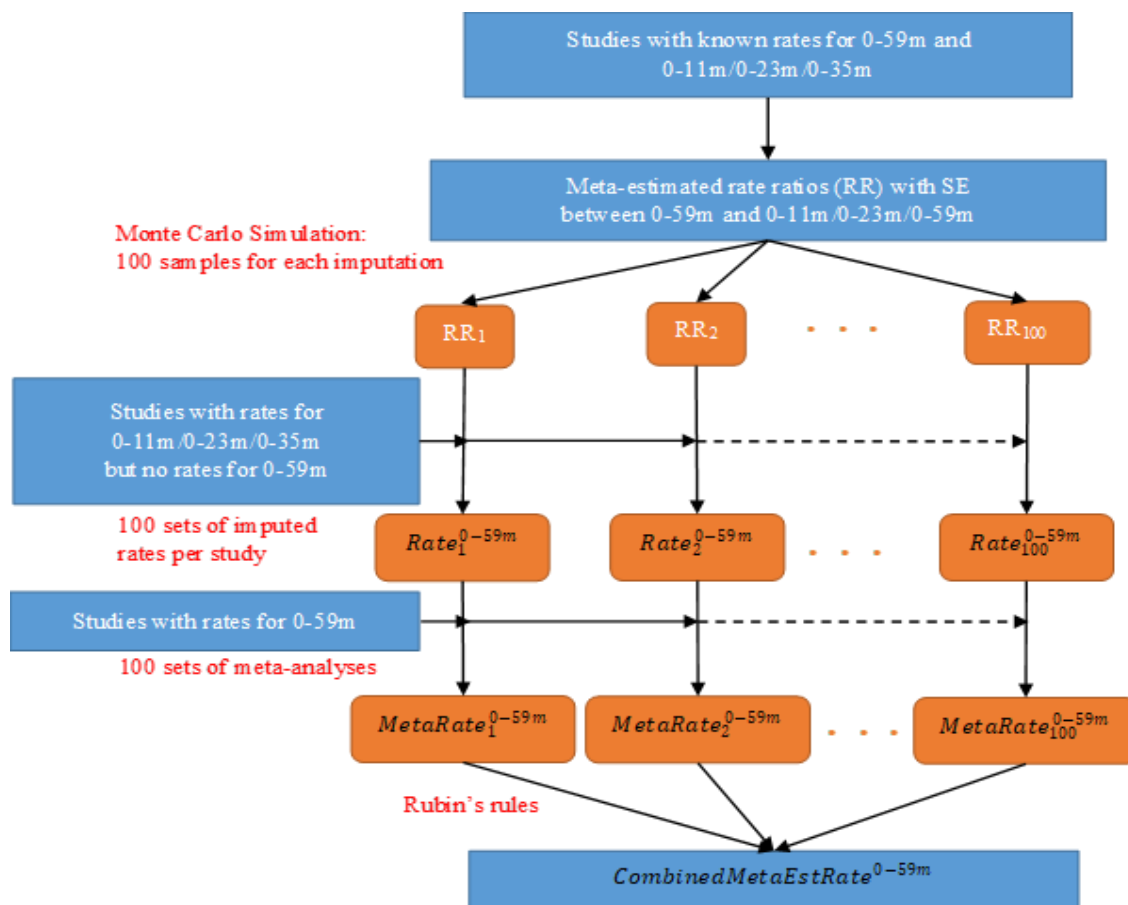

Supplementary figure 2. Imputing rates for 0-59 months using a multiple imputation approach.

In our previous analysis, we imputed rates for 0-59 months using median rate ratios.<sup>10</sup> Briefly, we imputed rates based on median rate ratios and the data in the reference age group. Unlike the multiple imputation approach,

there was one imputed number for one study. The results from the median rate ratio approach and the multiple imputation approach are in Supplementary table 19.

**Supplementary table 19: Incidence/hospitalisation rate meta-estimates for 0-59 months when excluding and including imputed data using the median rate ratio approach and the multiple imputation approach.**

|                                          | Excluding imputed data |                    | Including imputed data (median rate ratio approach) |                  | Including imputed data (multiple imputation approach) |
|------------------------------------------|------------------------|--------------------|-----------------------------------------------------|------------------|-------------------------------------------------------|
|                                          | No*                    | Rate†              | No                                                  | Rate             | Rate                                                  |
| <b>In the community setting‡</b>         |                        |                    |                                                     |                  |                                                       |
| IFV-episodes                             | 5                      | 142.9 (69.2-271.9) | 8 (3)                                               | 135.5 (84-211.3) | 175.2 (101.5-302.3)§                                  |
| IFV-ALRI                                 | 5                      | 15.4 (10-23.6)     | 8 (3)                                               | 15.8 (10.5-23.9) | 15.6 (10.3-22.6)                                      |
| IFV-severe ALRI                          | 4                      | 2.4 (0.6-9.6)      | 7 (3)                                               | 2.3 (1-5.2)      | 2.4 (1.0-5.6)                                         |
| IFV-very severe ALRI                     | 3                      | 0.7 (0.1-3.9)      | 4 (1)                                               | 0.7 (0.2-2.9)    | 0.7 (0.2-2.7)                                         |
| <b>Hospital-based studies (IFV-ALRI)</b> |                        |                    |                                                     |                  |                                                       |
| Developing                               | 59                     | 1.3 (1.0-1.8)      | 62 (3)                                              | 1.3 (0.9-1.7)    | 1.3 (0.9-1.7)                                         |
| Industrialised                           | 25                     | 0.9 (0.7-1.2)      | 29 (4)                                              | 0.8 (0.6-1.1)    | 0.8 (0.6-1.1)                                         |

\* No: number of studies. Data in parentheses was the number of imputed studies.

† Rate: per 1,000 children per year. Incidence rate for community-based studies; hospitalisation rate for hospital-based studies.

‡ Rates in developing countries.

§ We estimated a higher rate ratio between 0-59 m and 0-11 m (or 0-23 m) using the multiple imputation approach compared with the median rate ratio approach. This was mainly driven by one large study in Bangladesh in which the incidence rates of IFV-episodes increased with age. Unlike the median rate ratio, the rate ratio from a meta-analysis was influenced by study sizes. Thus, the higher rate ratio translated to the higher incidence rates after imputation.

## Tables for description of included studies and quality of included studies

**Supplementary table 20: Description of studies reporting IFV-episodes incidence rates in children under five years (per 1,000 children per year)\*†.**

| ID     | Location (reference)                                                         | Case Definition      | Denominator source      | Specimen and diagnostic test                                                                   | 0-27 d | 1-2 m | 3-5 m | 6-11 m | 12-23 m | 24-59 m | 0-5 m | 0-59 m |
|--------|------------------------------------------------------------------------------|----------------------|-------------------------|------------------------------------------------------------------------------------------------|--------|-------|-------|--------|---------|---------|-------|--------|
| 700    | Bamako, Mali (Sep 2011-Jan 2014) (Tapia et al, 2016) <sup>11</sup>           | Fever; ARI AND Fever | Defined population base | NPS and OPS; PCR                                                                               | 36.1   | 40.1  | 133.0 | ..     | ..      | ..      | 83.1  | ..     |
| 701    | IISP sites, USA (Oct 2009-Jul 2013) (Fowlkes et al, 2015) <sup>12</sup>      | ILI; ARI AND Fever   | Census-derived estimate | Nasal swabs, nasal aspirates, NPS, or OPS; PCR                                                 | ..     | ..    | ..    | ..     | ..      | 13.2    | ..    | 9.7    |
| 703    | Turku, Finland (Oct 2000-May 2002) (Heikkinen et al, 2004) <sup>13</sup>     | ARI AND Fever        | Defined population base | Nasal swabs; Viral culture and subsequent immunoperoxidase staining with monoclonal antibodies | ..     | ..    | ..    | ..     | 185.3   | 110.6   | ..    | 132.3  |
| 801    | Senegal (Jan 2012-Dec 2013) (Diene-Sarr et al, 2015) <sup>14</sup>           | Fever                | Defined population base | NP and oral specimens; PCR                                                                     | ..     | ..    | ..    | ..     | ..      | 259.7   | 45.5  | 300.0  |
| 802    | Senegal (Jan 2012-Dec 2013) (Diene-Sarr et al, 2015) <sup>14</sup>           | Fever                | Defined population base | NP and oral specimens; PCR                                                                     | ..     | ..    | ..    | ..     | ..      | 282.1   | 280   | 317.2  |
| b_40   | Nashville, TN, USA (Aug 1974-Jul 1999) (Neuzil et al, 2002) <sup>15</sup>    | ARI; Fever           | Defined population base | Nasal wash; Culture and HI or DFA                                                              | ..     | ..    | ..    | ..     | 114     | 81.7    | ..    | 95.0   |
| ba_3   | Ballabgarh, India (2001-2005) (Broor et al, 2007) <sup>16</sup>              | ARI                  | Defined population base | NPW; DFA                                                                                       | ..     | ..    | ..    | ..     | 174.2   | ..      | ..    | ..     |
| ba_4   | Kamalapur, Bangladesh (Apr 2004-Dec 2007) (Brooks et al, 2010) <sup>17</sup> | ARI AND Fever        | Defined population base | NPW; Viral culture and HI                                                                      | ..     | ..    | ..    | ..     | 78.7    | 71.5    | ..    | 92.7   |
| up_2   | Managua, Nicaragua (Sep 2012-Sep 2015) (Gordon and colleagues)               | ARI; Fever           | Defined population base | Nasal and throat swabs; PCR                                                                    | 41.7   | 56.5  | 140.6 | 244.0  | 263     | ..      | 102.9 | ..     |
| up_25  | Kamalapur, Bangladesh (2008-2015) (Brooks and colleagues)                    | ARI AND Fever        | Defined population base | NPW; PCR and tissue culture                                                                    | 0.4    | 4.5   | 23.1  | 110.6  | 199.5   | 274.4   | 9.3   | 126.7  |
| up_600 | Nepal (April 2011-May 2014) (Omer and colleagues)                            | ARI AND Fever        | Defined population base | NPS; PCR                                                                                       | 66.7   | 105.6 | ..    | ..     | ..      | ..      | 94.1  | ..     |

\* NPA: nasopharyngeal aspirate. NPS: nasopharyngeal swab. NPW: nasopharyngeal wash. OPS: oropharyngeal swab. PCR: polymerase chain reaction. IFA: indirect immunofluorescence assay. DFA: direct immunofluorescence. ELISA: enzyme-linked immunosorbent assay. HI: hemagglutination-inhibition assay. RIDT: rapid influenza diagnostic test. SPIA: solid-phase immunoassay. MN: micro-neutralization assay. TRFIA: time-resolved fluoroimmunoassay. ILI: influenza like illness (fever and either cough or sour throat). ARI: any of respiratory symptoms, including cough, sour throat, rhinitis, pharyngitis, and others.

† Incidence rates were adjusted for the proportion of testing in eligible patients where available.

| ID     | Location (reference)                                                             | Case Definition      | Denominator source       | Specimen and diagnostic test       | 0-27 d | 1-2 m | 3-5 m | 6-11 m | 12-23 m | 24-59 m | 0-5 m | 0-59 m |
|--------|----------------------------------------------------------------------------------|----------------------|--------------------------|------------------------------------|--------|-------|-------|--------|---------|---------|-------|--------|
| up_601 | Mali (Sep 2011-Jan 2014) (Omer and colleagues)                                   | ARI AND Fever; Fever | Defined population base  | NPS; PCR                           | 40     | 33.6  | ..    | ..     | ..      | ..      | 35.5  | ..     |
| up_602 | South Africa (Mar 2011-May 2013) (Omer and colleagues)                           | ARI; Fever           | Defined population base  | NPS; PCR                           | 26.7   | 111.7 | ..    | ..     | ..      | ..      | 86.6  | ..     |
| 229    | Nam, Vietnam (2007-2010) (Horby et al, 2012) <sup>18</sup>                       | ILI                  | Defined population base  | Nasal and Throat swabs; PCR        | ..     | ..    | ..    | ..     | ..      | ..      | ..    | 27.8   |
| 702    | Izu-Oshima Island, Japan (Jan 2009-Mar 2011) (Inamasu et al, 2012) <sup>19</sup> | ILI                  | Census-derived estimate  | NPS; RIDT and PCR                  | ..     | ..    | ..    | ..     | ..      | ..      | ..    | 180.4  |
| s40_8  | Japan (Dec-Jun, 2004-2008) (Kimura et al, 2011) <sup>20</sup>                    | ILI                  | Census-based estimate    | NPS or NPA; Rapid antigen test kit | ..     | ..    | ..    | ..     | ..      | ..      | ..    | 124.1  |
| ba_1   | Berne, Switzerland (Apr 1999-Dec 2004) (Regamey et al, 2008) <sup>21</sup>       | ARI                  | Defined population base  | Nasal swabs; PCR                   | ..     | ..    | ..    | ..     | ..      | ..      | ..    | ..     |
| e19    | India (Aug 2012-Dec 2014) (Kumar et al, 2017) <sup>22</sup>                      | ARI; Fever           | Defined population base  | NPA; PCR                           | ..     | ..    | ..    | ..     | ..      | ..      | ..    | ..     |
| e24    | Southwest Finland (Jan 2010-Apr 2012) (Teros-Jaakkola et al, 2017) <sup>23</sup> | ARI; Fever           | Defined population base  | Nasal swabs; PCR                   | ..     | ..    | ..    | ..     | ..      | ..      | ..    | ..     |
| e17    | USA (Jul 2010-Jun 2014) (Buck et al, 2017) <sup>24</sup>                         | ARI                  | Defined population base  | NA; NA                             | ..     | ..    | ..    | ..     | ..      | ..      | ..    | ..     |
| e21    | Sydney, Australia (May-Nov 2011) (Li-Kim-Moy et al, 2017) <sup>25</sup>          | ARI AND Fever        | Defined population base  | Nasal and throat swabs; PCR        | ..     | ..    | ..    | ..     | ..      | ..      | ..    | ..     |
| e23    | Nepal (Apr 2011-Apr 2013) (Steinhoff et al, 2017) <sup>26</sup>                  | ARI; Fever           | Defined population base  | Nasal swabs; PCR                   | ..     | ..    | ..    | ..     | ..      | ..      | 181.3 | ..     |
| 180_7  | Australia (2010-2014) (Sarna et al, 2017) <sup>27</sup>                          | ARI                  | Defined population base  | Nose swab; PCR                     | ..     | ..    | ..    | ..     | ..      | ..      | ..    | ..     |
| f03_7  | Romania (2011-2016) (Gefenaite et al, 2018) <sup>28</sup>                        | ILI                  | Census-derived estimate  | NPS; PCR                           | ..     | ..    | ..    | ..     | ..      | ..      | ..    | 1.4    |
| f05_2  | Nepal (2011-2013) (Katz et al, 2018) <sup>29</sup>                               | ARI/Fever            | Defined population base  | Nasal swab; PCR                    | ..     | ..    | ..    | ..     | ..      | ..      | 190.5 | ..     |
| f07_1  | Spain (2010-2016) (Oliva et al, 2018) <sup>30</sup>                              | ILI                  | Census derived estimates | Respiratory swab; NA               | ..     | ..    | ..    | ..     | ..      | ..      | ..    | 24.4   |
| s40_8  | Japan (2004-2008) (Kimura et al et al, 2011) <sup>20</sup>                       | ILI                  | Census derived estimates | NPS or NPA; Rapid antigen test     | ..     | ..    | ..    | ..     | ..      | ..      | ..    | 124.1  |



**Supplementary table 21: Description of studies reporting IFV-associated ALRI incidence rates in children under 5 years (per 1,000 children per year) \*†**

| ID    | Location (reference)                                                                  | Case Definition    | Denominator source      | Specimen and diagnostic test                                                             | 0-27 d | 1-2 m | 3-5 m | 6-11 m | 12-23 m | 24-59 m | 0-5 m | 0-59 m |
|-------|---------------------------------------------------------------------------------------|--------------------|-------------------------|------------------------------------------------------------------------------------------|--------|-------|-------|--------|---------|---------|-------|--------|
| b_11  | Multicentre, Germany (Nov 1999- Oct 2001) (Forster et al, 2004) <sup>31</sup>         | ALRI; Croup        | Census-derived estimate | NPA; PCR                                                                                 | ..     | ..    | ..    | ..     | 12.4    | ..      | ..    | ..     |
| b_40  | Nashville, TN, USA (Aug 1974-Jul 1999) (Neuzil et al, 2002) <sup>15</sup>             | ALRI               | Defined population base | Nasal wash; Culture and HI or DFA                                                        | ..     | ..    | ..    | ..     | 10.5    | 3.9     | ..    | 8.5    |
| ba_3  | Ballabgarh, India; rural (2001-2005) (Broor et al, 2007) <sup>16</sup>                | ALRI               | Defined population base | NPW; DFA                                                                                 | ..     | ..    | ..    | ..     | 58.1    | ..      | ..    | ..     |
| ba_4  | Kamalapur, Bangladesh; urban (Apr 2004 - Dec 2007) (Brooks et al, 2010) <sup>17</sup> | ALRI               | Defined population base | NPW; Culture and HI                                                                      | ..     | ..    | ..    | ..     | 70.6    | 20.3    | ..    | 25.4   |
| up_1  | Faridabad, Haryana, India; rural (Aug 2012-Aug 2014) (Krishnan and colleagues)        | ALRI               | Census-derived estimate | OP or nasal specimens; PCR                                                               | 0      | 27.8  | 14.6  | 19.0   | 21.7    | 5.4     | 18.0  | 10.9   |
| up_2  | Managua, Nicaragua (Sep 2012-Sep 2015) (Gordon and colleagues)                        | ALRI               | Defined population base | Nasal and throat swabs; PCR                                                              | 0      | 0     | 10.4  | 32.2   | 17.3    | ..      | 5.9   | ..     |
| up_25 | Kamalapur, Bangladesh; urban (2008-2014) (Brooks and colleagues)                      | ALRI AND No wheeze | Defined population base | NPW; PCR and tissue culture                                                              | 0      | 2.3   | 7.8   | 29.4   | 40.0    | 20.2    | 3.4   | 17.9   |
| up_26 | Oshikhandass, Pakistan; rural (Apr 2012-Mar 2014) (Rasmussen and colleagues)          | ALRI               | Defined population base | NPS; PCR                                                                                 | 0      | 0     | 0     | 0      | 17.4    | 3.8     | 0     | 5.8    |
| up_3  | Western Province, South Africa (Mar 2012-Dec 2016) (Zar and colleagues)               | ALRI               | Census-derived estimate | NPS; PCR                                                                                 | 21.5   | 71.4  | 44.1  | 24.1   | 21.3    | 1.2     | 50.4  | 22.8   |
| 703   | Turku, Finland (Oct 2000-May 2002) (Heikkinen et al, 2004) <sup>13</sup>              | ALRI               | Defined population base | Nasal swabs; Culture and subsequent immunoperoxidase staining with monoclonal antibodies | ..     | ..    | ..    | ..     | ..      | ..      | ..    | ..     |
| e19   | India (Aug 2012-Dec 2014) (Kumar et al, 2017) <sup>22</sup>                           | ALRI               | Defined population base | NPA; PCR                                                                                 | ..     | ..    | ..    | ..     | ..      | ..      | ..    | ..     |
| 1807  | Brisbane, Australia (2010-2014) (Sarna et al et al, 2017) <sup>27</sup>               | ALRI; wheeze       | Defined population base | Nose swab; PCR                                                                           | ..     | ..    | ..    | ..     | ..      | ..      | ..    | ..     |

\* NPA: nasopharyngeal aspirate. NPS: nasopharyngeal swab. NPW: nasopharyngeal wash. OPS: oropharyngeal swab. PCR: polymerase chain reaction. IFA: indirect immunofluorescence assay. DFA: direct fluorescent antibody. ELISA: enzyme-linked immunosorbent assay. HI: hemagglutination-inhibition assay. RIDT: rapid antigen detection test. SPIA: solid-phase immunoassay. MN: micro-neutralization assay. TRFIA: time-resolved fluoroimmunoassay. ARI: any of respiratory symptoms, including cough, sour throat, rhinitis, pharyngitis, and others. ALRI, sALRI, and vsALRI: WHO definition for ALRI, chest wall indrawing ALRI, and very severe ALRI.

† Incidence rates were adjusted for the proportion of testing in eligible patients where available.

**Supplementary table 22: Description of studies reporting incidence rates of IFV-associated severe ALRI in children under 5 years (per 1,000 children pr year)\*†**

| ID      | Location (reference)                                                         | Case Definition | Denominator source          | Specimen and diagnostic test | 0-27 d | 1-2 m | 3-5 m | 6-11 m | 12-23 m | 24-59 m | 0-5 m | 0-59 m |
|---------|------------------------------------------------------------------------------|-----------------|-----------------------------|------------------------------|--------|-------|-------|--------|---------|---------|-------|--------|
| ba_4    | Kamalapur, Bangladesh (Apr 2004-Dec 2007) (Brooks et al, 2010) <sup>17</sup> | sALRI           | Defined population base     | NPW; Viral culture and HI    | ..     | ..    | ..    | ..     | 1.7     | 0       | ..    | 0.6    |
| up_1    | Haryana, India (Aug 2012-Aug 2014) (Krishnan and colleagues)                 | sALRI           | Census-derived estimate     | OP or nasal specimens; PCR   | 0      | 13.9  | 14.6  | 6.3    | 6.2     | 1.6     | 13.5  | 4.0    |
| up_2    | Managua, Nicaragua (Sep 2012-Sep 2015) (Gordon and colleagues)               | sALRI           | Defined population base     | Nasal and throat swabs; PCR  | 0      | 0     | 0     | 10.7   | 4.7     | ..      | 0     | ..     |
| up_25   | Kamalapur, Bangladesh (2008-2014) (Brooks and colleagues)                    | sALRI           | Defined population base     | NPW; PCR and tissue culture  | 0      | 0.4   | 0.3   | 1.7    | 1.4     | 0.6     | 0.3   | 0.7    |
| up_27_1 | Sindh, Pakistan (Oct 2011-June 2014) (Asad and colleagues)                   | sALRI           | Defined population base     | NPS; PCR                     | ..     | ..    | ..    | ..     | ..      | ..      | 7.8   | ..     |
| up_3    | Western Province, South Africa (March 2012-Dec 2016) (Zar and colleagues)    | sALRI           | Census-derived estimate     | NPS; PCR                     | 21.5   | 66.7  | 33.1  | 18.1   | 14.6    | 0       | 43.5  | 17.6   |
| ba_2    | Mirzapur, Bangladesh (Oct 1993-Aug 1996) (Hasan et al, 2006) <sup>32</sup>   | sALRI           | Defined population base     | NPA; ELISA                   | ..     | ..    | ..    | ..     | ..      | ..      | ..    | ..     |
| up_52_1 | Sylhet, Bangladesh (2011-2013) (Saha and colleagues)                         | pSBI            | Defined population estimate | NPS or OPS; PCR              | 16.4   | ..    | ..    | ..     | ..      | ..      | ..    | ..     |
| up_52_2 | Karachi, Pakistan (2012-2013) (Saha and colleagues)                          | pSBI            | Defined population estimate | NPS or OPS; PCR              | 12.2   | ..    | ..    | ..     | ..      | ..      | ..    | ..     |
| up_52_3 | Matuari, Pakistan (2012-2013) (Saha and colleagues)                          | pSBI            | Defined population estimate | NPS or OPS; PCR              | 5.3    | ..    | ..    | ..     | ..      | ..      | ..    | ..     |
| up_52_4 | Vellore, India (2013-2014) (Saha and colleagues)                             | pSBI            | Defined population estimate | NPS or OPS; PCR              | 7.4    | ..    | ..    | ..     | ..      | ..      | ..    | ..     |
| up_52_5 | Odisha, India (2013-2014) (Saha and colleagues)                              | pSBI            | Defined population estimate | NPS or OPS; PCR              | 7.6    | ..    | ..    | ..     | ..      | ..      | ..    | ..     |
| up_60_0 | Nepal (Apr 2011-May 2014) (Omer and colleagues)                              | sALRI           | Defined population base     | NPS; PCR                     | 7.4    | 6.2   | ..    | ..     | ..      | ..      | 6.6   | ..     |
| up_60_1 | Mali (Sep 2011-Jan 2014) (Omer and colleagues)                               | sALRI           | Defined population base     | NPS; PCR                     | 0      | 0     | ..    | ..     | ..      | ..      | 0     | ..     |

\* NPA: nasopharyngeal aspirate. NPS: nasopharyngeal swab. NPW: nasopharyngeal wash. OPS: oropharyngeal swab. PCR: polymerase chain reaction. IFA: indirect immunofluorescence assay. DFA: direct fluorescent antibody. ELISA: enzyme-linked immunosorbent assay. HI: hemagglutination-inhibition assay. RIDT: rapid influenza diagnostic test. SPIA: solid-phase immunoassay. MN: micro-neutralization assay. TRFIA: time-resolved fluoroimmunoassay. ALRI, sALRI, and vsALRI: WHO definition for ALRI, chest wall indrawing ALRI, and very severe ALRI applied by a health worker. pSBI: WHO possible severe bacterial infections.

† Incidence rates were adjusted for the proportion of testing in eligible patients where available.

**Supplementary table 23: Description of studies reporting incidence rates of IFV-associated very severe ALRI in children under 5 years (per 1,000 children per year) <sup>\*†</sup>**

| ID    | Location (reference)                                                    | Case Definition | Denominator source      | Specimen and diagnostic test | 0-27 d | 1-2 m | 3-5 m | 6-11 m | 12-23 m | 24-59 m | 0-5 m | 0-59 m |
|-------|-------------------------------------------------------------------------|-----------------|-------------------------|------------------------------|--------|-------|-------|--------|---------|---------|-------|--------|
| up_1  | Haryana, India (Aug 2012-Aug 2014) (Krishnan and colleagues)            | vsALRI          | Census-derived estimate | OP and nasal specimens; PCR  | 0      | 13.9  | 14.6  | 3.2    | 3.1     | 0.5     | 13.5  | 2.3    |
| up_2  | Managua, Nicaragua (Sep 2012-Sep 2015) (Gordon and colleagues)          | vsALRI          | Defined population base | Nasal and throat swabs; PCR  | 0      | 0     | 0     | 2.7    | 1.6     | ..      | 0     | ..     |
| up_25 | Kamalapur, Bangladesh (2007-2014) (Brooks and colleagues)               | vsALRI          | Defined population base | NPW; PCR and tissue culture  | 0      | 0     | 0     | 0.2    | 0.2     | 0       | 0     | 0.1    |
| up_3  | Western Province, South Africa (Mar 2012-Dec 2016) (Zar and colleagues) | vsALRI          | Census-derived estimate | NPS; PCR                     | 10.8   | 0     | 0     | 2.0    | 3.4     | 0       | 1.7   | 1.9    |

\* NPA: nasopharyngeal aspirate. NPS: nasopharyngeal swab. NPW: nasopharyngeal wash. OPS: oropharyngeal swab. PCR: polymerase chain reaction. IFA: indirect immunofluorescence assay. DFA: direct fluorescent antibody. ELISA: enzyme-linked immunosorbent assay. HI: hemagglutination-inhibition assay. RIDT: rapid influenza diagnostic test. SPIA: Solid-phase immunoassay. MN: micro-neutralization assay. TRFIA: time-resolved fluoroimmunoassay. ALRI, sALRI, and vsALRI: WHO definition for ALRI, chest wall indrawing ALRI, and very severe ALRI applied by a health worker.

† Incidence rates were adjusted for the proportion of testing in eligible patients where available.

**Supplementary table 24: Quality studies reporting incidence rates of IFV-diseases in children under five years by severity\*†**

| Disease‡ | ID     | Location (Period of study)         | Study design | Patient group excluded | Case definition | Sampling strategy | Diagnostic test |
|----------|--------|------------------------------------|--------------|------------------------|-----------------|-------------------|-----------------|
| Episode  | 229    | Vietnam;2007-2010                  | Low          | Low                    | Low             | Low               | Low             |
| Episode  | 700    | Mali;2011-2014                     | Low          | Low                    | High            | Low               | Low             |
| Episode  | 701    | United States of America;2009-2013 | Low          | Low                    | High            | Low               | Low             |
| Episode  | 702    | Japan;2009-2011                    | High         | Low                    | High            | Low               | Low             |
| Episode  | 703    | Finland;2000-2002                  | Low          | High                   | Low             | Low               | Low             |
| Episode  | 801    | Senegal;2012-2013                  | Low          | Low                    | High            | Low               | Low             |
| Episode  | 802    | Senegal;2012-2013                  | Low          | Low                    | High            | Low               | Low             |
| Episode  | b_3    | Japan;2002-2008                    | Low          | High                   | High            | Low               | High            |
| Episode  | b_40   | United States of America;1974-1999 | Low          | Low                    | High            | Low               | Low             |
| Episode  | ba_1   | Switzerland;1999-2004              | Low          | Low                    | Low             | Low               | Low             |
| Episode  | ba_3   | India;2001-2005                    | Low          | Low                    | High            | Low               | High            |
| Episode  | ba_4   | Bangladesh;2004-2007               | Low          | Low                    | High            | Low               | Low             |
| Episode  | e17    | United States of America;2010-2014 | High         | High                   | High            | High              | High            |
| Episode  | e19    | India;2012-2014                    | Low          | High                   | High            | High              | Low             |
| Episode  | e21    | Australia;2011                     | Low          | High                   | Low             | Low               | Low             |
| Episode  | e23    | Nepal;2011-2013                    | Low          | Low                    | High            | Low               | Low             |
| Episode  | e24    | Southwest Finland;2010-2012        | Low          | Low                    | High            | Low               | Low             |
| Episode  | s408   | Japan;2004-2008                    | Low          | Low                    | Low             | High              | High            |
| Episode  | up_2   | Nicaragua;2012-2015                | Low          | Low                    | High            | Low               | Low             |
| Episode  | up_25  | Bangladesh;2007-2015               | Low          | Low                    | Low             | Low               | Low             |
| Episode  | up_600 | Nepal;2011-2014                    | Low          | Low                    | High            | Low               | Low             |
| Episode  | up_601 | Mali;2011-2014                     | Low          | Low                    | High            | Low               | Low             |
| Episode  | up_602 | South Africa;2011-2013             | Low          | Low                    | High            | Low               | Low             |
| Episode  | 1807   | Australia; 2010-2014               | Low          | High                   | High            | High              | Low             |
| Episode  | f037   | Romania; 2011-2016                 | High         | Low                    | Low             | Low               | Low             |
| Episode  | f052   | Nepal; 2011-2013                   | Low          | Low                    | High            | High              | Low             |
| Episode  | f071   | Spain; 2011-2016                   | Low          | Low                    | High            | High              | Low             |
| ALRI     | 703    | Finland;2000-2002                  | Low          | High                   | Low             | Low               | Low             |
| ALRI     | b_11   | Germany;1999-2001                  | Low          | Low                    | High            | High              | Low             |
| ALRI     | b_40   | United States of America;1974-1999 | Low          | Low                    | Low             | Low               | Low             |
| ALRI     | ba_3   | India;2001-2005                    | Low          | Low                    | Low             | Low               | High            |
| ALRI     | ba_4   | Bangladesh;2004-2007               | Low          | Low                    | Low             | Low               | Low             |
| ALRI     | e19    | India;2012-2014                    | Low          | High                   | Low             | High              | Low             |
| ALRI     | up_1   | India;2012-2014                    | Low          | Low                    | Low             | Low               | Low             |
| ALRI     | up_2   | Nicaragua;2012-2015                | Low          | Low                    | Low             | Low               | Low             |
| ALRI     | up_25  | Bangladesh;2007-2015               | Low          | Low                    | Low             | Low               | Low             |
| ALRI     | up_26  | Pakistan;2012-2014                 | Low          | Low                    | Low             | Low               | Low             |
| ALRI     | up_3   | South Africa;2012-2016             | Low          | Low                    | Low             | Low               | Low             |

\* Only in community-based studies

† Low: low risk of bias; high: high risk of bias

‡ Episode: for IFV-episode. sALRI: chest wall indrawing ALRI. vsALRI: for very severe ALRI.

| <b>Disease<sup>‡</sup></b> | <b>ID</b> | <b>Location (Period of study)</b> | <b>Study design</b> | <b>Patient group excluded</b> | <b>Case definition</b> | <b>Sampling strategy</b> | <b>Diagnostic test</b> |
|----------------------------|-----------|-----------------------------------|---------------------|-------------------------------|------------------------|--------------------------|------------------------|
| ALRI                       | 1807      | Australia; 2010-2014              | Low                 | High                          | Low                    | High                     | Low                    |
| sALRI                      | ba_2      | Bangladesh;1993-1996              | Low                 | Low                           | Low                    | Low                      | High                   |
| sALRI                      | ba_4      | Bangladesh;2004-2007              | Low                 | Low                           | Low                    | Low                      | Low                    |
| sALRI                      | up_1      | India;2012-2014                   | Low                 | Low                           | Low                    | Low                      | Low                    |
| sALRI                      | up_2      | Nicaragua;2012-2015               | Low                 | Low                           | Low                    | Low                      | Low                    |
| sALRI                      | up_25     | Bangladesh;2007-2015              | Low                 | Low                           | Low                    | Low                      | Low                    |
| sALRI                      | up_271    | Pakistan;2011-2014                | Low                 | Low                           | Low                    | Low                      | Low                    |
| sALRI                      | up_3      | South Africa;2012-2016            | Low                 | Low                           | Low                    | Low                      | Low                    |
| sALRI                      | up_521    | Bangladesh;2011-2013              | Low                 | Low                           | High                   | Low                      | Low                    |
| sALRI                      | up_522    | Pakistan;2012-2013                | Low                 | Low                           | High                   | Low                      | Low                    |
| sALRI                      | up_523    | Pakistan;2012-2013                | Low                 | Low                           | High                   | Low                      | Low                    |
| sALRI                      | up_524    | India;2013-2014                   | Low                 | Low                           | High                   | Low                      | Low                    |
| sALRI                      | up_525    | India;2013-2014                   | Low                 | Low                           | High                   | Low                      | Low                    |
| sALRI                      | up_600    | Nepal;2011-2014                   | Low                 | Low                           | Low                    | Low                      | Low                    |
| sALRI                      | up_601    | Mali;2011-2014                    | Low                 | Low                           | Low                    | Low                      | Low                    |
| vsALRI                     | up_1      | India;2012-2014                   | Low                 | Low                           | Low                    | Low                      | Low                    |
| vsALRI                     | up_2      | Nicaragua;2012-2015               | Low                 | Low                           | Low                    | Low                      | Low                    |
| vsALRI                     | up_25     | Bangladesh;2007-2015              | Low                 | Low                           | Low                    | Low                      | Low                    |
| vsALRI                     | up_3      | South Africa;2012-2016            | Low                 | Low                           | Low                    | Low                      | Low                    |

**Supplementary table 25: Description of studies reporting IFV-associated ALRI hospitalisation rates in children under 5 years (per 1,000 children per year) \*†**

| ID   | Location (reference)                                                                   | Case Definition | Denominator source      | Specimen and diagnostic test                 | 0-27 d | 1-2 m | 3-5 m | 6-11 m | 12-23 m | 24-59 m | 0-5 m | 0-59 m |
|------|----------------------------------------------------------------------------------------|-----------------|-------------------------|----------------------------------------------|--------|-------|-------|--------|---------|---------|-------|--------|
| 141  | Baguio City, Philippines; urban (2009-2011) (Tallo et al, 2014) <sup>33</sup>          | ALRI AND Fever  | Census-derived estimate | OPS or NPS; PCR                              | ..     | ..    | ..    | ..     | ..      | 2.4     | 4.4   | 3.9    |
| 156  | Jingzhou, China; urban (Apr 2010-Mar 2012) (Yu et al, 2014) <sup>34</sup>              | ARI AND Fever   | Census-derived estimate | NPS; PCR                                     | ..     | ..    | ..    | 37     | 23.6    | 21.4    | 25.1  | 21.9   |
| 32   | Multistate, USA (Oct 2003-Apr 2012) (Chaves et al, 2014) <sup>35</sup>                 | Flu             | Census-derived estimate | NPS or OPS; PCR, culture, DFA, IDFA, or RIDT | ..     | ..    | 1.0   | 0.9    | ..      | ..      | 2     | ..     |
| 34   | Hong Kong (2004-2011) (Chiu et al, 2014) <sup>36</sup>                                 | ARI AND Fever   | Census-derived estimate | NPA; DFA and viral culture, PCR              | ..     | ..    | ..    | 7.6    | 7.8     | 9.7     | 8.4   | 9.0    |
| 80   | Hong Kong (Apr 2005-Mar 2011) (Nelson et al, 2014) <sup>37</sup>                       | All             | Defined population base | NPA; Viral culture and IF                    | ..     | ..    | ..    | 13.5   | 11.8    | 9.0     | 12.8  | 10.3   |
| b_10 | Bondo district, Kenya (Jun 2007-May 2009) (from Nair et al, 2011) <sup>10</sup>        | ALRI            | Census-derived estimate | NPS or OPS; PCR                              | ..     | ..    | ..    | ..     | 1.3     | 0.3     | ..    | ..     |
| b_11 | Multicentric, Germany (Nov 1999- Oct 2001) (Forster et al, 2004) <sup>31</sup>         | ARI             | Census-derived estimate | NPA; PCR                                     | ..     | ..    | ..    | ..     | 1.4     | ..      | ..    | ..     |
| b_13 | Multistate, USA (Oct-April 2003-2008) (Dawood et al, 2010) <sup>38</sup>               | Flu             | Census-derived estimate | NPS or OPS; PCR, culture, DFA/IDFA, or RIDT  | ..     | ..    | ..    | ..     | 0.5     | 0.2     | ..    | 0.4    |
| b_14 | Kiel, Germany (Jul 1996-Jun 2000) (Wiegl et al, 2005) <sup>39</sup>                    | ARI             | Census-derived estimate | NPA; RT-PCR                                  | ..     | ..    | ..    | ..     | ..      | ..      | ..    | 1.2    |
| b_15 | Gipuzoka, Spain (Jul 2001-Jun 2004) (Montes et al, 2005) <sup>40</sup>                 | ARI             | Census-derived estimate | NPA; Viral culture and PCR                   | ..     | ..    | ..    | 0.8    | 0.7     | 0.5     | 4.1   | 0.9    |
| b_16 | East London, United Kingdom (Oct 2002- Sep 2004) (Ajayi-Obe et al, 2008) <sup>41</sup> | ARI             | Census-derived estimate | NPA; IFA and PCR                             | ..     | ..    | ..    | ..     | ..      | 0.7     | 4.3   | 1.6    |
| b_17 | Leicester, United Kingdom (Oct 2001- Jun 2002) (Nicholson et al, 2006) <sup>42</sup>   | ARI             | NHS data base           | Nasal and throat swabs; PCR                  | ..     | ..    | ..    | ..     | 2.0     | ..      | ..    | 1.6    |

\* NPA: nasopharyngeal aspirate. NPS: nasopharyngeal swab. NPW: nasopharyngeal wash. OPS: oropharyngeal swab. BAL: bronchoalveolar lavage. ETA: endotracheal aspirate. PCR: polymerase chain reaction. IFA: indirect immunofluorescence assay. DFA: direct fluorescent antibody. ELISA: enzyme-linked immunosorbent assay. IF: immunofluorescence. HI: hemagglutination-inhibition assay. RIDT: rapid influenza diagnostic test. SPIA: Solid-phase immunoassay. EIA: enzyme immunoassay. MN: micro-neutralization assay. TRFIA: time-resolved fluoroimmunoassay. ARI: any respiratory infections/symptoms (acute one of cough, sore throat, shortness of breath, coryza); ICD-codes for influenza & pneumonia (excluding non-respiratory manifestations), or acute infections (fever or <35 deg C) with any respiratory signs. ALRI: physician-diagnosed pneumonia and/or bronchiolitis, or WHO definition for ALRI requiring hospitalisation. All: all diagnosis related to influenza (including influenza & pneumonia and other non-respiratory illnesses). Flu: evidence of a positive influenza test.

† Hospitalisation rates were adjusted for the proportion of testing in hospitalised ALRI patients where available.

| ID   | Location (reference)                                                                                  | Case Definition | Denominator source      | Specimen and diagnostic test                                    | 0-27 d | 1-2 m | 3-5 m | 6-11 m | 12-23 m | 24-59 m | 0-5 m | 0-59 m |
|------|-------------------------------------------------------------------------------------------------------|-----------------|-------------------------|-----------------------------------------------------------------|--------|-------|-------|--------|---------|---------|-------|--------|
| b_19 | Nha Trang, Vietnam (Mar 2007- Feb 2008) (Yoshida et al, 2010) <sup>43</sup>                           | ARI             | Census-derived estimate | NPA; PCR                                                        | ..     | ..    | ..    | ..     | 18.4    | 4.2     | ..    | 8.7    |
| b_20 | Hong Kong (Jul 1997- Jun 1999) (Nelson et al, 2007) <sup>44</sup>                                     | ARI             | Census-derived estimate | NPA; Viral culture and serology                                 | ..     | ..    | ..    | ..     | 4.4     | 2.2     | ..    | 3      |
| b_21 | Hong Kong (Oct 2003- Sep 2006) (Chiu et al, 2009) <sup>45</sup>                                       | ARI AND Fever   | Census-derived estimate | NPA; DFA and viral culture                                      | ..     | ..    | ..    | ..     | 7.3     | 7.2     | ..    | 7.2    |
| b_22 | Suzhou, China (Jan 2007- Dec 2008) (Ji et al, 2010) <sup>46</sup>                                     | ALRI            | Census-derived estimate | NPA; DFA                                                        | ..     | ..    | ..    | ..     | 0.1     | 0.2     | ..    | 0.2    |
| b_24 | Nashville, Rochester; Cincinnati, USA (Oct 2001-Sep 2004) (Poehling et al, 2006) <sup>47</sup>        | ARI; Fever      | Census-derived estimate | Nasal and throat swabs; Viral Culture and PCR                   | ..     | ..    | ..    | ..     | ..      | 0.3     | 4.5   | 1      |
| b_25 | Monroe County NY, and Davidson County TN, USA (Oct 2000 – Sep 2001) (Iwane et al, 2004) <sup>48</sup> | ARI             | Census-derived estimate | Nasal and throat swabs; Viral Culture and PCR                   | ..     | ..    | ..    | 1      | 0.5     | 0.2     | 2.4   | 0.6    |
| b_26 | Salt Lake County, Utah, USA (Jul 2001-Jun 2004) (Ampofo et al, 2006) <sup>49</sup>                    | ARI             | Census-derived estimate | NPA; DFA                                                        | ..     | ..    | ..    | 3.3    | 2.9     | 1       | 7.4   | 2.6    |
| b_27 | Philadelphia, USA (Jul 2000-Jun 2004) (Coffin et al, 2007) <sup>50</sup>                              | All             | Census-derived estimate | Nasal aspirates; SPIA, DFA and viral culture                    | ..     | ..    | ..    | ..     | ..      | 0.7     | ..    | 2.1    |
| b_28 | Davidson County, USA (2003-2004) (Grijalva et al, 2006) <sup>51</sup>                                 | ARI; Fever      | Census-derived estimate | Nasal and throat swabs; Viral culture, PCR, RIDT, IFA, serology | ..     | ..    | ..    | ..     | ..      | 0.3     | 5.4   | 1.2    |
| b_3  | Soma and Shinchi, Japan (2002-2008) (from Nair et al, 2011) <sup>10</sup>                             | ARI AND Fever   | Defined population base | Nasal swabs; RIDT                                               | ..     | ..    | ..    | 33.7   | 37.3    | 24.3    | ..    | ..     |
| b_40 | Nashville, TN, USA (Aug 1974-Jul 1999) (Neuzil et al, 2002) <sup>15</sup>                             | ARI; Fever      | Defined population base | Nasal wash; Culture and HI or DFA                               | ..     | ..    | ..    | ..     | 3.5     | 0       | ..    | 2.3    |
| b_9  | Manhiça, Mozambique (Sep 2006-Sep 2007) (from Nair et al, 2011) <sup>10</sup>                         | ALRI            | Defined population base | NPA; PCR                                                        | ..     | ..    | ..    | 3      | 3.4     | 0.3     | 4.5   | 1.7    |
| e13  | Baguio City, Philippines (Jan 2012-Dec 2014) (Kamigaki et al, 2017) <sup>52</sup>                     | ALRI            | Census derived estimate | OPS or NPS; PCR                                                 | ..     | ..    | ..    | ..     | ..      | 3.6     | 8.7   | 7.2    |
| e26  | Australia (2006-2015) (Li-Kim-Moy et al, 2016) <sup>53</sup>                                          | ARI             | Census derived estimate | ..; ..                                                          | ..     | ..    | ..    | ..     | ..      | 0.4     | 1.9   | 0.8    |
| s103 | Memphis, Nashville, and Salt Lake City; urban (Jan 2010-Jun 2012) (Jain et al, 2015) <sup>54</sup>    | ALRI            | Census-derived estimate | NPS and OPS; PCR, serology                                      | ..     | ..    | ..    | ..     | ..      | 0.1     | ..    | 0.2    |
| s138 | Athens, Greece (2002-2003; 2004-2005) (Sakkou et al, 2011) <sup>55</sup>                              | ARI; Fever      | Census-derived estimate | NPA; PCR                                                        | ..     | ..    | ..    | ..     | ..      | ..      | ..    | ..     |

| ID    | Location (reference)                                                                                  | Case Definition | Denominator source      | Specimen and diagnostic test  | 0-27 d | 1-2 m | 3-5 m | 6-11 m | 12-23 m | 24-59 m | 0-5 m | 0-59 m |
|-------|-------------------------------------------------------------------------------------------------------|-----------------|-------------------------|-------------------------------|--------|-------|-------|--------|---------|---------|-------|--------|
| s140  | Turku, Finland; (Jul 1988-Jun 2004) (Silvennoinen et al, 2011) <sup>56</sup>                          | All             | Defined population base | NPA; IFA and RIDT             | ..     | ..    | ..    | ..     | ..      | ..      | 2.8   | ..     |
| up_10 | St. Elizabeth, Lwak, Asembo, Kenya; rural (2010-2014) (Chaves and colleagues)                         | ALRI            | Census-derived estimate | NPS and OPS; PCR              | 0      | 0     | 0     | 13.1   | 7.2     | 0.9     | 0     | 3.3    |
| up_11 | Siaya County, Kenya; rural (2010-2014) (Chaves and colleagues)                                        | ALRI            | Census-derived estimate | NPS and OPS; PCR              | 0      | 1.7   | 2.3   | 2.1    | 1.9     | 0.6     | 1.8   | 1.1    |
| up_13 | Soweto, Gauteng, South Africa; urban (Mar 1998 to Oct 2005) (Madhi and colleagues)                    | ALRI            | Defined population base | NPA; IFA                      | ..     | 3.4   | 4.3   | 2.1    | 1.8     | 0.3     | 4     | 1.1    |
| up_14 | Amman, Jordan; urban (Mar 2010-Mar 2013) (Khuri-Bulos and colleagues)                                 | ALRI            | Census-derived estimate | Nasal or throat swabs; PCR    | ..     | ..    | ..    | ..     | 0.2     | ..      | ..    | ..     |
| up_15 | Manhiça, Mozambique; rural (Jan 2011-June 2014) (Bassat and colleagues)                               | ALRI            | Census-derived estimate | NPA; PCR                      | 1.5    | 0.7   | 1.2   | 1.5    | 0.6     | 0.2     | 1.1   | 0.5    |
| up_16 | Kilifi, Kenya; rural and semi-urban (Jan 2007- Dec 2016) (Nokes and colleagues)                       | ALRI            | Census-derived estimate | NPS; PCR                      | 0.4    | 2.2   | 2.1   | 1.8    | 1.0     | 0.4     | 1.7   | 0.8    |
| up_17 | Muang District, Nakhon Phanom Province, Thailand (PERCH); rural (2012-2013) (O'Brien and colleagues)  | ALRI            | Census-derived estimate | NP/OP and induced sputum; PCR | ..     | ..    | ..    | ..     | 0       | 0.1     | ..    | 0.1    |
| up_18 | Muang District, Sa Kaeo Province, Thailand; rural (2012-2013) (O'Brien and colleagues)                | ALRI            | Census-derived estimate | NP/OP and induced sputum; PCR | ..     | ..    | ..    | ..     | 0.4     | 0.2     | ..    | 0.2    |
| up_19 | Nha Trang city, Vietnam; urban and sub-urban (2008-2013) (Yoshida and colleagues)                     | ALRI            | Census-derived estimate | NP specimens; PCR             | ..     | ..    | ..    | ..     | 1.4     | 0.2     | ..    | 0.7    |
| up_21 | Basse, Upper River Region, The Gambia (PERCH); rural (Nov 2011-Nov 2013) (O'Brien and colleagues)     | ALRI            | Census-derived estimate | NPS, OPS, induced sputum; PCR | ..     | 4.5   | 2.6   | 0.6    | 0.2     | 0.3     | 3.3   | 0.6    |
| up_22 | Bersheba, Israel (Sep-Mar 2011-2016) (Katz and colleagues)                                            | ARI; Fever      | Medical Records         | OP and nasal swabs; PCR       | 9.6    | 15.3  | 8.9   | 12.6   | 6       | 3.5     | 11.5  | 5.3    |
| up_23 | Nakhon Phanom and Sa Kaeo Provinces, Thailand; rural (Jan 2005-Dec 2011) (Thamthiawat and colleagues) | ARI             | Census-derived estimate | NPS; PCR                      | 0.6    | 2     | 4.2   | 9.1    | 9       | 4.4     | 2.9   | 5.6    |
| up_24 | Pune district, India; rural (May 2009-Apr 2013) (Hirve and colleagues)                                | ALRI            | Census-derived estimate | NPS; PCR                      | 0      | 0     | 0     | 1.2    | 0       | 0.1     | 0     | 0.2    |



| ID    | Location (reference)                                                                                                                                            | Case Definition | Denominator source      | Specimen and diagnostic test | 0-27 d | 1-2 m | 3-5 m | 6-11 m | 12-23 m | 24-59 m | 0-5 m | 0-59 m |
|-------|-----------------------------------------------------------------------------------------------------------------------------------------------------------------|-----------------|-------------------------|------------------------------|--------|-------|-------|--------|---------|---------|-------|--------|
| up_25 | Kamalapur, Bangladesh (2007-2014) (Brooks and colleagues)                                                                                                       | ALRI            | Defined population base | NPW; PCR and tissue culture  | 0      | 0.2   | 0.3   | 0.8    | 2.5     | 0.4     | 0.2   | 0.7    |
| up_26 | David City, Panama (2014-2016) (Jara and colleagues)                                                                                                            | ALRI            | Census-derived estimate | NPS or OPS; PCR              | ..     | ..    | ..    | ..     | 8.6     | 1.2     | ..    | 4.9    |
| up_27 | Ciudad de Buenos Aires, Argentina; urban (Jun 2008-Dec 2010) (Echavarría and colleagues)                                                                        | ALRI            | Defined population base | NPA; IFA                     | ..     | ..    | ..    | ..     | 4.4     | 0.6     | ..    | 4      |
| up_28 | Turku, Finland; urban (Jan 2010-Jun 2012) (Heikkinen and colleagues)                                                                                            | ALRI            | Census-derived estimate | Nasal swabs; TRFIA           | 1.1    | 4.9   | 0.3   | 0.7    | 0.7     | 0.1     | 2     | 0.5    |
| up_29 | Aurora, Colorado, USA; urban (Jan 2011-Oct 2015) (Simões and colleagues)                                                                                        | ALRI            | Census-derived estimate | ..; ..                       | ..     | ..    | ..    | ..     | 0.5     | 0.2     | ..    | 0.3    |
| up_3  | Paarl, Western Province, South Africa (Jun 2012-Dec 2016) (Zar and colleagues)                                                                                  | ALRI            | Defined population base | NPS; PCR                     | 21.1   | 28.0  | 7.2   | 7.9    | 1.1     | 1.1     | 17.1  | 5.6    |
| up_30 | Region VI Buenos Aires Province, Argentina; urban /slums/semi-rural (2011-2013) (Polack and colleagues)                                                         | ALRI            | Census-derived estimate | NPA; PCR                     | 0      | 2.0   | 4.3   | 2.1    | 1.4     | ..      | 2.9   | ..     |
| up_31 | Quetzaltenango, Guatemala (2010-2016) (McCracken and colleagues)                                                                                                | ALRI            | Census-derived estimate | NPS and OPS; PCR             | 0.8    | 2.4   | 1.3   | 0.9    | 0.6     | 0.1     | 1.6   | 0.5    |
| up_32 | Santa Rosa, Guatemala (2010-2016) (McCracken and colleagues)                                                                                                    | ALRI            | Census-derived estimate | NPS and OPS; PCR             | 2.8    | 2.9   | 1.4   | 0.7    | 1.3     | 0.1     | 2.1   | 0.6    |
| up_33 | Tagbilaran, Bohol, Philippines; Dausi, Baclayon, Panglao, Cortes, Balilihan, Bohol, Philippines; mixed urban-rural (July 2000-Dec 2004) (Lucero and colleagues) | ALRI            | Defined population base | NPA; Viral culture           | ..     | 0.8   | 3.0   | 3.0    | 1.3     | ..      | 2.4   | ..     |
| up_34 | Valencia Region, Spain (2014-2017) (Mira Iglesias and colleagues)                                                                                               | All             | Census-derived estimate | NPS and nasal swabs; PCR     | ..     | ..    | ..    | ..     | 1.3     | 0.3     | ..    | 0.9    |
| up_4  | Buenos Aires, Argentina; urban (2009-2016) (Gentile and colleagues)                                                                                             | ALRI            | Census-derived estimate | NPA; PCR                     | ..     | ..    | ..    | ..     | 3.4     | 1.1     | ..    | 2.6    |
| up_41 | Soweto, Gauteng, South Africa (2015-2017) (Madhi and colleagues)                                                                                                | ALRI            | Census-derived estimate | NPS; PCR                     | ..     | ..    | ..    | ..     | 1.8     | 0.4     | ..    | 2.3    |
| up_5  | Klerksdorp, North West Province, South Africa; peri-urban (2013-2015) (Cohen and colleagues)                                                                    | ALRI; Sepsis    | Census-derived estimate | NPA; PCR                     | 0      | 1.6   | 1.6   | 1.8    | 1.4     | 0.3     | 1.3   | 0.8    |

| ID   | Location (reference)                                                                                   | Case Definition | Denominator source      | Specimen and diagnostic test                                                 | 0-27 d | 1-2 m | 3-5 m | 6-11 m | 12-23 m | 24-59 m | 0-5 m | 0-59 m |
|------|--------------------------------------------------------------------------------------------------------|-----------------|-------------------------|------------------------------------------------------------------------------|--------|-------|-------|--------|---------|---------|-------|--------|
| up_6 | Pietermaritzburg, Kwa-Zulu Natal Province, South Africa; peri-urban (2013-2015) (Cohen and colleagues) | ALRI; Sepsis    | Census-derived estimate | NPA; PCR                                                                     | 0.9    | 1.3   | 1.5   | 2.0    | 0.7     | 0.1     | 1.3   | 0.5    |
| up_7 | Soweto, Gauteng, South Africa; urban (2009-2012) (Cohen and colleagues)                                | ALRI; Sepsis    | Census-derived estimate | NPA; PCR                                                                     | 1.7    | 1.7   | 1.4   | 1.4    | 0.7     | 0.1     | 1.6   | 0.5    |
| up_8 | Concepcion, Chile; mixed urban/rural (2012-2013) (Fasce and colleagues)                                | ALRI            | Census-derived estimate | NPA or NPS; PCR                                                              | ..     | ..    | ..    | ..     | 0.4     | 0.2     | ..    | 0.4    |
| up_9 | Iquique, Chile; mixed urban-rural (2012-2013) (Fasce and colleagues)                                   | ALRI            | Census-derived estimate | NPA; PCR                                                                     | ..     | ..    | ..    | ..     | 0.4     | 0.4     | ..    | 0.7    |
| 111  | New Haven County, CT, USA (Oct 2003-April 2010) (Yousey-Hindes et al, 2011) <sup>57</sup>              | Flu             | Census-derived estimate | NPS or OPS; Viral culture, DFA or IDFA, PCR, and RIDT                        | ..     | ..    | ..    | ..     | ..      | ..      | ..    | 1      |
| 116  | Kishoreganj, Bogra, Comilla and Barisal, Bangladesh (2010-2014) (Homaira et al, 2016) <sup>58</sup>    | ARI             | Census-derived estimate | Nasal and throat swabs; PCR                                                  | ..     | ..    | ..    | ..     | ..      | ..      | ..    | 0.4    |
| 4001 | Sohar, Oman (2008-2013) (Al-Awaidy et al, 2015) <sup>59</sup>                                          | ALRI            | Census-derived estimate | OP and NP swab; PCR                                                          | ..     | ..    | ..    | ..     | ..      | ..      | ..    | 0.3    |
| 4002 | Ibra, Oman (2008-2013) (Al-Awaidy et al, 2015) <sup>59</sup>                                           | ARI             | Census-derived estimate | OP and NP swab; PCR                                                          | ..     | ..    | ..    | ..     | ..      | ..      | ..    | 0.4    |
| 4003 | SQH, Oman (2008-2013) (Al-Awaidy et al, 2015) <sup>59</sup>                                            | ARI             | Census-derived estimate | OP and NP swab; PCR                                                          | ..     | ..    | ..    | ..     | ..      | ..      | ..    | 0.4    |
| 422  | El Salvador (2009-2012) (Descalzo et al, 2016) <sup>60</sup>                                           | All             | Census-derived estimate | Nasal and pharyngeal specimens; PCR and IFA                                  | ..     | ..    | ..    | ..     | ..      | ..      | ..    | 1.8    |
| 423  | Guatemala (2009-2012) (Descalzo et al, 2016) <sup>60</sup>                                             | All             | Census-derived estimate | Nasal and pharyngeal specimens; PCR and IFA                                  | ..     | ..    | ..    | ..     | ..      | ..      | ..    | 0.7    |
| 424  | Honduras (2009-2012) (Descalzo et al, 2016) <sup>60</sup>                                              | All             | Census-derived estimate | Nasal and pharyngeal specimens; PCR and IFA                                  | ..     | ..    | ..    | ..     | ..      | ..      | ..    | 0.9    |
| 425  | Nicaragua (2009-2012) (Descalzo et al, 2016) <sup>60</sup>                                             | All             | Census-derived estimate | Nasal and pharyngeal specimens; PCR and IFA                                  | ..     | ..    | ..    | ..     | ..      | ..      | ..    | 4.5    |
| b_18 | Madrid, Spain (1997-2003) (Rojo et al, 2006) <sup>61</sup>                                             | ARI; Fever      | Census-derived estimate | Nasal or throat aspirates; Viral culture and subsequent fluorescent staining | ..     | ..    | ..    | ..     | ..      | ..      | ..    | ..     |
| b_23 | South Australia, Australia (1996-2006) (D'Onise et al, 2008) <sup>62</sup>                             | ARI             | Census-derived estimate | ..; Viral Culture, PCR                                                       | ..     | ..    | ..    | ..     | ..      | ..      | ..    | 0.6    |
| b_30 | Milwaukee, Wisconsin, USA (Nov 1996- Oct 1998) (Henrickson et al, 2004) <sup>63</sup>                  | ARI; Fever      | Census-derived estimate | NPS, BAL, throat swabs, ETA; PCR, Tissue culture, EIA                        | ..     | ..    | ..    | ..     | ..      | ..      | ..    | 1.5    |
| b_31 | Rio de Janeiro, Brazil (1987-1989) (Sutmoller et al, 1995) <sup>64</sup>                               | ALRI            | Defined population base | NPA; IFA, viral culture                                                      | ..     | ..    | ..    | ..     | ..      | ..      | ..    | 2.5    |
| b_8  | Santa Rosa, Guatemala (2008) (from Nair et al, 2011) <sup>10</sup>                                     | ARI             | Census-derived estimate | NPS or OPS; PCR                                                              | ..     | ..    | ..    | ..     | ..      | ..      | ..    | 0.7    |

| ID      | Location (reference)                                                                                                                                                 | Case Definition | Denominator source      | Specimen and diagnostic test                | 0-27 d | 1-2 m | 3-5 m | 6-11 m | 12-23 m | 24-59 m | 0-5 m | 0-59 m |
|---------|----------------------------------------------------------------------------------------------------------------------------------------------------------------------|-----------------|-------------------------|---------------------------------------------|--------|-------|-------|--------|---------|---------|-------|--------|
| e14     | Ghana (May 2013-April 2015) (Ntiri et al, 2016) <sup>65</sup>                                                                                                        | ARI AND Fever   | Census derived estimate | NPS, OPS; PCR                               | ..     | ..    | ..    | ..     | ..      | ..      | ..    | 3      |
| e16     | England, United Kingdom (2010-2015) (Boddington et al, 2017) <sup>66</sup>                                                                                           | ARI AND Fever   | Census derived estimate | ..; PCR                                     | ..     | ..    | ..    | ..     | ..      | ..      | ..    | 0.3    |
| e25     | Germany (Jan 2005-Dec 2012) (Von Der Beck et al, 2017) <sup>67</sup>                                                                                                 | ARI             | Census derived estimate | ..; ..                                      | ..     | ..    | ..    | ..     | ..      | ..      | ..    | 0.3    |
| s134    | Hamilton County, Ohio (Cincinnati); Monroe County, New York (Rochester); and Davidson County, Tennessee (Nashville) (2004-2009) (Poehling et al, 2013) <sup>68</sup> | ARI; Fever      | Census-derived estimate | Nasal and throat swabs; PCR                 | ..     | ..    | ..    | ..     | ..      | ..      | ..    | 0.6    |
| s205    | Scotland, United Kingdom (Nov 2012-Apr 2013) (Harvala et al, 2014) <sup>69</sup>                                                                                     | ALRI            | Census-derived estimate | Nose and throat swabs; PCR                  | ..     | ..    | ..    | ..     | ..      | ..      | ..    | 2.8    |
| s207    | Leganes, Madrid, Spain (Oct 2011-Dec 2012) (Olabarrieta et al, 2015) <sup>70</sup>                                                                                   | ARI             | Defined population base | NPA; PCR                                    | ..     | ..    | ..    | ..     | ..      | ..      | ..    | ..     |
| s304    | Multistate, USA (Oct 2010-Apr 2011) (Chaves et al, 2013) <sup>71</sup>                                                                                               | Flu             | Census-derived estimate | NPS or OPS; Culture, DFA, IFA, RIDT, or PCR | ..     | ..    | ..    | ..     | ..      | ..      | ..    | 0.5    |
| up_12   | Tone and Cinkasse districts, Togo; mixed urban-rural (August 2011-Oct 2013 and Aug 2014-July 2015) (Moisi and colleagues)                                            | ALRI            | Census-derived estimate | NPA; PCR                                    | ..     | ..    | ..    | ..     | ..      | ..      | ..    | 0.1    |
| up_60_2 | Soweto, South Africa (March 2011-May 2013) (Omer and colleagues)                                                                                                     | ALRI            | Defined population base | NPS, PCR                                    | 0      | 5.6   | ..    | ..     | ..      | ..      | 3.9   | ..     |
| f008    | Kinshasa Province, Congo, Dem. Rep (2013-2015) (Babakazo et al, 2018) <sup>72</sup>                                                                                  | ALRI            | Census-derived estimate | OPS and NPS; PCR                            | ..     | ..    | ..    | ..     | ..      | ..      | ..    | 2.3    |
| f047A   | Svay Rieng, Cambodia (2015) (Ieng et al, 2018) <sup>73</sup>                                                                                                         | ALRI-Fever      | Census-derived estimate | NPS; PCR                                    | ..     | ..    | ..    | ..     | ..      | ..      | ..    | 0.1    |
| f047B   | Siem Reap, Cambodia (2016) (Ieng et al, 2018) <sup>73</sup>                                                                                                          | ALRI-Fever      | Census-derived estimate | NPS; PCR                                    | ..     | ..    | ..    | ..     | ..      | ..      | ..    | 2.6    |
| f047C   | Kampong Cham, Cambodia (2016) (Ieng et al, 2018) <sup>73</sup>                                                                                                       | ALRI-Fever      | Census-derived estimate | NPS; PCR                                    | ..     | ..    | ..    | ..     | ..      | ..      | ..    | 3.9    |
| f070    | Rwanda (2012-2014) (Nyamusore et al, 2018) <sup>74</sup>                                                                                                             | ARI-Fever       | Census-derived estimate | NPS and OPS; PCR                            | ..     | ..    | ..    | ..     | ..      | ..      | ..    | 1.7    |
| f071    | Spain (2010-2016) (Oliva et al, 2018) <sup>30</sup>                                                                                                                  | ALRI            | Census-derived estimate | Respiratory swab; ..                        | ..     | ..    | ..    | ..     | ..      | ..      | ..    | 0.2    |
| f087    | Chile (2012-2014) (Sotomayor et al, 2018) <sup>75</sup>                                                                                                              | ARI-Fever       | Census-derived estimate | NPA and NPS; PCR and IF                     | ..     | ..    | ..    | ..     | ..      | ..      | ..    | 0.7    |
| f090A   | Deli Serdang, Indonesia (2013-2016) (Susilarini et al, 2018) <sup>76</sup>                                                                                           | ARI-Fever       | Census-derived estimate | Respiratory specimen; PCR                   | ..     | ..    | ..    | ..     | ..      | ..      | ..    | 1.5    |

| <b>ID</b> | <b>Location (reference)</b>                                                | <b>Case Definition</b> | <b>Denominator source</b> | <b>Specimen and diagnostic test</b> | <b>0-27 d</b> | <b>1-2 m</b> | <b>3-5 m</b> | <b>6-11 m</b> | <b>12-23 m</b> | <b>24-59 m</b> | <b>0-5 m</b> | <b>0-59 m</b> |
|-----------|----------------------------------------------------------------------------|------------------------|---------------------------|-------------------------------------|---------------|--------------|--------------|---------------|----------------|----------------|--------------|---------------|
| f090B     | Balikpapan, Indonesia (2013-2016) (Susilarini et al, 2018) <sup>76</sup>   | ARI-Fever              | Census-derived estimate   | Respiratory specimen; PCR           | ..            | ..           | ..           | ..            | ..             | ..             | ..           | 6.1           |
| f090C     | Gunung Kidul, Indonesia (2013-2016) (Susilarini et al, 2018) <sup>76</sup> | ARI-Fever              | Census-derived estimate   | Respiratory specimen; PCR           | ..            | ..           | ..           | ..            | ..             | ..             | ..           | 2.5           |
| f118      | Beijing, China (2014-2016) (Zhang et al, 2018) <sup>77</sup>               | ARI-Fever              | Census-derived estimate   | Throat swab; PCR                    | ..            | ..           | ..           | ..            | ..             | ..             | ..           | 4.3           |
| f207      | Beijing, China (2017-2018) (Zhao et al, 2018) <sup>78</sup>                | ARI-Fever              | Census-derived estimate   | Throat swab; PCR                    | ..            | ..           | ..           | ..            | ..             | 5.3            | ..           | 5.0           |
| f231      | Oman (2012-2015) (Doaa M. Abdel-Hady et al, 2018) <sup>79</sup>            | ARI                    | Census-derived estimate   | Respiratory specimen; PCR           | ..            | ..           | ..           | ..            | ..             | ..             | ..           | 0.8           |

**Supplementary table 26: Description of studies reporting hospitalisation rates of IFV-associated ALRI with hypoxemia in children under 5 years (per 1,000 children per year) \*†**

| ID    | Location (reference)                                                                     | Case Definition | Denominator source      | Specimen and diagnostic test | 0-27 d | 1-2 m | 3-5 m | 6-11 m | 12-23 m | 24-59 m | 0-5 m | 0-59 m |
|-------|------------------------------------------------------------------------------------------|-----------------|-------------------------|------------------------------|--------|-------|-------|--------|---------|---------|-------|--------|
| up_10 | St. Elizabeth, Lwak, Asembo, Kenya; Rural (2010-2014) (Chaves and colleagues)            | sALRI           | Census-derived estimate | NPS and OPS; PCR             | 0      | 0     | 0     | 7.8    | 2.4     | 0       | 0     | 1.3    |
| up_11 | Siaya County, Kenya; Rural (2010-2014) (Chaves and colleagues)                           | sALRI           | Census-derived estimate | NPS and OPS; PCR             | 0      | 1.2   | 1.5   | 1.5    | 1.4     | 0.6     | 1.2   | 0.9    |
| up_13 | Soweto, Gauteng, South Africa; urban (Mar 1998-Oct 2005) (Madhi and colleagues)          | sALRI           | Defined population base | NPA; IFA                     | ..     | 0.8   | 1.3   | 0.7    | 0.5     | 0.1     | 1.1   | 0.3    |
| up_14 | Amman, Jordan; urban (Mar 2010-Mar 2013) (Khuri-Bulos and colleagues)                    | sALRI           | Census-derived estimate | Nasal or throat swabs; PCR   | ..     | ..    | ..    | ..     | 0       | ..      | ..    | ..     |
| up_15 | Manhiça, Mozambique; rural (Jan 2011-Jun 2014) (Bassat and colleagues)                   | sALRI           | Census-derived estimate | NPA; PCR                     | 0      | 0     | 0     | 0.6    | 0.2     | 0       | 0     | 0.1    |
| up_16 | Kilifi, Kenya; rural and semi-urban (Jan 2007-Dec 2016) (Nokes and colleagues)           | sALRI           | Census-derived estimate | NPS; PCR                     | 0.1    | 0.4   | 0.6   | 0.3    | 0.2     | 0.1     | 0.4   | 0.1    |
| up_19 | Nha Trang city, Vietnam; urban and sub-urban (2008-2013) (Yoshida and colleagues)        | sALRI           | Census-derived estimate | NP specimens; PCR            | ..     | ..    | ..    | ..     | 0.2     | 0.1     | ..    | 0.2    |
| up_24 | Pune district, India; rural (May 2009 - Apr 2013) (Hirve and colleagues)                 | sALRI           | Census-derived estimate | NPS; PCR                     | 0      | 0     | 0     | 0      | 0.3     | 0       | 0     | ..     |
| up_27 | Ciudad de Buenos Aires, Argentina; urban (Jun 2008-Dec 2010) (Echavarría and colleagues) | sALRI           | Defined population base | NPA; IFA                     | ..     | ..    | ..    | ..     | 1.1     | 0       | ..    | 0.3    |
| up_29 | Aurora, Colorado, United States; urban (Jan 2011-Oct 2015) (Simões and colleagues)       | sALRI           | Census-derived estimate | ..                           | ..     | ..    | ..    | ..     | 0.3     | 0.1     | ..    | 0.2    |

\* NPA: nasopharyngeal aspirate. NPS: nasopharyngeal swab. NPW: nasopharyngeal wash. OPS: oropharyngeal swab. PCR: polymerase chain reaction. IF: immunofluorescence. IFA: indirect immunofluorescence assay. DFA: direct fluorescent antibody. ELISA: enzyme-linked immunosorbent assay. HI: hemagglutination-inhibition assay. RIDT: rapid influenza diagnostic test. MN: micro-neutralization assay. TRFIA: time-resolved fluoroimmunoassay. sALRI: hospitalised ALRI with hypoxemia, or ALRI in ICU or requiring MV. All: all diagnosis related to influenza (including influenza & pneumonia and other non-respiratory illnesses). Flu: evidence of a positive influenza test.

† Hospitalisation rates were adjusted for the proportion of testing in hospitalised ALRI patients where available.

| ID    | Location (reference)                                                                                                                                                | Case Definition     | Denominator source      | Specimen and diagnostic test | 0-27 d | 1-2 m | 3-5 m | 6-11 m | 12-23 m | 24-59 m | 0-5 m | 0-59 m |
|-------|---------------------------------------------------------------------------------------------------------------------------------------------------------------------|---------------------|-------------------------|------------------------------|--------|-------|-------|--------|---------|---------|-------|--------|
| up_30 | Region VI Buenos Aires Province, Argentina; urban /slums/semi-rural (2011-2013) (Polack and colleagues)                                                             | sALRI AND SpO2 <93% | Census-derived estimate | NPA; PCR                     | 0      | 0.7   | 0.9   | 1.3    | 0.6     | ..      | 0.7   | ..     |
| up_31 | Quetzaltango, Guatemala (2010-2016) (McCracken and colleagues)                                                                                                      | sALRI               | Census-derived estimate | NPS and OPS; PCR             | 0.8    | 2.4   | 1.2   | 0.8    | 0.6     | 0.1     | 1.5   | 0.4    |
| up_32 | Cuilapa, Santa Rosa, Guatemala (2010-2016) (McCracken and colleagues)                                                                                               | sALRI               | Census-derived estimate | NPS and OPS; PCR             | 1.8    | 2.9   | 1.2   | 0.6    | 0.8     | 0.1     | 1.8   | 0.5    |
| up_33 | Tagbilaran City, Bohol, Philippines; Dausi, Baclayon, Panglao, Cortes, Balilihan, Bohol, Philippines; mixed urban-rural (Jul 2000-Dec 2004) (Lucero and colleagues) | sALRI               | Defined population base | NPA; Viral culture           | ..     | 0     | 0.9   | 0      | 0.1     | ..      | 0.7   | ..     |
| up_34 | Valencia Region, Spain (2014-2017) (Mira Iglesias and colleagues)                                                                                                   | All                 | Census-derived estimate | NPS and nasal swabs; PCR     | ..     | ..    | ..    | ..     | 0       | 0       | ..    | 0.0    |
| up_4  | Buenos Aires, Argentina; urban (2009-2016) (Gentile and colleagues)                                                                                                 | sALRI               | NA                      | NPA; PCR                     | ..     | ..    | ..    | ..     | 3.2     | 1.1     | ..    | 2.5    |
| up_12 | Tone and Cinkasse districts, Togo; mixed urban-rural (Aug 2011-Oct 2013; Aug 2014-Jul 2015) (Moïsi and colleagues)                                                  | sALRI               | Census-derived estimate | NPA; PCR                     | ..     | ..    | ..    | ..     | ..      | ..      | ..    | 0      |

**Supplementary table 27: Description of studies reporting hospitalisation rates of IFV-associated very severe ALRI in children under five years (per 1,000 children per year) <sup>\*†</sup>**

| ID    | Location (reference)                                                                                 | Case Definition                                | Denominator source      | Specimen and diagnostic test  | 0-27 d | 1-2 m | 3-5 m | 6-11 m | 12-23 m | 24-59 m | 0-5 m | 0-59 m |
|-------|------------------------------------------------------------------------------------------------------|------------------------------------------------|-------------------------|-------------------------------|--------|-------|-------|--------|---------|---------|-------|--------|
| 146   | France (2009-2013) (Bonmarin et al, 2015) <sup>80</sup>                                              | Flu AND ICU                                    | Census-derived estimate | ..                            | ..     | ..    | ..    | ..     | ..      | ..      | ..    | 0      |
| 66    | Australia (1997-2013) (Kaczmarek et al, 2016) <sup>81</sup>                                          | Flu AND ICU                                    | Census-derived estimate | ..                            | ..     | ..    | ..    | ..     | ..      | ..      | ..    | 0      |
| up_10 | St. Elizabeth, Lwak, Asembo, Kenya; rural (2010-2014) (Chaves and colleagues)                        | ALRI AND ICU; MV; danger signs                 | Census-derived estimate | NPS and OPS; PCR              | 0      | 0     | 0     | 5.2    | 2.4     | 0       | 0     | 1.0    |
| up_11 | Siaya County, Kenya; rural (2010-2014) (Chaves and colleagues)                                       | ALRI AND ICU; MV; danger signs                 | Census-derived estimate | NPS and OPS; PCR              | 0      | 0.6   | 1.5   | 1.3    | 1.4     | 0.5     | 1     | 0.8    |
| up_13 | Soweto, Gauteng, South Africa; urban (Mar 1998-Oct 2005) (Madhi and colleagues)                      | ALRI AND ICU; MV; danger signs                 | Defined population base | NPA; IFA                      | ..     | 0     | 0     | 0      | 0       | 0       | 0     | 0      |
| up_14 | Amman, Jordan; urban (Mar 2010-Mar 2013) (Khuri-Bulos and colleagues)                                | ALRI AND ICU; MV; danger signs                 | Defined population base | Nasal/throat swabs; PCR       | ..     | ..    | ..    | ..     | 0       | ..      | ..    | ..     |
| up_15 | Manhiça, Mozambique; rural (Jan 2011-Jun 2014) (Bassat and colleagues)                               | ALRI AND ICU; MV; danger signs                 | Census-derived estimate | NPA; PCR                      | 0      | 0     | 0     | 0.6    | 0.2     | 0       | 0     | 0.1    |
| up_16 | Kilifi, Kenya; rural and semi-urban (Jan 2007- Dec 2016) (Nokes and colleagues)                      | ALRI AND ICU; MV; danger signs                 | Census-derived estimate | NPS; PCR                      | 0.2    | 0.9   | 1.1   | 0.4    | 0.3     | 0.1     | 0.8   | 0.3    |
| up_17 | Muang District, Nakhon Phanom Province, Thailand (PERCH); rural (2012-2013) (O'Brien and colleagues) | ALRI AND chest wall indrawing AND danger signs | Census-derived estimate | NP/OP and induced sputum; PCR | ..     | ..    | ..    | ..     | 0       | 0.1     | ..    | 0.1    |
| up_18 | Muang District, Sa Kaeo Province, Thailand; rural (2012-2013) (O'Brien and colleagues)               | ALRI AND chest wall indrawing AND danger signs | Census-derived estimate | NP/OP and induced sputum; PCR | ..     | ..    | ..    | ..     | 0.4     | 0.1     | ..    | 0.1    |
| up_19 | Nha Trang city, Vietnam; urban and sub-urban (2008-2013) (Yoshida and colleagues)                    | ALRI AND ICU; MV; danger signs                 | Census-derived estimate | NP specimens; PCR             | ..     | ..    | ..    | ..     | 0       | 0       | ..    | 0      |

\* NPA: nasopharyngeal aspirate. NPS: nasopharyngeal swab. NPW: nasopharyngeal wash. OPS: oropharyngeal swab. PCR: polymerase chain reaction. RT-PCR: reverse transcriptase polymerase chain reaction. IFA: indirect immunofluorescence assay. DFA: direct fluorescent antibody. ELISA: enzyme-linked immunosorbent assay. IF: immunofluorescence. HI: hemagglutination-inhibition assay. RIDT: rapid influenza diagnostic test. SPIA: Solid-phase immunoassay. EIA: enzyme immunoassay. MN: micro-neutralization assay. TRFIA: time-resolved fluoroimmunoassay. ICU: intensive care unit. MV: mechanical ventilation. All: all diagnosis related to influenza (including influenza & pneumonia and other non-respiratory illnesses). Flu: laboratory-confirmed influenza.

† Hospitalisation rates were adjusted for the proportion of testing in hospitalised ALRI patients.

| ID    | Location (reference)                                                                                                                                                | Case Definition                                | Denominator source                                | Specimen and diagnostic test | 0-27 d | 1-2 m | 3-5 m | 6-11 m | 12-23 m | 24-59 m | 0-5 m | 0-59 m |
|-------|---------------------------------------------------------------------------------------------------------------------------------------------------------------------|------------------------------------------------|---------------------------------------------------|------------------------------|--------|-------|-------|--------|---------|---------|-------|--------|
| up_21 | Basse, Upper River Region, The Gambia (PERCH); rural (Nov 2011-Nov 2013) (O'Brien and colleagues)                                                                   | ALRI AND chest wall indrawing AND danger signs | Census-derived estimate                           | NPS/OPS, induced sputum; PCR | ..     | 0     | 0     | 0.1    | 0       | 0.1     | 0     | 0      |
| up_22 | Bersheba, Israel (Sep-Mar 2011-2016) (Katz and colleagues)                                                                                                          | ARI; Fever AND ICU                             | Clalit Health Services Electronic Medical Records | OPS and nasal swabs; PCR     | 0      | 0.2   | 0.4   | 0.1    | 0       | 0       | 0.3   | 0.1    |
| up_23 | Nakhon Phanom and Sa Kaeo Provinces, Thailand; rural (Jan 2005-Dec 2011) (Thamtithiwat and colleagues)                                                              | Intubation or SpO2 <80 mmHg                    | Census-derived estimate                           | NPS; PCR                     | 0      | 0.2   | 0.1   | 0.7    | 0.5     | 0.1     | 0.2   | 0.3    |
| up_26 | David City, Panama (2014-2016) (Jara and colleagues)                                                                                                                | ALRI; ICU/MV/with danger signs                 | Census-derived estimate                           | NPS or OPS; PCR              | ..     | ..    | ..    | ..     | 0.4     | 0       | ..    | 0.6    |
| up_27 | Ciudad de Buenos Aires, Argentina; urban (Jun 2008-Dec 2010) (Echavarría and colleagues)                                                                            | ALRI AND ICU; MV; danger signs                 | Defined population base                           | NPA; IFA                     | ..     | ..    | ..    | ..     | 0       | 0       | ..    | 0      |
| up_28 | Turku, Finland; urban (Jan 2010-Jun 2012) (Heikkinen and colleagues)                                                                                                | ALRI AND ICU; MV; danger signs                 | Census-derived estimate                           | Nasal swabs; TRFIA           | 0      | 1     | 0     | 0      | 0.2     | 0       | 0.3   | 0.1    |
| up_29 | Aurora, Colorado, USA; urban (Jan 2011-Oct 2015) (Simões and colleagues)                                                                                            | ALRI AND ICU; MV; danger signs                 | Census-derived estimate                           | ..                           | ..     | ..    | ..    | ..     | 0       | 0       | ..    | 0      |
| up_30 | Region VI Buenos Aires Province, Argentina; urban /slums/semi-rural (2011-2013) (Polack and colleagues)                                                             | ALRI AND ICU; MV; danger signs                 | Census-derived estimate                           | NPA; PCR                     | 0      | 0     | 0.6   | 0.4    | 0       | ..      | 0.3   | ..     |
| up_31 | Quetzaltenango, Guatemala (2010-2016) (McCracken and colleagues)                                                                                                    | ALRI; ICU/MV/with danger signs                 | Census-derived estimate                           | NPS and OPS; PCR             | 0.8    | 2.4   | 1.1   | 0.8    | 0.5     | 0.1     | 1.5   | 0.4    |
| up_32 | Cuilapa, Santa Rosa, Guatemala (2010-2016) (McCracken and colleagues)                                                                                               | ALRI; ICU/MV/with danger signs                 | Census-derived estimate                           | NPS and OPS; PCR             | 1.8    | 2.9   | 1.2   | 0.6    | 0.8     | 0.1     | 1.8   | 0.5    |
| up_33 | Tagbilaran City, Bohol, Philippines; Dauis, Baclayon, Panglao, Cortes, Balilihan, Bohol, Philippines; mixed urban-rural (Jul 2000-Dec 2004) (Lucero and colleagues) | ALRI; ICU/MV/with danger signs                 | Defined population base                           | NPA; Viral culture           | ..     | 0     | 0.9   | 0      | 0       | ..      | 0.7   | ..     |
| up_34 | Valencia Region, Spain (2014-2017) (Mira Iglesias and colleagues)                                                                                                   | All AND ICU; MV; danger signs                  | Census-derived estimate                           | NPS and nasal swabs; PCR     | ..     | ..    | ..    | ..     | 0       | 0       | ..    | 0      |



| ID    | Location (reference)                                                                                               | Case Definition                | Denominator source      | Specimen and diagnostic test                      | 0-27 d | 1-2 m | 3-5 m | 6-11 m | 12-23 m | 24-59 m | 0-5 m | 0-59 m |
|-------|--------------------------------------------------------------------------------------------------------------------|--------------------------------|-------------------------|---------------------------------------------------|--------|-------|-------|--------|---------|---------|-------|--------|
| up_4  | Buenos Aires, Argentina; urban (2009-2016) (Gentile and colleagues)                                                | ALRI AND ICU; MV; danger signs | Census-derived estimate | NPA; PCR                                          | ..     | ..    | ..    | ..     | 0.6     | 0.2     | ..    | 0.4    |
| up_8  | Concepcion, Chile; mixed urban/rural (2012-2013) (Fasce and colleagues)                                            | ALRI AND ICU; MV; danger signs | Census-derived estimate | NPA, NPS; PCR                                     | ..     | ..    | ..    | ..     | 0.1     | 0       | ..    | 0.1    |
| up_9  | Iquique, Chile; mixed urban-rural (2012-2013) (Fasce and colleagues)                                               | ALRI AND ICU; MV; danger signs | Census-derived estimate | NPA; PCR                                          | ..     | ..    | ..    | ..     | 0       | 0.1     | ..    | 0.1    |
| 118   | Denmark (2009-10; 2010-11) (Gubbels et al, 2013) <sup>82</sup>                                                     | Flu AND ICU                    | Sentinel surveillance   | ..; PCR                                           | ..     | ..    | ..    | ..     | ..      | ..      | ..    | 0      |
| 197   | Taiwan (June 2009-March 2011) (Chuang et al, 2012) <sup>83</sup>                                                   | Flu AND ICU                    | Census-derived estimate | Nasal and Throat swab; PCR, viral culture, and HI | ..     | ..    | ..    | ..     | ..      | ..      | ..    | 0.1    |
| e25   | Germany (Jan 2005-Dec 2012) (Von Der Beck et al, 2017) <sup>67</sup>                                               | ARI AND MV                     | Census derived estimate | ..                                                | ..     | ..    | ..    | ..     | ..      | ..      | ..    | 0      |
| up_12 | Tone and Cinkasse districts, Togo; mixed urban-rural (Aug 2011-Oct 2013; May 2014-Jul 2015) (Moisi and colleagues) | ALRI AND ICU; MV; danger signs | Census-derived estimate | NPA; PCR                                          | ..     | ..    | ..    | ..     | ..      | ..      | ..    | 0      |
| f071  | Spain (2010-2016) (Oliva, J et al, 2018) <sup>30</sup>                                                             | ALRI AND ICU                   | Census-derived estimate | Respiratory swab; ..                              | ..     | ..    | ..    | ..     | ..      | ..      | ..    | 0      |

**Supplementary table 28: Description of studies reporting IFV-ALRI in-hospital case fatality ratios (hCFRs) in children under 5 years\***

| ID   | Location (reference)                                                                 | Case definition            | Specimen and diagnostic test                   | 0-5 m |          | 6-11 m |          | 12-59 m |          | 0-59 m |          |
|------|--------------------------------------------------------------------------------------|----------------------------|------------------------------------------------|-------|----------|--------|----------|---------|----------|--------|----------|
|      |                                                                                      |                            |                                                | Cases | hCFR (%) | Cases  | hCFR (%) | Cases   | hCFR (%) | Cases  | hCFR (%) |
| b_10 | Bondo district, Kenya (Jun 2007-May 2009) (from Nair et al, 2011) <sup>10</sup>      | ALRI                       | NPS or OPS; PCR                                | ..    | ..       | ..     | ..       | ..      | ..       | 67     | 4.5      |
| b_13 | Multistate, USA (Oct-Apr 2003-2008) (Dawood et al, 2010) <sup>38</sup>               | ALRI                       | NPS or OPS; Viral culture, DFA, IFA, RIDT, PCR | 1121  | 0.3      | ..     | ..       | ..      | ..       | 3023   | 0.2      |
| b_15 | Gipuzoka, Spain (Jul 2001-Jun 2004) (Montes et al, 2005) <sup>40</sup>               | ARI                        | NPA; Viral culture and PCR                     | ..    | ..       | ..     | ..       | ..      | ..       | 70     | 0        |
| b_17 | Leicester, United Kingdom (Oct 2001- Jun 2002) (Nicholson et al, 2006) <sup>42</sup> | ARI                        | Nasal and throat swabs; PCR                    | ..    | ..       | ..     | ..       | ..      | ..       | 33     | 0        |
| b_20 | Hong Kong (July 1997- June 1999) (Nelson et al, 2007) <sup>44</sup>                  | ARI                        | NPA; Viral culture and serology                | ..    | ..       | ..     | ..       | ..      | ..       | 5471   | 0.1      |
| b_23 | South Australia, Australia (1996-2006) (D'Onise et al, 2008) <sup>62</sup>           | ARI                        | ..; Viral Culture, and PCR                     | ..    | ..       | ..     | ..       | ..      | ..       | 626    | 0.6      |
| b_26 | Salt Lake County, Utah, USA (Jul 2001-Jun 2004) (Ampofo et al, 2006) <sup>49</sup>   | ALRI                       | NPA; DFA                                       | 92    | 0        | ..     | ..       | ..      | ..       | 325    | 0.3      |
| b_27 | Philadelphia, USA (Jul 2000- Jun 2004) (Coffin et al, 2007) <sup>50</sup>            | All                        | Nasal aspirates; SPIA, DFA and viral culture   | ..    | ..       | ..     | ..       | ..      | ..       | 573    | 0.9      |
| b_32 | Jordan, Oman, and Egypt (Oct 2007-Nov 2009) (from Nair et al, 2011) <sup>10</sup>    | ALRI; Chest wall indrawing | ..; PCR                                        | ..    | ..       | ..     | ..       | ..      | ..       | 77     | 1.3      |
| b_33 | Hong Kong (Jan-Jun 2005) (Kwong et al, 2009) <sup>84</sup>                           | ARI; Fever                 | ..; RIDT                                       | ..    | ..       | ..     | ..       | ..      | ..       | 86     | 1.2      |
| b_34 | Canada (2003-2004) (Moore et al, 2006) <sup>85</sup>                                 | ARI; Fever                 | ..; Culture or DFA                             | 116   | 0        | ..     | ..       | ..      | ..       | 423    | 0.2      |
| b_35 | Parana State, Brazil (Jan 1996-Dec 2001) (Coelho et al, 2007) <sup>86</sup>          | ARI                        | NPA or BAL; IFA and culture                    | ..    | ..       | ..     | ..       | ..      | ..       | 45     | 6.7      |
| b_36 | Kuala Lumpur, Malaysia (2002-2007) (Sam et al, 2010) <sup>87</sup>                   | ARI                        | ..; DFA and culture                            | ..    | ..       | ..     | ..       | 73      | 2.7      | 116    | 2.6      |

\* NPA: nasopharyngeal aspirate. NPS: nasopharyngeal swab. NPW: nasopharyngeal wash. OPS: oropharyngeal swab. BAL: bronchoalveolar lavage. PCR: polymerase chain reaction. IFA: indirect immunofluorescence assay. DFA: direct fluorescent antibody. ELISA: enzyme-linked immunosorbent assay. IF: immunofluorescence. HI: hemagglutination-inhibition assay. RIDT: rapid influenza diagnostic test. SPIA: Solid-phase immunoassay. EIA: enzyme immunoassay. MN: micro-neutralization assay. TRFIA: time-resolved fluoroimmunoassay. ARI: any respiratory infections/symptoms (acute one of cough, sore throat, shortness of breath, coryza); ICD-codes for influenza & pneumonia (excluding non-respiratory manifestations); or acute infections (fever or <35 deg C) with any respiratory signs. ALRI: physician-diagnosed pneumonia and/or bronchiolitis, or WHO definition for ALRI applied by a health worker requiring hospitalisation. All: all diagnosis related to influenza (including influenza & pneumonia and other non-respiratory illnesses). SpO2: oxygen saturation.

| ID    | Location (reference)                                                                                 | Case definition | Specimen and diagnostic test                       | 0-5 m |          | 6-11 m |          | 12-59 m |          | 0-59 m |          |
|-------|------------------------------------------------------------------------------------------------------|-----------------|----------------------------------------------------|-------|----------|--------|----------|---------|----------|--------|----------|
|       |                                                                                                      |                 |                                                    | Cases | hCFR (%) | Cases  | hCFR (%) | Cases   | hCFR (%) | Cases  | hCFR (%) |
| b_8   | Santa Rosa, Guatemala (Jan 2008-Apr 2009) (from Nair et al, 2011) <sup>10</sup>                      | ARI             | NPS or OPS; PCR                                    | ..    | ..       | ..     | ..       | ..      | ..       | 8      | 25       |
| e11   | Islamabad Pakistan (Mar 2011-Apr 2012) (Bashir et al, 2017) <sup>88</sup>                            | ALRI            | NPS or OPS; PCR                                    | ..    | ..       | ..     | ..       | ..      | ..       | ..     | ..       |
| e18   | Izmir, Turkey (Oct 2014-May 2015) (Kanik et al, 2016) <sup>89</sup>                                  | ALRI            | NPS; PCR                                           | ..    | ..       | ..     | ..       | ..      | ..       | ..     | ..       |
| e20   | Australia (Jan 2011-Dec 2013) (Li-Kim-Moy et al, 2017) <sup>90</sup>                                 | ARI             | ..; PCR                                            | 99    | 0        | 80     | 0        | 297     | 0        | 476    | 0        |
| e25   | Germany (Jan 2005-Dec 2012) (Von Der Beck et al, 2017) <sup>67</sup>                                 | ARI             | ..                                                 | ..    | ..       | ..     | ..       | ..      | ..       | 6328   | 0.4      |
| e9    | Turkey (Dec 2012-March 2016) (Acar et al, 2017) <sup>91</sup>                                        | ARI; Fever      | NPS; PCR                                           | 8     | 0        | ..     | ..       | ..      | ..       | 61     | 3.3      |
| 1808  | Egypt, Jordan, Oman, Qatar and Yemen (2007-2014) (Horton et al, 2017) <sup>92</sup>                  | ARI             | NPS and OPS; PCR                                   | ..    | ..       | ..     | ..       | ..      | ..       | 762    | 2.5      |
| f023  | Multi-country (2010-2014) (Dananche et al, 2018) <sup>93</sup>                                       | ALRI            | Nasal swab and nasal aspirate; PCR                 | ..    | ..       | ..     | ..       | ..      | ..       | 86     | 3.5      |
| f025  | Bucharest, Romania (2016-2017) (Draganescu et al, 2018) <sup>94</sup>                                | ARI             | NPS or nasal swab; PCR                             | ..    | ..       | ..     | ..       | ..      | ..       | 58     | 1.7      |
| f029  | Multi-counrty (2013) (El Omeiri et al, 2018) <sup>95</sup>                                           | ALRI-Fever      | Combined nasal and OP swab or pharyngeal wash; PCR | ..    | ..       | ..     | ..       | ..      | ..       | ..     | ..       |
| f064  | Kutaisi, Georgia (2014-2017) (Machablishvili et al, 2018) <sup>96</sup>                              | ARI-Fever       | Oral and nasal swab; PCR                           | ..    | ..       | ..     | ..       | 165     | 1.2      | 242    | 0.8      |
| f067  | Maputo, Mozambique (2014-2016) (Nguenha et al, 2018) <sup>3</sup>                                    | ARI-Fever       | NPS or OPS; PCR                                    | 9     | 11.1     | 14     | 0        | 40      | 0        | 63     | 1.6      |
| f071  | Spain (2010-2016) (Oliva et al, 2018) <sup>30</sup>                                                  | ALRI            | Respiratory swab; PCR                              | ..    | ..       | ..     | ..       | ..      | ..       | 426    | 0.9      |
| f090  | Deli Serdang, Balikpapan, Gunung Kidul, Indonesia (2013-2016) (Susilarini et al, 2018) <sup>76</sup> | ARI-Fever       | Respiratory specimen; PCR                          | ..    | ..       | ..     | ..       | ..      | ..       | 114    | 0        |
| f099  | Catalonia, Spain (2014-2016) (Torner et al, 2018) <sup>97</sup>                                      | ALRI            | NPS; PCR and culture                               | ..    | ..       | ..     | ..       | ..      | ..       | 167    | 1.2      |
| f168  | Shenzhen, China (2014-2015) (Zhang et al, 2016) <sup>98</sup>                                        | ALRI            | NPS; DFA                                           | ..    | ..       | ..     | ..       | ..      | ..       | 127    | 0.8      |
| f173  | Wuhan, China (2016-2017) (Zhu et al, 2018) <sup>99</sup>                                             | ARI             | pharyngeal specimen; PCR                           | ..    | ..       | ..     | ..       | ..      | ..       | ..     | ..       |
| up_11 | Siaya County, Kenya; rural (2010-2014) (Chaves and colleagues)                                       | ALRI            | NPS or OPS; PCR                                    | 9     | 0        | 10     | 0        | 38      | 2.6      | 57     | 1.8      |
| up_12 | Tone and Cinkasse districts, Togo; mixed urban-rural (Aug                                            | ALRI            | NPA; PCR                                           | 1     | 0        | 5      | 0        | 14      | 0        | 20     | 0        |

| ID    | Location (reference)                                                                                                                         | Case definition | Specimen and diagnostic test  | 0-5 m |          | 6-11 m |          | 12-59 m |          | 0-59 m |          |
|-------|----------------------------------------------------------------------------------------------------------------------------------------------|-----------------|-------------------------------|-------|----------|--------|----------|---------|----------|--------|----------|
|       |                                                                                                                                              |                 |                               | Cases | hCFR (%) | Cases  | hCFR (%) | Cases   | hCFR (%) | Cases  | hCFR (%) |
| up_13 | 2011-Oct 2013; Aug 2014-July 2015) (Moïsi and colleagues)<br>Soweto, Gauteng, South Africa; urban (Mar 1998-Oct 2005) (Madhi and colleagues) | ALRI            | NPA; IFA                      | 28    | 3.6      | 20     | 10       | 50      | 2        | 98     | 4.1      |
| up_14 | Amman, Jordan; urban (Mar 2010-Mar 2013) (Khuri-Bulos and colleagues)                                                                        | ALRI            | Nasal/throat swabs; PCR       | 35    | 5.7      | 22     | 0        | ..      | ..       | ..     | ..       |
| up_15 | Manhiça, Mozambique; rural (Jan 2011-Jun 2014) (Bassat and colleagues)                                                                       | ALRI            | NPA; PCR                      | 5     | 0        | 7      | 14.3     | 11      | 0        | 23     | 4.3      |
| up_16 | Kilifi, Kenya; rural and semi-urban (Jan 2007- Dec 2016) (Nokes and colleagues)                                                              | ALRI            | NPS; PCR                      | 33    | 6.1      | 26     | 11.5     | 59      | 3.4      | 118    | 5.9      |
| up_17 | Muang District, Nakhon Phanom Province, Thailand (PERCH); rural (2012-2013) (O'Brien and colleagues)                                         | ALRI            | NP/OP and induced sputum; PCR | ..    | ..       | 1      | 0        | 1       | 0        | 2      | 0        |
| up_18 | Muang District, Sa Kaeo Province, Thailand; rural (2012-2013) (O'Brien and colleagues)                                                       | ALRI            | NP/OP and induced sputum; PCR | ..    | ..       | ..     | ..       | 3       | 33.3     | 3      | 33.3     |
| up_19 | Nha Trang city, Vietnam; urban and sub-urban (2008-2013) (Yoshida and colleagues)                                                            | ALRI            | NP specimens; PCR             | 4     | 0        | 6      | 0        | 35      | 0        | 45     | 0        |
| up_20 | Berlin, Germany; urban (2010-2014) (Rath and colleagues)                                                                                     | ALRI            | NPS; PCR                      | 31    | 0        | 22     | 0        | 98      | 0        | 151    | 0        |
| up_21 | Basse, Upper River Region, Gambia (PERCH); rural (Nov 2011-Nov 2013) (O'Brien and colleagues)                                                | ALRI            | NPS, OPS, induced sputum; PCR | 17    | 0        | 4      | 0        | 12      | 0        | 33     | 0        |
| up_23 | Nakhon Phanom and Sa Kaeo Province, Thailand; rural (Jan 2005-Dec 2011) (Thamthiawat and colleagues)                                         | ALRI            | NPS; PCR                      | 34    | 0        | 110    | 0        | 559     | 0.2      | 703    | 0.1      |
| up_24 | Pune district, India; rural (May 2009-Apr 2013) (Hirve and colleagues)                                                                       | ALRI            | NPS; PCR                      | ..    | ..       | 2      | 0        | 2       | 0        | 4      | 0        |
| up_26 | David City, Panama (2014-2016) (Jara and colleagues)                                                                                         | ALRI            | NPS or OPS; PCR               | 14    | 21.4     | 15     | 13.3     | 30      | 0        | 59     | 8.5      |
| up_27 | Ciudad de Buenos Aires, Argentina; urban (Jun 2008-Dec 2010) (Echavarria and colleagues) <b>Error! Bookmark not defined.</b>                 | ALRI            | NPA; IFA                      | 5     | 0        | 2      | 0        | 5       | 0        | 12     | 0        |

| ID    | Location (reference)                                                                                                                                                | Case definition           | Specimen and diagnostic test | 0-5 m |          | 6-11 m |          | 12-59 m |          | 0-59 m |          |
|-------|---------------------------------------------------------------------------------------------------------------------------------------------------------------------|---------------------------|------------------------------|-------|----------|--------|----------|---------|----------|--------|----------|
|       |                                                                                                                                                                     |                           |                              | Cases | hCFR (%) | Cases  | hCFR (%) | Cases   | hCFR (%) | Cases  | hCFR (%) |
| up_28 | Turku, Finland; urban (Jan 2010-Jun 2012) (Heikkinen and colleagues)                                                                                                | ALRI                      | Nasal swabs; TRFIA           | 12    | 0        | 4      | 0        | 12      | 8.3      | 28     | 3.6      |
| up_29 | Aurora, Colorado, United States; urban (Jan 2011-Oct 2015) (Simões and colleagues)                                                                                  | ALRI                      | ..                           | 134   | 0        | 106    | 1.9      | 390     | 0.8      | 630    | 0.8      |
| up_3  | Paarl, Western Province, South Africa (June 2012-Dec 2016) (Zar and colleagues)                                                                                     | ALRI                      | NPS; PCR                     | 10    | 10       | 4      | 0        | 4       | 0        | 18     | 5.6      |
| up_30 | Region VI Buenos Aires Province, Argentina; urban /slums/semi-rural (2011-2013) (Polack and colleagues)                                                             | ALRI; Wheezing; SpO2 <93% | NPA; PCR                     | 26    | 3.8      | 20     | 0        | ..      | ..       | ..     | ..       |
| up_31 | Quetzaltenango, Guatemala (2010-2016) (McCracken and colleagues)                                                                                                    | ALRI                      | NPS and OPS; PCR             | 36    | 0        | 19     | 5.3      | 46      | 2.2      | 101    | 2.0      |
| up_32 | Cuilapa, Santa Rosa, Guatemala (2010-2016) (McCracken and colleagues)                                                                                               | ALRI                      | NPS and OPS; PCR             | 17    | 11.8     | 6      | 33.3     | 27      | 7.4      | 50     | 12.0     |
| up_33 | Tagbilaran City, Bohol, Philippines; Dauis, Baclayon, Panglao, Cortes, Balilihan, Bohol, Philippines; mixed urban-rural (Jul 2000-Dec 2004) (Lucero and colleagues) | ALRI                      | NPA; Viral culture           | 11    | 9.1      | 19     | 0        | ..      | ..       | ..     | ..       |
| up_34 | Valencia Region, Spain (2014-2017) (Mira Iglesias and colleagues)                                                                                                   | All                       | NPS and nasal swabs; RT-PCR  | 39    | 2.6      | 16     | 0        | 71      | 0        | 126    | 0.8      |
| up_4  | Buenos Aires, Argentina; urban (2009-2016) (Gentile and colleagues)                                                                                                 | ALRI                      | NPA; PCR                     | 21    | 4.8      | 29     | 0        | 49      | 4.1      | 99     | 3.0      |
| up_40 | Karachi, Sind, Pakistan (Jan 2009-Feb 2018) (Abbas and colleagues)                                                                                                  | ALRI                      | NP secretions; PCR           | ..    | ..       | ..     | ..       | 13      | 38.5     | 22     | 31.8     |
| up_41 | Soweto, Gauteng, South Africa (2015-2017) (Madhi and colleagues)                                                                                                    | ALRI; Sepsis              | NPS; PCR                     | 45    | 0        | 61     | 0        | 47      | 0        | 153    | 0        |
| up_42 | Rabat, Morocco (Nov 2010-Dec 2011) (Bassat and colleagues)                                                                                                          | ALRI                      | NPA; PCR                     | 3     | 0        | 9      | 0        | 16      | 6.2      | 28     | 3.6      |
| up_43 | Lusaka, Zambia (2011-2013) (O'Brien and colleagues)                                                                                                                 | ALRI                      | NPS, OPS, Induced sputum; .. | 11    | 27.3     | 7      | 14.3     | 13      | 15.4     | 31     | 19.4     |
| up_44 | Soweto, South Africa (2011-2013) (O'Brien and colleagues)                                                                                                           | ALRI                      | NPS, OPS, Induced sputum; .. | 18    | 0        | 15     | 6.7      | 21      | 4.8      | 53     | 3.8      |

| ID    | Location (reference)                                                                                   | Case definition | Specimen and diagnostic test | 0-5 m |          | 6-11 m |          | 12-59 m |          | 0-59 m |          |
|-------|--------------------------------------------------------------------------------------------------------|-----------------|------------------------------|-------|----------|--------|----------|---------|----------|--------|----------|
|       |                                                                                                        |                 |                              | Cases | hCFR (%) | Cases  | hCFR (%) | Cases   | hCFR (%) | Cases  | hCFR (%) |
| up_45 | Matlab, Bangladesh (2012-2013) (O'Brien and colleagues)                                                | ALRI            | NPS, OPS, Induced sputum; .. | 3     | 0        | 4      | 0        | 0       | ..       | 7      | 0        |
| up_46 | Dhaka, Bangladesh (2012-2013) (O'Brien and colleagues)                                                 | ALRI            | NPS, OPS, Induced sputum; .. | 1     | 0        | 0      | ..       | 2       | 0        | 3      | 0        |
| up_5  | Klerksdorp, North West Province, South Africa; peri-urban (2013-2015) (Cohen and colleagues)           | ALRI; Sepsis    | NPA; PCR                     | 5     | 0        | 7      | 0        | 18      | 0        | 30     | 0        |
| up_6  | Pietermaritzburg, Kwa-Zulu Natal Province, South Africa; peri-urban (2013-2015) (Cohen and colleagues) | ALRI; Sepsis    | NPA; PCR                     | 9     | 11.1     | 14     | 0        | 15      | 0        | 38     | 2.6      |
| up_7  | Soweto, Gauteng, South Africa; urban (2009-2012) (Cohen and colleagues)                                | ALRI; Sepsis    | NPA; PCR                     | 70    | 1.4      | 61     | 0        | 104     | 1        | 235    | 0.9      |
| up_8  | Concepcion, Chile; mixed urban/rural (2012-2013) (Fasce and colleagues)                                | ALRI            | NPA and NPS; PCR             | 12    | 8.3      | 6      | 0        | 18      | 0        | 36     | 2.8      |
| up_9  | Iquique, Chile; mixed urban-rural (2012-2013) (Fasce and colleagues)                                   | ALRI            | NPA; PCR                     | 5     | 0        | 9      | 0        | 17      | 0        | 31     | 0        |

**Supplementary table 29: Quality of studies reporting hospitalisation rates of IFV- (severe and very severe) ALRI in children under five years\***

| ID   | Location (Study period)            | Study design | Adjustment for health utilization † | Patient group excluded | Case definition | Sampling strategy | Diagnostic test | Hypoxemia ‡ |
|------|------------------------------------|--------------|-------------------------------------|------------------------|-----------------|-------------------|-----------------|-------------|
| 32   | United States of America;2003-2012 | Low          | Low                                 | Low                    | High            | High              | High            | NA          |
| 34§  | Hong Kong;2004-2011                | Low          | Low                                 | Low                    | High            | Low               | Low             | NA          |
| 66   | Australia;1997-2013                | High         | Low                                 | Low                    | Low             | High              | High            | NA          |
| 80   | Hong Kong;2005-2011                | High         | Low                                 | Low                    | High            | High              | Low             | NA          |
| 111  | United States of America;2003-2010 | Low          | Low                                 | Low                    | High            | High              | High            | NA          |
| 116  | Bangladesh;2010-2014               | Low          | Low                                 | Low                    | High            | Low               | Low             | NA          |
| 118  | Denmark;2009-2011                  | High         | Low                                 | Low                    | Low             | High              | Low             | NA          |
| 141  | Philippines;2009-2011              | Low          | High                                | Low                    | High            | Low               | Low             | NA          |
| 146  | France;2009-2013                   | High         | Low                                 | Low                    | Low             | High              | High            | NA          |
| 156  | China;2010-2012                    | Low          | Low                                 | Low                    | High            | Low               | Low             | NA          |
| 197  | Taiwan;2009-2011                   | High         | Low                                 | Low                    | Low             | High              | Low             | NA          |
| 422  | El Salvador;2009-2012              | High         | Low                                 | Low                    | High            | Low               | High            | NA          |
| 423  | Guatemala;2009-2012                | High         | Low                                 | Low                    | High            | Low               | High            | NA          |
| 424  | Honduras;2009-2012                 | High         | Low                                 | Low                    | High            | Low               | High            | NA          |
| 425  | Nicaragua;2009-2012                | High         | Low                                 | Low                    | High            | Low               | High            | NA          |
| 4001 | Oman;2008-2013                     | Low          | Low                                 | Low                    | Low             | Low               | Low             | NA          |
| 4002 | Oman;2008-2013                     | Low          | Low                                 | Low                    | High            | Low               | Low             | NA          |
| 4003 | Oman;2008-2013                     | Low          | Low                                 | Low                    | High            | Low               | Low             | NA          |
| b_10 | Kenya;2007-2009                    | Low          | Low                                 | Low                    | Low             | Low               | Low             | NA          |
| b_11 | Germany;1999-2001                  | Low          | Low                                 | Low                    | High            | Low               | Low             | NA          |
| b_13 | United States of America;2003-2008 | Low          | Low                                 | Low                    | High            | High              | High            | NA          |
| b_14 | Germany;1996-2000                  | High         | Low                                 | Low                    | High            | Low               | Low             | NA          |
| b_15 | Spain;2001-2004                    | High         | Low                                 | Low                    | High            | Low               | Low             | NA          |
| b_16 | United Kingdom;2002-2004           | Low          | Low                                 | Low                    | High            | Low               | Low             | NA          |
| b_17 | United Kingdom;2001-2002           | Low          | Low                                 | Low                    | High            | High              | Low             | NA          |
| b_18 | Spain;1997-2003                    | High         | Low                                 | Low                    | High            | High              | Low             | NA          |
| b_19 | Vietnam;2007-2008                  | Low          | Low                                 | Low                    | High            | Low               | Low             | NA          |
| b_20 | Hong Kong;1997-1999                | High         | Low                                 | Low                    | High            | High              | Low             | NA          |
| b_21 | Hong Kong;2003-2006                | Low          | Low                                 | Low                    | High            | Low               | High            | NA          |
| b_22 | China;2007-2008                    | High         | High                                | Low                    | High            | High              | High            | NA          |
| b_23 | Australia;1996-2006                | High         | Low                                 | Low                    | High            | High              | Low             | NA          |
| b_24 | United States of America;2001-2004 | Low          | Low                                 | Low                    | High            | Low               | Low             | NA          |
| b_25 | United States of America;2000-2001 | Low          | Low                                 | Low                    | High            | Low               | Low             | NA          |
| b_26 | United States of America;2001-2004 | High         | Low                                 | Low                    | High            | High              | High            | NA          |

\* Low: low risk of bias; high: high risk of bias

† Only for studies reporting hospitalisation rates

‡ NA: not applicable.

§ Combining Flu A and B in study ID - e12.

| ID    | Location (Study period)            | Study design | Adjustment for health utilization † | Patient group excluded | Case definition | Sampling strategy | Diagnostic test | Hypoxemia‡ |
|-------|------------------------------------|--------------|-------------------------------------|------------------------|-----------------|-------------------|-----------------|------------|
| b_27  | United States of America;2000-2004 | High         | High                                | Low                    | High            | High              | Low             | NA         |
| b_28  | United States of America;2003-2005 | Low          | Low                                 | Low                    | High            | Low               | High            | NA         |
| b_3   | Japan;2002-2008                    | Low          | Low                                 | Low                    | High            | Low               | High            | NA         |
| b_30  | United States of America;1996-1998 | High         | Low                                 | Low                    | High            | High              | High            | NA         |
| b_31  | Brazil;1987-1989                   | Low          | High                                | Low                    | Low             | Low               | Low             | NA         |
| b_40  | United States of America;1974-1999 | Low          | Low                                 | Low                    | High            | Low               | Low             | NA         |
| b_8   | Guatemala;2008                     | Low          | Low                                 | Low                    | High            | Low               | Low             | NA         |
| b_9   | Mozambique;2006-2007               | Low          | Low                                 | Low                    | Low             | Low               | Low             | NA         |
| e12   | Hong Kong;2004-2014                | Low          | Low                                 | Low                    | High            | Low               | High            | NA         |
| e13   | Philippines;2012-2014              | Low          | Low                                 | Low                    | High            | Low               | Low             | NA         |
| e14   | Ghana;2013-2015                    | Low          | Low                                 | High                   | High            | Low               | Low             | NA         |
| e16   | United Kingdom;2010-2015           | Low          | Low                                 | Low                    | High            | Low               | Low             | NA         |
| e25   | Germany;2005-2012                  | High         | Low                                 | Low                    | High            | High              | High            | NA         |
| e26   | Australia;2006-2015                | High         | Low                                 | Low                    | High            | High              | High            | NA         |
| s103  | United States of America;2010-2012 | Low          | Low                                 | High                   | Low             | Low               | Low             | NA         |
| s134  | United States of America;2004-2009 | Low          | Low                                 | Low                    | High            | Low               | Low             | NA         |
| s138  | Greece;2002-2005                   | Low          | Low                                 | Low                    | High            | Low               | Low             | NA         |
| s140  | Finland;1988-2004                  | Low          | Low                                 | Low                    | High            | High              | High            | NA         |
| s205  | United Kingdom;2012-2013           | High         | Low                                 | Low                    | Low             | High              | Low             | NA         |
| s207  | Spain;2011-2012                    | Low          | Low                                 | High                   | High            | Low               | Low             | NA         |
| s304  | United States of America;2010-2011 | Low          | Low                                 | Low                    | High            | High              | High            | NA         |
| f023  | Multi-country; 2010-2014           | Low          | NA                                  | High                   | Low             | Low               | Low             | NA         |
| f025  | Romania; 2016-2017                 | Low          | NA                                  | Low                    | High            | Low               | Low             | NA         |
| f029  | Multi-country; 2013                | Low          | NA                                  | High                   | High            | High              | Low             | NA         |
| f064  | Georgia; 2014-2017                 | Low          | NA                                  | Low                    | High            | Low               | Low             | NA         |
| f067  | Mozambique; 2014-2016              | Low          | NA                                  | Low                    | High            | Low               | Low             | NA         |
| f071  | Spain; 2010-2016                   | High         | Low                                 | Low                    | Low             | High              | Low             | NA         |
| f090  | Indonesia; 2013-2016               | Low          | Low                                 | Low                    | High            | Low               | Low             | NA         |
| f099  | Spain; 2010-2015                   | Low          | NA                                  | Low                    | Low             | Low               | Low             | NA         |
| f168  | China; 2014-2015                   | High         | NA                                  | Low                    | Low             | High              | High            | NA         |
| f173  | China; 2016-2017                   | High         | NA                                  | Low                    | High            | High              | Low             | NA         |
| f008  | Congo, Dem. Rep; 2013-2015         | Low          | Low                                 | Low                    | Low             | Low               | Low             | NA         |
| f047A | Cambodia; 2015-2016                | Low          | Low                                 | Low                    | High            | Low               | Low             | NA         |
| f047B | Cambodia; 2015-2016                | Low          | Low                                 | Low                    | High            | Low               | Low             | NA         |
| f047C | Cambodia; 2015-2016                | Low          | Low                                 | Low                    | High            | Low               | Low             | NA         |
| f070  | Rwanda; 2012-2014                  | Low          | Low                                 | Low                    | High            | Low               | Low             | NA         |
| f087  | Chile; 2012-2014                   | Low          | Low                                 | Low                    | High            | Low               | Low             | NA         |
| f118  | China; 2014-2016                   | Low          | Low                                 | Low                    | High            | High              | Low             | NA         |
| f207  | China; 2017-2018                   | Low          | Low                                 | Low                    | High            | Low               | Low             | NA         |
| f231  | Oman; 2012-2015                    | High         | Low                                 | Low                    | High            | High              | Low             | NA         |



| ID     | Location (Study period)               | Study design | Adjustment for health utilization<br>† | Patient group excluded | Case definition | Sampling strategy | Diagnostic test | Hypoxemia‡ |
|--------|---------------------------------------|--------------|----------------------------------------|------------------------|-----------------|-------------------|-----------------|------------|
| up_10  | Kenya;2010-2014                       | Low          | Low                                    | Low                    | Low             | Low               | Low             | Low        |
| up_11  | Kenya;2010-2014                       | Low          | Low                                    | Low                    | Low             | Low               | Low             | Low        |
| up_12  | Togo;2011-2013;<br>2014-2015          | Low          | Low                                    | Low                    | Low             | Low               | Low             | Low        |
| up_13  | South Africa;1998 to<br>2005          | Low          | Low                                    | High                   | Low             | Low               | High            | High       |
| up_14  | Jordan;2010-2013                      | Low          | Low                                    | Low                    | Low             | Low               | Low             | Low        |
| up_15  | Mozambique;2011-<br>2014              | Low          | High                                   | Low                    | Low             | Low               | Low             | Low        |
| up_16  | Kenya;2007-2016                       | Low          | Low                                    | Low                    | Low             | Low               | Low             | Low        |
| up_17  | Thailand;2012-2013                    | Low          | Low                                    | High                   | Low             | Low               | Low             | NA         |
| up_18  | Thailand;2012-2013                    | Low          | Low                                    | High                   | Low             | Low               | Low             | NA         |
| up_19  | Vietnam;2008-2013                     | Low          | Low                                    | High                   | Low             | Low               | Low             | Low        |
| up_21  | Gambia;2011-2013                      | Low          | Low                                    | High                   | Low             | Low               | Low             | NA         |
| up_22  | Israel;2011-2016                      | Low          | High                                   | Low                    | High            | High              | Low             | NA         |
| up_23  | Thailand;2005-2011                    | Low          | Low                                    | Low                    | High            | Low               | Low             | NA         |
| up_24  | India;2009-2013                       | Low          | Low                                    | Low                    | Low             | Low               | Low             | High       |
| up_25  | Bangladesh;2007-<br>2015              | Low          | Low                                    | Low                    | Low             | Low               | Low             | NA         |
| up_26  | Pakistan;2012-2014                    | Low          | Low                                    | Low                    | Low             | High              | Low             | High       |
| up_27  | Argentina;2008-2010                   | Low          | Low                                    | High                   | Low             | Low               | High            | High       |
| up_28  | Finland;2010-2012                     | Low          | High                                   | Low                    | Low             | Low               | High            | NA         |
| up_29  | United States of<br>America;2011-2015 | High         | High                                   | Low                    | Low             | High              | High            | High       |
| up_3   | South Africa;2012-<br>2016            | Low          | Low                                    | Low                    | Low             | Low               | Low             | NA         |
| up_30  | Argentina;2011-2013                   | Low          | Low                                    | Low                    | Low             | Low               | Low             | High       |
| up_31  | Guatemala;2010-2016                   | Low          | Low                                    | Low                    | Low             | Low               | Low             | Low        |
| up_32  | Guatemala;2010-2016                   | Low          | Low                                    | Low                    | Low             | Low               | Low             | Low        |
| up_33  | Philippines;2000-2004                 | Low          | Low                                    | High                   | Low             | Low               | Low             | Low        |
| up_34  | Spain;2014-2017                       | Low          | Low                                    | Low                    | High            | Low               | Low             | High       |
| up_4   | Argentina;2009-2016                   | Low          | High                                   | Low                    | Low             | Low               | Low             | Low        |
| up_41  | South Africa;2015-<br>2017            | Low          | Low                                    | Low                    | Low             | High              | Low             | NA         |
| up_5   | South Africa;2013-<br>2015            | Low          | High                                   | Low                    | Low             | Low               | Low             | NA         |
| up_6   | South Africa;2013-<br>2015            | Low          | High                                   | Low                    | Low             | Low               | Low             | NA         |
| up_602 | South Africa;2011-<br>2013            | Low          | Low                                    | Low                    | Low             | Low               | Low             | NA         |
| up_7   | South Africa;2009-<br>2012            | Low          | Low                                    | Low                    | Low             | Low               | Low             | NA         |
| up_8   | Chile;2012-2013                       | Low          | High                                   | Low                    | Low             | Low               | Low             | NA         |
| up_9   | Chile;2012-2013                       | Low          | High                                   | Low                    | Low             | Low               | Low             | NA         |

**Supplementary table 30: Quality of studies reporting IFV-ALRI in-hospital case fatality ratios (hCFRs) in children under five years**

| ID    | Location (Study period)                         | Study design | Patient group excluded | Case definition | Sampling strategy |
|-------|-------------------------------------------------|--------------|------------------------|-----------------|-------------------|
| 1808  | Egypt, Jordan, Oman, Qatar and Yemen; 2007-2014 | Low          | Low                    | High            | High              |
| up_4  | Argentina; 2009-2016                            | Low          | Low                    | Low             | Low               |
| up_6  | South Africa; 2013-2015                         | Low          | Low                    | Low             | Low               |
| up_5  | South Africa; 2013-2015                         | Low          | Low                    | Low             | Low               |
| up_7  | South Africa; 2009-2012                         | Low          | Low                    | Low             | Low               |
| up_8  | Chile; 2012-2013                                | Low          | Low                    | Low             | Low               |
| up_9  | Chile; 2012-2013                                | Low          | Low                    | Low             | Low               |
| up_10 | Kenya; 2010-2014                                | Low          | Low                    | Low             | High              |
| up_11 | Kenya; 2010-2014                                | Low          | Low                    | Low             | High              |
| up_12 | Togo; 2011-2013; 2014-2015                      | Low          | Low                    | Low             | Low               |
| up_13 | South Africa; 1998 to 2005                      | Low          | High                   | Low             | Low               |
| up_14 | Jordan; 2010-2013                               | Low          | Low                    | Low             | Low               |
| up_15 | Mozambique; 2011-2014                           | Low          | Low                    | Low             | Low               |
| up_16 | Kenya; 2007-2016                                | Low          | Low                    | Low             | High              |
| up_17 | Thailand; 2012-2013                             | Low          | High                   | Low             | Low               |
| up_18 | Thailand; 2012-2013                             | Low          | High                   | Low             | Low               |
| up_19 | Viet Nam; 2008-2013                             | Low          | High                   | Low             | Low               |
| up_20 | Germany; 2010-2014                              | Low          | Low                    | Low             | Low               |
| up_21 | Gambia; 2011-2013                               | Low          | High                   | Low             | Low               |
| up_23 | Thailand; 2005-2011                             | Low          | Low                    | High            | High              |
| up_24 | India; 2009-2013                                | Low          | Low                    | Low             | Low               |
| up_27 | Argentina; 2008-2010                            | Low          | High                   | Low             | Low               |
| up_28 | Finland; 2010-2012                              | Low          | Low                    | Low             | Low               |
| up_29 | United States of America; 2011-2015             | High         | Low                    | Low             | High              |
| up_30 | Argentina; 2011-2013                            | Low          | Low                    | Low             | Low               |
| up_32 | Guatemala; 2010-2016                            | Low          | Low                    | Low             | Low               |
| up_31 | Guatemala; 2010-2016                            | Low          | Low                    | Low             | Low               |
| up_33 | Philippines; 2000-2004                          | Low          | High                   | Low             | High              |
| up_26 | Panama; 2012-2014                               | Low          | Low                    | Low             | High              |
| b_32  | Jordan, Oman, Egypt; 2007-2009                  | Low          | Low                    | Low             | Low               |
| b_8   | Guatemala; 2008                                 | Low          | Low                    | High            | Low               |
| b_10  | Kenya; 2007-2009                                | Low          | Low                    | Low             | Low               |
| b_15  | Spain; 2001-2004                                | High         | Low                    | High            | Low               |
| b_17  | United Kingdom; 2001-2002                       | Low          | Low                    | High            | High              |

| <b>ID</b> | <b>Location (Study period)</b>      | <b>Study design</b> | <b>Patient group excluded</b> | <b>Case definition</b> | <b>Sampling strategy</b> |
|-----------|-------------------------------------|---------------------|-------------------------------|------------------------|--------------------------|
| b_26      | United States of America; 2001-2004 | High                | Low                           | High                   | High                     |
| b_27      | United States of America; 2000-2004 | High                | Low                           | High                   | High                     |
| b_23      | Australia; 1996-2006                | High                | Low                           | High                   | High                     |
| b_33      | China; 2005                         | High                | High                          | High                   | High                     |
| b_34      | Canada; 2003-2004                   | High                | Low                           | High                   | High                     |
| b_13      | United States of America; 2003-2008 | Low                 | Low                           | High                   | High                     |
| b_35      | Brazil; 1996-2001                   | High                | Low                           | High                   | High                     |
| b_20      | China; 1997-1999                    | High                | Low                           | High                   | High                     |
| b_36      | Malaysia; 2002-2007                 | High                | Low                           | High                   | High                     |
| up_34     | Spain; 2014-2017                    | Low                 | Low                           | High                   | High                     |
| up_40     | Pakistan; 2010-2018                 | High                | Low                           | Low                    | High                     |
| up_41     | South Africa; 2015-2017             | Low                 | Low                           | Low                    | High                     |
| up_42     | Morocco; 2010-2011                  | Low                 | Low                           | Low                    | Low                      |
| up_3      | South Africa; 2012-2016             | Low                 | Low                           | Low                    | Low                      |
| e25       | Germany; 2005-2012                  | High                | Low                           | High                   | High                     |
| e9        | Turkey; 2012-2016                   | High                | Low                           | High                   | High                     |
| e11       | Pakistan; 2011-2012                 | Low                 | High                          | Low                    | Low                      |
| e18       | Turkey; 2014-2015                   | High                | High                          | Low                    | Low                      |
| e20       | Australia; 2011-2013                | High                | Low                           | High                   | High                     |
| f023      | Multi-county; 2010-2014             | Low                 | High                          | Low                    | Low                      |
| f025      | Bucharest, Romania; 2016-2017       | Low                 | Low                           | High                   | Low                      |
| f029      | Multi-country; 2013                 | Low                 | High                          | High                   | High                     |
| f064      | Georgia; 2014-2017                  | Low                 | Low                           | High                   | Low                      |
| f067      | Mozambique; 2014-2016               | Low                 | Low                           | High                   | Low                      |
| f071      | Spain; 2010-2016                    | High                | Low                           | Low                    | High                     |
| f090      | Indonesia; 2013-2016                | Low                 | Low                           | High                   | Low                      |
| f099      | Spain; 2010-2015                    | Low                 | Low                           | Low                    | Low                      |
| f168      | China; 2014-2015                    | High                | Low                           | Low                    | High                     |
| f173      | China; 2016-2017                    | High                | Low                           | High                   | High                     |
| up_43     | Zambia; 2011-2013                   | Low                 | High                          | Low                    | Low                      |
| up_44     | South Africa; 2011-2013             | Low                 | High                          | Low                    | Low                      |
| up_45     | Bangladesh; 2012-2013               | Low                 | High                          | Low                    | Low                      |
| up_46     | Bangladesh; 2012-2013               | Low                 | High                          | Low                    | Low                      |

## Tables of meta-estimates of IFV-respiratory infections by finer age band in children 0-59 months

**Supplementary table 31: Incidence rate meta-estimates of IFV-episodes in children under five years**

|                             | 0-27 d |                   | 1-2 m |                  | 3-5 m |                   | 6-11 m |                    | 12-23 m |                     | 24-59 m |                   |
|-----------------------------|--------|-------------------|-------|------------------|-------|-------------------|--------|--------------------|---------|---------------------|---------|-------------------|
|                             | No *   | Rate <sup>†</sup> | No    | Rate             | No    | Rate              | No     | Rate               | No      | Rate                | No      | Rate              |
| Developing                  | 6      | 17.4 (4.4-66.2)   | 6     | 39.4 (16.2-92.4) | 3     | 76.2 (28.9-186.1) | 2      | 165.9 (93.2-277.8) | 4       | 167.3 (106.5-253)   | 4       | 196.8 (109.1-329) |
| Industrialised              | ..     | ..                | ..    | ..               | ..    | ..                | ..     | ..                 | 3       | 187.4 (116.9-286.7) | 4       | 79.1 (25.7-218.2) |
| Low and lower middle income | 5      | 16.4 (3.1-80.8)   | 5     | 31.7 (12.1-80.5) | 3     | 76.2 (28.9-186.1) | 2      | 165.9 (93.2-277.8) | 4       | 167.3 (106.5-253)   | 4       | 196.8 (109.1-329) |
| High income                 | ..     | ..                | ..    | ..               | ..    | ..                | ..     | ..                 | 3       | 187.4 (116.9-286.7) | 4       | 79.1 (25.7-218.2) |

\* No: number of studies.

† Rate: incidence rate per 1,000 children per year.

**Supplementary table 32: Incidence rate meta-estimates of IFV-ALRI in children under five years**

|                             | 0-27 d |               | 1-2 m |                | 3-5 m |                 | 6-11 m |                  | 12-23 m |                  | 24-59 m |               |
|-----------------------------|--------|---------------|-------|----------------|-------|-----------------|--------|------------------|---------|------------------|---------|---------------|
|                             | No *   | Rate†         | No    | Rate           | No    | Rate            | No     | Rate             | No      | Rate             | No      | Rate          |
| Developing                  | 5      | 0.2 (0-129.2) | 5     | 6.7 (1.1-40.4) | 5     | 12.8 (5.7-28.4) | 5      | 27.6 (23.4-32.6) | 7       | 30.7 (20.3-46.2) | 5       | 7.3 (2.9-18)  |
| Industrialised              | ..     | ..            | ..    | ..             | ..    | ..              | ..     | ..               | 2       | 11.7 (8.2-16.9)  | ..      | ..            |
| Low and lower middle income | ..     | ..            | 4     | 3.4 (0.9-12.2) | 4     | 8 (5.6-11.5)    | 4      | 28 (23.6-33.3)   | 6       | 32.8 (20.7-51.6) | 4       | 10.4 (5-21.8) |
| High income                 | ..     | ..            | ..    | ..             | ..    | ..              | ..     | ..               | 2       | 11.7 (8.2-16.9)  | ..      | ..            |

\* No: number of studies.

† Rate: incidence rate per 1,000 children per year.

**Supplementary table 33: Incidence rate meta-estimates of IFV-severe and very severe ALRI in children under five years**

|                             | 0-27 d |                | 1-2 m |                | 3-5 m |                | 6-11 m |                | 12-23 m |               | 24-59 m |               |
|-----------------------------|--------|----------------|-------|----------------|-------|----------------|--------|----------------|---------|---------------|---------|---------------|
|                             | No*    | Rate†          | No    | Rate           | No    | Rate           | No     | Rate           | No      | Rate          | No      | Rate          |
| <b>IFV-severe ALRI</b>      |        |                |       |                |       |                |        |                |         |               |         |               |
| Developing                  | 11     | 5.1 (2.1-12)   | 6     | 2.6 (0.3-19.4) | 4     | 2.8 (0.3-30.3) | 4      | 6.1 (2.2-16.4) | 5       | 4 (1.7-9.4)   | 4       | 0.7 (0.4-1.4) |
| Low and lower middle income | 10     | 4.4 (1.7-11.4) | 5     | 1.3 (0.3-6.1)  | 3     | 1 (0.1-14.2)   | 3      | 3.9 (1.4-11.1) | 4       | 2.6 (1.2-5.4) | 3       | 0.8 (0.4-1.6) |
| <b>IFV-very severe ALRI</b> |        |                |       |                |       |                |        |                |         |               |         |               |
| Developing                  | 4      | 0.3 (0-37.4)   | 4     | 0.1 (0-48.3)   | 4     | 0.1 (0-81)     | 4      | 1 (0.3-3.5)    | 4       | 1.2 (0.4-3.9) | 3       | 0.1 (0-1.3)   |
| Low and lower middle income | ..     | ..             | 3     | 0.1 (0-59.9)   | 3     | 0.2 (0-86.8)   | 3      | 0.8 (0.2-4)    | 3       | 0.8 (0.2-3.4) | 2       | 0.1 (0-1.6)   |

\* No: number of studies.

† Rate: incidence rate per 1,000 children per year.

**Supplementary table 34: Hospitalisation rate meta-estimates of IFV-ALRI in children under five years**

| Region                      | 0-27 d |               | 1-2 m |                | 3-5 m |               | 6-11 m |               | 12-23 m |               | 24-59 m |               |
|-----------------------------|--------|---------------|-------|----------------|-------|---------------|--------|---------------|---------|---------------|---------|---------------|
|                             | No *   | Rate †        | No    | Rate           | No    | Rate          | No     | Rate          | No      | Rate          | No      | Rate          |
| Developing                  | 15     | 0.8 (0.4-1.7) | 18    | 1.9 (1.2-3.0)  | 17    | 2 (1.5-2.7)   | 21     | 2.7 (1.7-4.3) | 36      | 1.6 (1-2.5)   | 36      | 0.7 (0.4-1.1) |
| Industrialised‡             | 2      | 4 (0.9-18.2)  | 2     | 9.0 (4.0-20.2) | 3     | 1.6 (0.3-7.7) | 7      | 2.6 (0.9-7.6) | 12      | 1.6 (0.8-3.3) | 17      | 0.5 (0.3-1)   |
| Low and Lower middle income | 8      | 0.6 (0.3-1.5) | 10    | 1.6 (0.9-2.8)  | 10    | 1.6 (1.2-2.2) | 11     | 1.5 (1-2.4)   | 14      | 1.4 (0.8-2.6) | 15      | 0.5 (0.2-0.8) |
| Upper middle income         | 7      | 1 (0.3-3.8)   | 8     | 2.6 (1.3-5.3)  | 7     | 2.8 (1.8-4.4) | 8      | 3.8 (1.7-8.3) | 16      | 1.4 (0.7-2.9) | 15      | 0.6 (0.3-1.4) |
| High income                 | 2      | 4 (0.9-18.2)  | 2     | 9.0 (4.0-20.2) | 3     | 1.6 (0.3-7.7) | 9      | 3.5 (1.4-8.8) | 18      | 2 (1.1-3.7)   | 23      | 0.8 (0.4-1.4) |

\* No: number of studies. Data in parentheses were numbers of imputed studies.

† Rate: hospitalisation rate per 1,000 children per year.

‡ For 0-27 d and 1-2 m, only two studies in Finland and Israel provided population-at-risk. Much higher rates were reported in the study in Israel, in which ARI and acute febrile illness was used as the case definition.

**Supplementary table 35: Hospitalisation rate meta-estimates of IFV-ALRI using the classic random model**

| Region                      | 0-27 d |               | 1-2 m |                | 3-5 m |                | 6-11 m |                | 12-23 m |               | 24-59 m |               |
|-----------------------------|--------|---------------|-------|----------------|-------|----------------|--------|----------------|---------|---------------|---------|---------------|
|                             | No*    | Rate †        | No    | Rate           | No    | Rate           | No     | Rate           | No      | Rate          | No      | Rate          |
| Developing                  | 15     | 1.6 (0.8-3.1) | 18    | 2.4 (1.6-3.6)  | 17    | 2.3 (1.7-3.1)  | 21     | 2.8 (1.7-4.6)  | 36      | 1.9 (1.3-2.7) | 36      | 0.8 (0.5-1.1) |
| Industrialised              | 2      | 4 (0.5-32.1)  | 2     | 8.9 (2.9-27.4) | 3     | 1.7 (0.3-10.4) | 7      | 2.6 (0.7-10)   | 12      | 1.7 (0.7-3.8) | 17      | 0.5 (0.3-0.9) |
| Low and lower middle income | 8      | 1.1 (0.6-2.2) | 10    | 2.3 (1.6-3.2)  | 10    | 1.8 (1.4-2.4)  | 11     | 1.7 (1.1-2.7)  | 14      | 1.6 (0.8-3.2) | 15      | 0.5 (0.2-1.0) |
| Upper middle income         | 7      | 2.2 (0.6-8.2) | 8     | 2.9 (1.4-6.2)  | 7     | 2.9 (1.8-4.9)  | 8      | 3.9 (1.3-11.8) | 16      | 1.7 (0.7-3.8) | 15      | 0.7 (0.2-1.8) |
| High income                 | 2      | 4 (0.5-32.1)  | 2     | 8.9 (2.9-27.4) | 3     | 1.7 (0.3-10.4) | 9      | 3.6 (1.1-11.1) | 18      | 2 (0.9-4.4)   | 23      | 0.8 (0.4-1.8) |

\* No: number of studies. Data in parentheses were numbers of imputed studies.

† Rate: hospitalisation rate per 1,000 children per year.



**Supplementary table 36: Hospitalisation rate meta-estimates of IFV-ALRI by subtypes in children under five years.**

|                                                        | 0-5 m |               | 6-11 m |               | 12-59 m |               |
|--------------------------------------------------------|-------|---------------|--------|---------------|---------|---------------|
|                                                        | No *  | Rate †        | No     | Rate          | No      | Rate          |
| <b>In studies reporting IFV-A and IFV-B</b>            |       |               |        |               |         |               |
| All IFV                                                |       |               |        |               |         |               |
| Developing                                             | 21    | 2.5 (1.5-4)   | 18     | 2.5 (1.5-4.2) | 24      | 0.7 (0.4-1.2) |
| Industrialised                                         | 3     | 4.1 (1.7-9.7) | 2      | 3 (0.4-24)    | 3       | 0.8 (0.2-3.2) |
| IFV-A                                                  |       |               |        |               |         |               |
| Developing                                             | 21    | 1.2 (0.6-2.5) | 18     | 1.4 (0.7-2.6) | 24      | 0.4 (0.2-0.7) |
| Industrialised                                         | 3     | 3.8 (1.6-8.7) | 2      | 2 (0.2-26)    | 3       | 0.7 (0.2-2.7) |
| IFV-B                                                  |       |               |        |               |         |               |
| Developing                                             | 21    | 0.6 (0.4-0.9) | 18     | 0.5 (0.2-0.9) | 24      | 0.1 (0.1-0.2) |
| Industrialised                                         | 3     | 0.4 (0.1-1.4) | 2      | 0.7 (0.3-1.7) | 3       | 0.2 (0-0.6)   |
| <b>In studies reporting H1N109pdm, H3N2, and IFV-B</b> |       |               |        |               |         |               |
| All IFV                                                |       |               |        |               |         |               |
| Developing                                             | 15    | 2 (1-3.9)     | 13     | 2.5 (1.3-4.8) | 17      | 0.9 (0.4-1.7) |
| Industrialised                                         | ..    | ..            | ..     | ..            | 2       | 0.4 (0.2-0.7) |
| H1N109pdm                                              |       |               |        |               |         |               |
| Developing                                             | 15    | 0.4 (0.1-1)   | 13     | 0.5 (0.2-1.4) | 17      | 0.2 (0.1-0.5) |
| Industrialised                                         | ..    | ..            | ..     | ..            | 2       | 0.1 (0.1-0.1) |
| H3N2                                                   |       |               |        |               |         |               |
| Developing                                             | 15    | 0.5 (0.2-1.1) | 13     | 0.5 (0.2-1.2) | 17      | 0.3 (0.1-0.6) |
| Industrialised                                         | ..    | ..            | ..     | ..            | 2       | 0.2 (0.1-0.4) |
| IFV-B                                                  |       |               |        |               |         |               |
| Developing                                             | 15    | 0.5 (0.2-1)   | 13     | 0.4 (0.2-1.1) | 17      | 0.2 (0.1-0.3) |
| Industrialised                                         | ..    | ..            | ..     | ..            | 2       | 0.1 (0-0.1)   |

\* No: number of studies.

† Rate: hospitalisation rate per 1,000 children per year.

**Supplementary table 37: Hospitalisation rate meta-estimates of IFV-ALRI with hypoxemia in children under 5 years**

|                             | 0-27 d |               | 1-2 m |               | 3-5 m |               | 6-11 m |               | 12-23 m |               | 24-59 m |               |
|-----------------------------|--------|---------------|-------|---------------|-------|---------------|--------|---------------|---------|---------------|---------|---------------|
|                             | No *   | Rate†         | No    | Rate          | No    | Rate          | No     | Rate          | No      | Rate          | No      | Rate          |
| Developing                  | 8      | 0.5 (0.2-1.2) | 10    | 1 (0.6-2)     | 10    | 1.1 (0.8-1.4) | 10     | 0.8 (0.5-1.1) | 14      | 0.4 (0.2-0.8) | 11      | 0.1 (0-0.3)   |
| Industrialised              | ..     | ..            | ..    | ..            | ..    | ..            | ..     | ..            | 2       | 0.2 (0-3.2)   | 2       | 0 (0-0.8)     |
| Low and lower middle income | 7      | 0.6 (0.2-1.2) | 8     | 1.1 (0.5-2.5) | 8     | 1 (0.7-1.5)   | 8      | 0.7 (0.3-1.4) | 9       | 0.4 (0.2-0.8) | 8       | 0.1 (0.1-0.3) |
| Upper middle income         | ..     | ..            | 2     | 0.7 (0.3-2)   | 2     | 1.1 (0.6-2)   | 2      | 1 (0.7-1.6)   | 5       | 0.4 (0.1-2)   | 3       | 0.2 (0-1.3)   |
| High income                 | ..     | ..            | ..    | ..            | ..    | ..            | ..     | ..            | 2       | 0.2 (0-3.2)   | 2       | 0 (0-0.8)     |

\* No: number of studies. Data in parentheses were the numbers of imputed studies.

† Rate: hospitalisation rate per 1,000 children per year.

**Supplementary table 38: Hospitalisation rate meta-estimates of IFV-very severe ALRI in children under 5 years**

|                             | 0-27 d |               | 1-2 m |               | 3-5 m |               | 6-11 m |               | 12-23 m |             | 24-59 m |             | 0-4 y |      |
|-----------------------------|--------|---------------|-------|---------------|-------|---------------|--------|---------------|---------|-------------|---------|-------------|-------|------|
|                             | No *   | Rate †        | No    | Rate          | No    | Rate          | No     | Rate          | No      | Rate        | No      | Rate        | No    | Rate |
| Developing                  | 9      | 0.5 (0.2-1.2) | 12    | 0.3 (0.1-1.3) | 12    | 0.5 (0.3-1)   | 12     | 0.4 (0.2-0.8) | 21      | 0.1 (0-0.3) | 18      | 0.1 (0-0.1) |       |      |
| Industrialised              | ..     | ..            | 2     | 0.5 (0.1-1.4) | 2     | 0.2 (0.1-0.9) | 2      | 0.1 (0-0.6)   | 4       | 0 (0-0.1)   | 4       | 0 (0-0)     |       |      |
| Low and lower middle income | 7      | 0.5 (0.2-1.2) | 9     | 0.7 (0.2-2.3) | 9     | 0.9 (0.6-1.3) | 9      | 0.5 (0.3-0.9) | 10      | 0.2 (0-0.7) | 9       | 0.1 (0-0.2) |       |      |
| Upper middle income         | ..     | ..            | 3     | 0.1 (0-0.8)   | 3     | 0.2 (0.1-0.8) | 3      | 0.3 (0.1-1)   | 9       | 0.1 (0-0.3) | 7       | 0.1 (0-0.2) |       |      |
| High income                 | ..     | ..            | 2     | 0.5 (0.1-1.4) | 2     | 0.2 (0.1-0.9) | 2      | 0.1 (0-0.6)   | 6       | 0 (0-0.1)   | 6       | 0 (0-0)     |       |      |

\* No: number of studies. Data in parentheses was the number of imputed studies.

† Rate: hospitalisation rate per 1,000 children per year.

**Supplementary table 39: Incidence rate and hospitalisation rate meta-estimates of IFV-disease by narrow age group among infants**

|                                             | 0-27 d          |                   | 1-2 m |                | 3-5 m |                   | 6-8 m |                  | 9-11 m |                     | P-value for linear trend <sup>‡</sup> |
|---------------------------------------------|-----------------|-------------------|-------|----------------|-------|-------------------|-------|------------------|--------|---------------------|---------------------------------------|
|                                             | No <sup>*</sup> | Rate <sup>†</sup> | No    | Rate           | No    | Rate              | No    | Rate             | No     | Rate                |                                       |
| <b>IFV-episodes</b>                         |                 |                   |       |                |       |                   |       |                  |        |                     |                                       |
| Developing                                  | 3               | 6.7 (0.5-79.2)    | 3     | 20.4 (5.6-71)  | 3     | 76.2 (28.9-186.1) | 2     | 130.9 (75-218.5) | 2      | 199.4 (113.9-325.4) | 0.003                                 |
| <b>IFV-ALRI</b>                             |                 |                   |       |                |       |                   |       |                  |        |                     |                                       |
| Developing                                  | 5               | 0.2 (0-129.2)     | 5     | 6.7 (1.1-40.4) | 5     | 12.8 (5.7-28.4)   | 5     | 25.3 (20-31.9)   | 5      | 30.4 (24-38.4)      | 0.02                                  |
| <b>IFV-severe ALRI</b>                      |                 |                   |       |                |       |                   |       |                  |        |                     |                                       |
| Developing                                  | 5               | 0.2 (0-129.9)     | 5     | 2.5 (0.2-30.3) | 5     | 2.1 (0.2-22.6)    | 5     | 3.3 (0.7-15)     | 5      | 6.1 (2.4-15.2)      | 0.41                                  |
| <b>Hospitalised IFV-ALRI</b>                |                 |                   |       |                |       |                   |       |                  |        |                     |                                       |
| Developing                                  | 13              | 0.9 (0.4-1.8)     | 13    | 1.7 (1-3.1)    | 13    | 1.6 (1.1-2.3)     | 13    | 1.9 (1.2-3)      | 13     | 1.9 (1.1-3.3)       | 0.15                                  |
| Industrialised <sup>§</sup>                 | 2               | 4 (0.9-18.2)      | 2     | 9 (4-20.2)     | 2     | 1.9 (0.2-21.5)    | 2     | 2.3 (0.1-35)     | 2      | 3.6 (0.6-20.7)      | 0.72                                  |
| <b>Hospitalised IFV-ALRI with hypoxemia</b> |                 |                   |       |                |       |                   |       |                  |        |                     |                                       |
| Developing                                  | 8               | 0.5 (0.2-1.2)     | 8     | 1.2 (0.7-2.3)  | 8     | 1 (0.7-1.5)       | 8     | 0.8 (0.6-1.2)    | 8      | 1 (0.6-1.7)         | 0.96                                  |
| <b>Hospitalised IFV-very severe ALRI</b>    |                 |                   |       |                |       |                   |       |                  |        |                     |                                       |
| Developing                                  | 8               | 0.4 (0.1-1.0)     | 12    | 0.3 (0.1-1.0)  | 12    | 0.4 (0.2-0.8)     | 12    | 0.3 (0.2-0.6)    | 12     | 0.4 (0.2-0.8)       | 0.72                                  |

\* No: number of studies.

† Rate: hospitalisation rate per 1,000 children per year.

‡ By outcome and development status, we included a continuous variable for age group in the mixed-effects meta-regression model. For the continuous variable, we used central values of each age group, for example, 0.5 months for 0-27 d, 2 months for 1-2 m, 4.5 months for 3-5 m, 7.5 months for 6-8 m, and 10.5 months for 9-11 m.

§ Only two studies in Finland and Israel provided population-at-risk for narrow age groups during infancy. Much higher rates were reported in the study in Israel, in which ARI and acute febrile illness was used as the case definition.

**Supplementary table 40: Information of testing in hospital ALRI cases/deaths in the studies reporting hCFRs of IFV-ALRI by three age groups - 0-5 m, 6-11 m, and 12-59 m**

| Location (Study period)             | All ALRI cases | Tested cases | Proportion of test in ALRI cases | IFV-ALRI cases | All ALRI deaths | Tested deaths | Proportion of test in ALRI deaths | IFV-ALRI deaths |
|-------------------------------------|----------------|--------------|----------------------------------|----------------|-----------------|---------------|-----------------------------------|-----------------|
| Australia; 2011-2013                | ..             | ..           | ..                               | 476            | ..              | ..            | ..                                | 0               |
| Kenya; 2010-2014                    | 1658           | 1156         | 0.7                              | 57             | 54              | 21            | 0.4                               | 1               |
| Togo; 2011-2013; 2014-2015          | 165            | 155          | 0.9                              | 20             | 4               | 2             | 0.5                               | 0               |
| South Africa; 1998-2005             | 2721           | 2602         | 1                                | 98             | 170             | 138           | 0.8                               | 4               |
| Mozambique; 2011-2014               | 422            | 411          | 1                                | 23             | 13              | 11            | 0.8                               | 1               |
| Mozambique; 2014-2016               | ..             | ..           | ..                               | 63             | ..              | ..            | ..                                | 1               |
| Kenya; 2007-2016                    | 4096           | 2994         | 0.7                              | 118            | 186             | 102           | 0.5                               | 7               |
| Vietnam; 2008-2013                  | 422            | 422          | 1                                | 45             | 0               | 0             | ..                                | 0               |
| Germany; 2010-2014                  | 2630           | 2630         | 1                                | 151            | 9               | 9             | 1                                 | 0               |
| Gambia; 2011-2013                   | 638            | 626          | 1                                | 33             | 22              | 17            | 0.8                               | 0               |
| Thailand; 2005-2011                 | 29513          | 7895         | 0.3                              | 703            | 94              | 16            | 0.2                               | 1               |
| Panama; 2012-2014                   | 4087           | 912          | 0.2                              | 59             | 31              | 5             | 0.2                               | 5               |
| Argentina; 2008-2010                | 25             | 25           | 1                                | 12             | 0               | 0             | ..                                | 0               |
| Finland; 2010-2012                  | ..             | ..           | ..                               | 28             | ..              | ..            | ..                                | 1               |
| United States of America; 2011-2015 | 12164          | ..           | ..                               | 630            | 51              | ..            | ..                                | 5               |
| South Africa; 2012-2016             | 239            | 206          | 0.9                              | 18             | 3               | 2             | 0.7                               | 1               |
| Guatemala; 2010-2016                | 2158           | 1753         | 0.8                              | 101            | 50              | 49            | 1                                 | 2               |
| Guatemala; 2010-2016                | 1788           | 1499         | 0.8                              | 50             | 57              | 56            | 1                                 | 6               |
| Spain; 2014-2017                    | 2698           | 1929         | 0.7                              | 126            | ..              | 6             | ..                                | 1               |
| Argentina; 2010-2016                | 4931           | 4666         | 0.9                              | 99             | 60              | 59            | 1                                 | 3               |
| South Africa; 2015-2017             | 9729           | 4400         | 0.5                              | 153            | 263             | 18            | 0.1                               | 0               |
| Morocco; 2010-2011                  | 789            | 789          | 1                                | 28             | 30              | 30            | 1                                 | 1               |
| Zambia; 2011-2013                   | 617            | 603          | 1                                | 31             | 117             | 108           | 0.9                               | 6               |
| South Africa; 2011-2013             | 920            | 917          | 1                                | 53             | 37              | 37            | 1                                 | 2               |
| South Africa; 2013-2015             | ..             | 606          | ..                               | 30             | ..              | 18            | ..                                | 0               |
| South Africa; 2013-2015             | ..             | 842          | ..                               | 38             | ..              | 8             | ..                                | 1               |
| South Africa; 2009-2012             | ..             | 4244         | ..                               | 235            | ..              | 36            | ..                                | 2               |

| <b>Location (Study period)</b> | <b>All ALRI cases</b> | <b>Tested cases</b> | <b>Proportion of test in ALRI cases</b> | <b>IFV-ALRI cases</b> | <b>All ALRI deaths</b> | <b>Tested deaths</b> | <b>Proportion of test in ALRI deaths</b> | <b>IFV-ALRI deaths</b> |
|--------------------------------|-----------------------|---------------------|-----------------------------------------|-----------------------|------------------------|----------------------|------------------------------------------|------------------------|
| Chile; 2012-2013               | 481                   | 464                 | 1                                       | 36                    | 2                      | 2                    | 1                                        | 1                      |
| Chile; 2012-2013               | 683                   | 679                 | 1                                       | 31                    | 3                      | 3                    | 1                                        | 0                      |

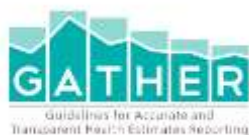

## Checklist of information that should be included in new reports of global health estimates

| Item #                                                                                                | Checklist item                                                                                                                                                                                                                                                                                                                                                                            | Reported on page #                                                                                        |
|-------------------------------------------------------------------------------------------------------|-------------------------------------------------------------------------------------------------------------------------------------------------------------------------------------------------------------------------------------------------------------------------------------------------------------------------------------------------------------------------------------------|-----------------------------------------------------------------------------------------------------------|
| <b>Objectives and funding</b>                                                                         |                                                                                                                                                                                                                                                                                                                                                                                           |                                                                                                           |
| 1                                                                                                     | Define the indicator(s), populations (including age, sex, and geographic entities), and time period(s) for which estimates were made.                                                                                                                                                                                                                                                     | 7-8                                                                                                       |
| 2                                                                                                     | List the funding sources for the work.                                                                                                                                                                                                                                                                                                                                                    | 21; summary                                                                                               |
| <b>Data Inputs</b>                                                                                    |                                                                                                                                                                                                                                                                                                                                                                                           |                                                                                                           |
| <i>For all data inputs from multiple sources that are synthesized as part of the study:</i>           |                                                                                                                                                                                                                                                                                                                                                                                           |                                                                                                           |
| 3                                                                                                     | Describe how the data were identified and how the data were accessed.                                                                                                                                                                                                                                                                                                                     | 7-9; 11                                                                                                   |
| 4                                                                                                     | Specify the inclusion and exclusion criteria. Identify all ad-hoc exclusions.                                                                                                                                                                                                                                                                                                             | 7-8                                                                                                       |
| 5                                                                                                     | Provide information on all included data sources and their main characteristics. For each data source used, report reference information or contact name/institution, population represented, data collection method, year(s) of data collection, sex and age range, diagnostic criteria or measurement method, and sample size, as relevant.                                             | Supplementary material pp 28-56 and pp 19-25                                                              |
| 6                                                                                                     | Identify and describe any categories of input data that have potentially important biases (e.g., based on characteristics listed in item 5).                                                                                                                                                                                                                                              | 15-18                                                                                                     |
| <i>For data inputs that contribute to the analysis but were not synthesized as part of the study:</i> |                                                                                                                                                                                                                                                                                                                                                                                           |                                                                                                           |
| 7                                                                                                     | Describe and give sources for any other data inputs.                                                                                                                                                                                                                                                                                                                                      | 7-9, 11; supplementary material pp 19-25                                                                  |
| <i>For all data inputs:</i>                                                                           |                                                                                                                                                                                                                                                                                                                                                                                           |                                                                                                           |
| 8                                                                                                     | Provide all data inputs in a file format from which data can be efficiently extracted (e.g., a spreadsheet rather than a PDF), including all relevant meta-data listed in item 5. For any data inputs that cannot be shared because of ethical or legal reasons, such as third-party ownership, provide a contact name or the name of the institution that retains the right to the data. | We will provide a weblink to Edinburgh Datashare which will be active for public when paper is published. |
| <b>Data analysis</b>                                                                                  |                                                                                                                                                                                                                                                                                                                                                                                           |                                                                                                           |
| 9                                                                                                     | Provide a conceptual overview of the data analysis method. A diagram may be helpful.                                                                                                                                                                                                                                                                                                      | A diagram in Figure 1; description in 9-11                                                                |
| 10                                                                                                    | Provide a detailed description of all steps of the analysis, including mathematical formulae. This description should cover, as relevant, data cleaning, data pre-processing, data adjustments and weighting of data sources, and mathematical or statistical model(s).                                                                                                                   | 9-11; supplementary material pp 19-25, 26, 27.                                                            |
| 11                                                                                                    | Describe how candidate models were evaluated and how the final model(s) were selected.                                                                                                                                                                                                                                                                                                    | 10-11                                                                                                     |
| 12                                                                                                    | Provide the results of an evaluation of model performance, if done, as well as the results of any relevant sensitivity analysis.                                                                                                                                                                                                                                                          | Sensitivity analysis in p 13-14; Supplementary material pp 11-18, 19-25.                                  |
| 13                                                                                                    | Describe methods for calculating uncertainty of the estimates. State which sources of uncertainty were, and were not, accounted for in the uncertainty analysis.                                                                                                                                                                                                                          | 10, 14                                                                                                    |
| 14                                                                                                    | State how analytic or statistical source code used to generate estimates can be accessed.                                                                                                                                                                                                                                                                                                 | We will provide a weblink which will be active for public when paper is published.                        |
| <b>Results and Discussion</b>                                                                         |                                                                                                                                                                                                                                                                                                                                                                                           |                                                                                                           |
| 15                                                                                                    | Provide published estimates in a file format from which data can be efficiently extracted.                                                                                                                                                                                                                                                                                                | We will provide a weblink to Edinburgh Datashare                                                          |

| Item #    | Checklist item                                                                                                                                           | Reported on page #                                       |
|-----------|----------------------------------------------------------------------------------------------------------------------------------------------------------|----------------------------------------------------------|
|           |                                                                                                                                                          | which will be active for public when paper is published. |
| <b>16</b> | Report a quantitative measure of the uncertainty of the estimates (e.g. uncertainty intervals).                                                          | 12-14                                                    |
| <b>17</b> | Interpret results in light of existing evidence. If updating a previous set of estimates, describe the reasons for changes in estimates.                 | 14-16                                                    |
| <b>18</b> | Discuss limitations of the estimates. Include a discussion of any modelling assumptions or data limitations that affect interpretation of the estimates. | 14, 16-18                                                |



## STROBE Statement—checklist of items that should be included in reports of observational studies

|                          | Item No | Recommendation                                                                                                                                                                                                                                                                                                                                                                                                                                                                 | Reported on page #                                                                                                   |
|--------------------------|---------|--------------------------------------------------------------------------------------------------------------------------------------------------------------------------------------------------------------------------------------------------------------------------------------------------------------------------------------------------------------------------------------------------------------------------------------------------------------------------------|----------------------------------------------------------------------------------------------------------------------|
| Title and abstract       | 1       | (a) Indicate the study's design with a commonly used term in the title or the abstract                                                                                                                                                                                                                                                                                                                                                                                         | In Title                                                                                                             |
|                          |         | (b) Provide in the abstract an informative and balanced summary of what was done and what was found                                                                                                                                                                                                                                                                                                                                                                            | In Summary                                                                                                           |
| <b>Introduction</b>      |         |                                                                                                                                                                                                                                                                                                                                                                                                                                                                                |                                                                                                                      |
| Background/rationale     | 2       | Explain the scientific background and rationale for the investigation being reported                                                                                                                                                                                                                                                                                                                                                                                           | P9                                                                                                                   |
| Objectives               | 3       | State specific objectives, including any prespecified hypotheses                                                                                                                                                                                                                                                                                                                                                                                                               | P9                                                                                                                   |
| <b>Methods</b>           |         |                                                                                                                                                                                                                                                                                                                                                                                                                                                                                |                                                                                                                      |
| Study design             | 4       | Present key elements of study design early in the paper                                                                                                                                                                                                                                                                                                                                                                                                                        | P9                                                                                                                   |
| Setting                  | 5       | Describe the setting, locations, and relevant dates, including periods of recruitment, exposure, follow-up, and data collection                                                                                                                                                                                                                                                                                                                                                | P9                                                                                                                   |
| Participants             | 6       | (a) <i>Cohort study</i> —Give the eligibility criteria, and the sources and methods of selection of participants. Describe methods of follow-up<br><br><i>Case-control study</i> —Give the eligibility criteria, and the sources and methods of case ascertainment and control selection. Give the rationale for the choice of cases and controls<br><br><i>Cross-sectional study</i> —Give the eligibility criteria, and the sources and methods of selection of participants | For meta-analysis, study selection criteria in P9, P10.                                                              |
|                          |         | (b) <i>Cohort study</i> —For matched studies, give matching criteria and number of exposed and unexposed<br><br><i>Case-control study</i> —For matched studies, give matching criteria and the number of controls per case                                                                                                                                                                                                                                                     | Not applicable                                                                                                       |
| Variables                | 7       | Clearly define all outcomes, exposures, predictors, potential confounders, and effect modifiers. Give diagnostic criteria, if applicable                                                                                                                                                                                                                                                                                                                                       | Definition in P11, P12.                                                                                              |
| Data sources/measurement | 8*      | For each variable of interest, give sources of data and details of methods of assessment (measurement). Describe comparability of assessment methods if there is more than one group                                                                                                                                                                                                                                                                                           | Data sources in P9, P11, P13.                                                                                        |
| Bias                     | 9       | Describe any efforts to address potential sources of bias                                                                                                                                                                                                                                                                                                                                                                                                                      | Inclusion of unpublished data to avoid publication bias (p11);<br><br>Subgroup and sensitivity analysis in P12, P13. |
| Study size               | 10      | Explain how the study size was arrived at                                                                                                                                                                                                                                                                                                                                                                                                                                      | Not applicable                                                                                                       |
| Quantitative variables   | 11      | Explain how quantitative variables were handled in the analyses. If applicable, describe which groupings were chosen and why                                                                                                                                                                                                                                                                                                                                                   | P11, 12, 13                                                                                                          |
| Statistical methods      | 12      | (a) Describe all statistical methods, including those used to control for confounding                                                                                                                                                                                                                                                                                                                                                                                          | P12, 13, 14                                                                                                          |
|                          |         | (b) Describe any methods used to examine subgroups and interactions                                                                                                                                                                                                                                                                                                                                                                                                            | P12                                                                                                                  |
|                          |         | (c) Explain how missing data were addressed                                                                                                                                                                                                                                                                                                                                                                                                                                    | P11, P12                                                                                                             |
|                          |         | (d) <i>Cohort study</i> —If applicable, explain how loss to follow-up was addressed                                                                                                                                                                                                                                                                                                                                                                                            |                                                                                                                      |

*Case-control study*—If applicable, explain how matching of cases and controls was addressed

*Cross-sectional study*—If applicable, describe analytical methods taking account of sampling strategy

---

(e) Describe any sensitivity analyses

P12, P13.

| <b>Results</b>           |     | <b>Reported on page#</b>                                                                                                                                                                                     |                           |
|--------------------------|-----|--------------------------------------------------------------------------------------------------------------------------------------------------------------------------------------------------------------|---------------------------|
| Participants             | 13* | (a) Report numbers of individuals at each stage of study—eg numbers potentially eligible, examined for eligibility, confirmed eligible, included in the study, completing follow-up, and analysed            | Figure 1; P14             |
|                          |     | (b) Give reasons for non-participation at each stage                                                                                                                                                         | Figure 1                  |
|                          |     | (c) Consider use of a flow diagram                                                                                                                                                                           | Figure 1                  |
| Descriptive data         | 14* | (a) Give characteristics of study participants (eg demographic, clinical, social) and information on exposures and potential confounders                                                                     | Appendix (PP30-59)        |
|                          |     | (b) Indicate number of participants with missing data for each variable of interest                                                                                                                          | Appendix (PP30-59)        |
|                          |     | (c) <i>Cohort study</i> —Summarise follow-up time (eg, average and total amount)                                                                                                                             | Appendix (PP30-59)        |
| Outcome data             | 15* | <i>Cohort study</i> —Report numbers of outcome events or summary measures over time                                                                                                                          | Appendix (PP7-8)          |
|                          |     | <i>Case-control study</i> —Report numbers in each exposure category, or summary measures of exposure                                                                                                         | Not applicable            |
|                          |     | <i>Cross-sectional study</i> —Report numbers of outcome events or summary measures                                                                                                                           | Appendix (PP7-8)          |
| Main results             | 16  | (a) Give unadjusted estimates and, if applicable, confounder-adjusted estimates and their precision (eg, 95% confidence interval). Make clear which confounders were adjusted for and why they were included | PP14-16; P12              |
|                          |     | (b) Report category boundaries when continuous variables were categorized                                                                                                                                    | P12                       |
|                          |     | (c) If relevant, consider translating estimates of relative risk into absolute risk for a meaningful time period                                                                                             | Not applicable            |
| Other analyses           | 17  | Report other analyses done—eg analyses of subgroups and interactions, and sensitivity analyses                                                                                                               | PP15-16; Appendix PP11-24 |
| <b>Discussion</b>        |     |                                                                                                                                                                                                              |                           |
| Key results              | 18  | Summarise key results with reference to study objectives                                                                                                                                                     | P16                       |
| Limitations              | 19  | Discuss limitations of the study, taking into account sources of potential bias or imprecision. Discuss both direction and magnitude of any potential bias                                                   | PP17-20                   |
| Interpretation           | 20  | Give a cautious overall interpretation of results considering objectives, limitations, multiplicity of analyses, results from similar studies, and other relevant evidence                                   | P19, PP20-21              |
| Generalisability         | 21  | Discuss the generalisability (external validity) of the study results                                                                                                                                        | P18; PP20-21              |
| <b>Other information</b> |     |                                                                                                                                                                                                              |                           |
| Funding                  | 22  | Give the source of funding and the role of the funders for the present study and, if applicable, for the original study on which the present article is based                                                | P23; Summary              |

\*Give information separately for cases and controls in case-control studies and, if applicable, for exposed and unexposed groups in cohort and cross-sectional studies.

**Note:** An Explanation and Elaboration article discusses each checklist item and gives methodological background and published examples of transparent reporting. The STROBE checklist is best used in conjunction with this article (freely available on the Web sites of PLoS Medicine at <http://www.plosmedicine.org/>, Annals of Internal Medicine at <http://www.annals.org/>, and Epidemiology at <http://www.epidem.com/>). Information on the STROBE Initiative is available at [www.strobe-statement.org](http://www.strobe-statement.org).

## References

1. International Vaccine Access Center (IVAC), Johns Hopkins Bloomberg School of Public Health. VIEW-hub. [www.view-hub.org](http://www.view-hub.org) (accessed 5 June 2018).
2. UNAIDS. Global Plan towards the Elimination of New HIV Infections among Children by 2015 and Keeping Their Mothers Alive. Geneva: UNAIDS, 2011.
3. Nguenha N, Tivane A, Pale M, et al. Clinical and epidemiological characterization of influenza virus infections in children with severe acute respiratory infection in Maputo, Mozambique: Results from the implementation of sentinel surveillance, 2014 - 2016. *PLoS One* 2018; **13**(3): e0194138.
4. Liu L, Oza S, Hogan D, et al. Global, regional, and national causes of under-5 mortality in 2000–15: an updated systematic analysis with implications for the Sustainable Development Goals. *The Lancet* 2016; **388**(10063): 3027-35.
5. McAllister DA, Liu L, Shi T, et al. Global, regional, and national estimates of pneumonia morbidity and mortality in children younger than 5 years between 2000 and 2015: a systematic analysis. *The Lancet Global Health* 2018.
6. WHO. Life tables by WHO region. July, 2017 2017 (accessed Sep 12 2017).
7. Sterne JA, White IR, Carlin JB, et al. Multiple imputation for missing data in epidemiological and clinical research: potential and pitfalls. *Bmj* 2009; **338**: b2393.
8. Rubin DB. Multiple imputation for nonresponse in surveys. New York: Wiley; 1987.
9. Honaker J, King G, Blackwell M. Amelia II: A Program for Missing Data. 2011 2011; **45**(7): 47.
10. Nair H, Brooks WA, Katz M, et al. Global burden of respiratory infections due to seasonal influenza in young children: a systematic review and meta-analysis. *The Lancet* 2011; **378**(9807): 1917-30.
11. Tapia MD, Sow SO, Tamboura B, et al. Maternal immunisation with trivalent inactivated influenza vaccine for prevention of influenza in infants in Mali: a prospective, active-controlled, observer-blind, randomised phase 4 trial. *The Lancet Infectious diseases* 2016; **16**(9): 1026-35.
12. Fowlkes A, Steffens A, Temte J, et al. Incidence of medically attended influenza during pandemic and post-pandemic seasons through the Influenza Incidence Surveillance Project, 2009-13. *The Lancet Respiratory medicine* 2015; **3**(9): 709-18.
13. Heikkinen T, Silvennoinen H, Peltola V, et al. Burden of Influenza in Children in the Community. *The Journal of Infectious Diseases* 2004; **190**(8): 1369-73.
14. Diene Sarr F, Niang M, Thiam D, et al. Acute Febrile Illness and Influenza Disease Burden in a Rural Cohort Dedicated to Malaria in Senegal, 2012–2013. *PLOS ONE* 2015; **10**(12): e0143999.
15. Neuzil KM, Zhu Y, Griffin MR, et al. Burden of inter-pandemic influenza in children younger than 5 years: a 25-year prospective study. *J Infect Dis* 2002; **185**(2): 147-52.
16. Broor S, Parveen S, Bharaj P, et al. A prospective three-year cohort study of the epidemiology and virology of acute respiratory infections of children in rural India. *PLoS One* 2007; **2**(6): e491.
17. Brooks WA, Goswami D, Rahman M, et al. Influenza is a major contributor to childhood pneumonia in a tropical developing country. *Pediatr Infect Dis J* 2010; **29**(3): 216-21.
18. Horby P, Mai LQ, Fox A, et al. The Epidemiology of Inter-pandemic and Pandemic Influenza in Vietnam, 2007-2010 The Ha Nam Household Cohort Study I. *American Journal of Epidemiology* 2012; **175**(10): 1062-74.
19. Inamasu T, Sudo K, Kato S, et al. Pandemic Influenza Virus Surveillance, Izu-Oshima Island, Japan. *Emerging Infectious Diseases* 2012; **18**(11): 1882-5.
20. Kimura Y, Saito R, Tsujimoto Y, et al. Geodemographics profiling of influenza A and B virus infections in community neighborhoods in Japan. *BMC Infectious Diseases* 2011; **11**(1): 36.
21. Regamey N, Kaiser L, Roiha HL, et al. Viral etiology of acute respiratory infections with cough in infancy: a community-based birth cohort study. *Pediatr Infect Dis J* 2008; **27**(2): 100-5.
22. Kumar P, Medigeshi GR, Mishra VS, et al. Etiology of Acute Respiratory Infections in Infants: A Prospective Birth Cohort Study. *Pediatric Infectious Disease Journal* 2017; **36**(1): 25-30.

23. Teros-Jaakkola T, Toivonen L, Schuez-Havupalo L, et al. Influenza virus infections from 0 to 2 years of age: A birth cohort study. *Journal of Microbiology, Immunology and Infection* 2017.
24. Buck PO, Smith DM, Shenolikar R, Irwin DE. A Retrospective Cohort Study of the Incidence, Health Care Resource Utilization and Costs of International Classification of Diseases, Clinical Modification, 9th Revision Diagnosed Influenza and Related Complications in US Children. *Pediatric Infectious Disease Journal* 2017; **36**(12): 1129-40.
25. Li-Kim-Moy JP, Yin JK, Heron L, et al. Influenza vaccine efficacy in young children attending childcare: A randomised controlled trial. *Journal of Paediatrics & Child Health* 2017; **53**(1): 47-54.
26. Steinhoff MC, Katz J, Englund JA, et al. Year-round influenza immunisation during pregnancy in Nepal: a phase 4, randomised, placebo-controlled trial. *The Lancet Infectious Diseases* 2017; **17**(9): 981-9.
27. Sarna M, Lambert SB, Sloots TP, et al. Viruses causing lower respiratory symptoms in young children: findings from the ORChID birth cohort. *Thorax* 2018; **73**(10): 969-79.
28. Gefenaite G, Pistol A, Popescu R, et al. Estimating burden of influenza-associated influenza-like illness and severe acute respiratory infection at public healthcare facilities in Romania during the 2011/12-2015/16 influenza seasons. *Influenza Other Respir Viruses* 2018; **12**(1): 183-92.
29. Katz J, Englund JA, Steinhoff MC, et al. Impact of Timing of Influenza Vaccination in Pregnancy on Transplacental Antibody Transfer, Influenza Incidence, and Birth Outcomes: A Randomized Trial in Rural Nepal. *Clinical infectious diseases : an official publication of the Infectious Diseases Society of America* 2018; **67**(3): 334-40.
30. Oliva J, Delgado-Sanz C, Larrauri A. Estimating the burden of seasonal influenza in Spain from surveillance of mild and severe influenza disease, 2010-2016. *Influenza Other Respir Viruses* 2018; **12**(1): 161-70.
31. Forster J, Ihorst G, Rieger CHL, et al. Prospective population-based study of viral lower respiratory tract infections in children under 3 years of age (the PRI.DE study). *European Journal of Pediatrics* 2004; **163**(12): 709-16.
32. Hasan R, Rhodes J, Thamthitiwat S, et al. Incidence and etiology of acute lower respiratory tract infections in hospitalized children younger than 5 years in rural Thailand. *Pediatr Infect Dis J* 2014; **33**(2): e45-52.
33. Tallo VL, Kamigaki T, Tan AG, et al. Estimating influenza outpatients' and inpatients' incidences from 2009 to 2011 in a tropical urban setting in the Philippines. *Influenza & Other Respiratory Viruses* 2014; **8**(2): 159-68.
34. Yu H, Huang J, Huai Y, et al. The substantial hospitalization burden of influenza in central China: surveillance for severe, acute respiratory infection, and influenza viruses, 2010-2012. *Influenza & Other Respiratory Viruses* 2014; **8**(1): 53-65.
35. Chaves SS, Perez A, Farley MM, et al. The burden of influenza hospitalizations in infants from 2003 to 2012, United States. *Pediatric Infectious Disease Journal* 2014; **33**(9): 912-9.
36. Chiu SS, Lo JY, Chan K-H, et al. Population-based hospitalization burden of influenza A virus subtypes and antigenic drift variants in children in Hong Kong (2004–2011). *PloS one* 2014; **9**(4): e92914.
37. Nelson EAS, Ip M, Tam JS, et al. Burden of influenza infection in hospitalised children below 6 months of age and above in Hong Kong from 2005 to 2011. *Vaccine* 2014; **32**(49): 6692-8.
38. Dawood FS, Fiore A, Kamimoto L, et al. Burden of seasonal influenza hospitalization in children, United States, 2003 to 2008. *J Pediatr* 2010; **157**(5): 808-14.
39. Weigl JA, Puppe W, Belke O, Neuss J, Bagci F, Schmitt HJ. The descriptive epidemiology of severe lower respiratory tract infections in children in Kiel, Germany. *Klinische Padiatrie* 2005; **217**(5): 259-67.
40. Montes M, Vicente D, Perez-Yarza EG, Cilla G, Perez-Trallero E. Influenza-related hospitalisations among children aged less than 5 years old in the Basque Country, Spain: a 3-year study (July 2001-June 2004). *Vaccine* 2005; **23**(34): 4302-6.

41. Ajayi-Obe EK, Coen PG, Handa R, et al. Influenza A and respiratory syncytial virus hospital burden in young children in East London. *Epidemiology and Infection* 2008; **136**(8): 1046-58.
42. Nicholson KG, McNally T, Silverman M, Simons P, Stockton JD, Zambon MC. Rates of hospitalisation for influenza, respiratory syncytial virus and human metapneumovirus among infants and young children. *Vaccine* 2006; **24**(1): 102-8.
43. Yoshida LM, Suzuki M, Yamamoto T, et al. Viral pathogens associated with acute respiratory infections in central vietnamese children. *Pediatr Infect Dis J* 2010; **29**(1): 75-7.
44. Nelson EA, Tam JS, Yu LM, Li AM, Chan PK, Sung RY. Assessing disease burden of respiratory disorders in Hong Kong children with hospital discharge data and linked laboratory data. *Hong Kong medical journal = Xianggang yi xue za zhi* 2007; **13**(2): 114-21.
45. Chiu SS, Chan KH, Chen H, et al. Virologically confirmed population-based burden of hospitalization caused by influenza A and B among children in Hong Kong. *Clinical Infectious Diseases : an official publication of the Infectious Diseases Society of America* 2009; **49**(7): 1016-21.
46. Ji W, Zhang T, Zhang X, et al. The epidemiology of hospitalized influenza in children, a two year population-based study in the People's Republic of China. *BMC health services research* 2010; **10**: 82.
47. Poehling KA, Edwards KM, Weinberg GA, et al. The Underrecognized Burden of Influenza in Young Children. *New England Journal of Medicine* 2006; **355**(1): 31-40.
48. Iwane MK, Edwards KM, Szilagyi PG, et al. Population-based surveillance for hospitalizations associated with respiratory syncytial virus, influenza virus, and parainfluenza viruses among young children. *Pediatrics* 2004; **113**(6): 1758-64.
49. Ampofo K, Gesteland PH, Bender J, et al. Epidemiology, complications, and cost of hospitalization in children with laboratory-confirmed influenza infection. *Pediatrics* 2006; **118**(6): 2409-17.
50. Coffin SE, Zaoutis TE, Rosenquist ABW, et al. Incidence, complications, and risk factors for prolonged stay in children hospitalized with community-acquired influenza. *Pediatrics* 2007; **119**(4): 740-8.
51. Grijalva CG, Craig AS, Dupont WD, et al. Estimating Influenza Hospitalizations among Children. *Emerging Infectious Diseases* 2006; **12**(1): 103-9.
52. Kamigaki T, Aldey PP, Mercado ES, et al. Estimates of influenza and respiratory syncytial virus incidences with fraction modeling approach in Baguio City, the Philippines, 2012-2014. *Influenza and other Respiratory Viruses* 2017; **11**(4): 311-8.
53. Li-Kim-Moy J, Yin JK, Patel C, et al. 2016 Australian vaccine preventable disease epidemiological review series: Influenza 2006 to 2015. *Communicable Diseases Intelligence Quarterly Report* 2016; **40**(4): E482-E95.
54. Jain S, Williams DJ, Arnold SR, et al. Community-acquired pneumonia requiring hospitalization among US children. *New England Journal of Medicine* 2015; **372**(9): 835-45.
55. Sakkou Z, Stripeli F, Papadopoulos NG, et al. Impact of influenza infection on children's hospital admissions during two seasons in Athens, Greece. *Vaccine* 2011; **29**(6): 1167-72.
56. Silvennoinen H, Peltola V, Vainionpaa R, Ruuskanen O, Heikkinen T. Incidence of influenza-related hospitalizations in different age groups of children in Finland: A 16-year study. *Pediatric Infectious Disease Journal* 2011; **30**(2): e24-e8.
57. Yousey-Hindes KM, Hadler JL. Neighborhood socioeconomic status and influenza hospitalizations among children: New Haven County, Connecticut, 2003-2010. *American journal of public health* 2011; **101**(9): 1785-9.
58. Homaira N, Luby SP, Hossain K, et al. Respiratory viruses associated hospitalization among children aged <5 years in Bangladesh: 2010-2014. *PLoS ONE* 2016; **11**(2): e0147982.
59. Al-Awaidy S, Hamid S, Al Obaidani I, et al. The Burden of Influenza-Associated Hospitalizations in Oman, January 2008-June 2013. *PLOS ONE* 2015; **10**(12): e0144186.
60. Descalzo MA, Clara W, Guzmán G, et al. Estimating the burden of influenza-associated hospitalizations and deaths in Central America. *Influenza and other respiratory viruses* 2016; **10**(4): 340-5.

61. Rojo JC, Ruiz-Contreras J, Fernández MB, Marín MA, Folgosa L. Influenza-Related Hospitalizations in Children Younger Than Three Years of Age. *The Pediatric Infectious Disease Journal* 2006; **25**(7): 596-601.
62. D'Onise K, Raupach JC. The burden of influenza in healthy children in South Australia. *The Medical Journal of Australia* 2008; **188**(9): 510-3.
63. Henrickson KJ, Hoover S, Kehl KS, Hua W. National disease burden of respiratory viruses detected in children by polymerase chain reaction. *Pediatr Infect Dis J* 2004; **23**(1 Suppl): S11-8.
64. Suttmoller F, Ferro ZP, Asensi MD, Ferreira V, Mazzei IS, Cunha BL. Etiology of acute respiratory tract infections among children in a combined community and hospital study in Rio de Janeiro. *Clinical infectious diseases : an official publication of the Infectious Diseases Society of America* 1995; **20**(4): 854-60.
65. Ntiri MP, Duque J, McMorrow ML, et al. 2016 Incidence of medically attended influenza among residents of Shai-Osudoku and Ningo-Prampram Districts, Ghana, May 2013 - April 2015. *BMC Infectious Diseases* 2016; **16**(1): 757.
66. Boddington NL, Verlander NQ, Pebody RG. Developing a system to estimate the severity of influenza infection in England: findings from a hospital-based surveillance system between 2010/2011 and 2014/2015. *Epidemiology & Infection* 2017; **145**(7): 1461-70.
67. Von Der Beck D, Seeger W, Herold S, Gunther A, Loh B. Characteristics and outcomes of a cohort hospitalized for pandemic and seasonal influenza in Germany based on nationwide inpatient data. *PLoS ONE* 2017; **12**(7): e0180920.
68. Poehling KA, Edwards KM, Griffin MR, et al. The burden of influenza in young children, 2004-2009. *Pediatrics* 2013; **131**(2): 207-16.
69. Harvala H, Smith D, Salvatierra K, et al. Burden of influenza B virus infections in Scotland in 2012/13 and epidemiological investigations between 2000 and 2012. *Euro Surveillance: Bulletin European sur les Maladies Transmissibles = European Communicable Disease Bulletin* 2014; **19**(37).
70. Olabarrieta I, Gonzalez-Carrasco E, Calvo C, Pozo F, Casas I, Garcia-Garcia ML. Hospital admission due to respiratory viral infections in moderate preterm, late preterm and term infants during their first year of life. *Allergologia et Immunopathologia* 2015; **43**(5): 469-73.
71. Chaves SS, Aragon D, Bennett N, et al. Patients hospitalized with laboratory-confirmed influenza during the 2010-2011 influenza season: Exploring disease severity by virus type and subtype. *Journal of Infectious Diseases* 2013; **208**(8): 1305-14.
72. Babakazo P, Lubula L, Disasuani W, et al. The national and provincial burden of medically attended influenza-associated influenza-like illness and severe acute respiratory illness in the Democratic Republic of Congo, 2013-2015. *Influenza Other Respir Viruses* 2018; **12**(6): 695-705.
73. Ieng V, Tolosa MX, Tek B, et al. National burden of influenza-associated hospitalizations in Cambodia, 2015 and 2016. *WESTERN PACIFIC SURVEILLANCE AND RESPONSE* 2018; **9**.
74. Nyamusore J, Rukelibuga J, Mutagoma M, et al. The national burden of influenza-associated severe acute respiratory illness hospitalization in Rwanda, 2012-2014. *Influenza and Other Respiratory Viruses* 2018; **12**(1): 38-45.
75. Sotomayor V, Fasce RA, Vergara N, De la Fuente F, Loayza S, Palekar R. Estimating the burden of influenza-associated hospitalizations and deaths in Chile during 2012-2014. *Influenza Other Respir Viruses* 2018; **12**(1): 138-45.
76. Susilarini NK, Haryanto E, Praptiningsih CY, et al. Estimated incidence of influenza-associated severe acute respiratory infections in Indonesia, 2013-2016. *Influenza Other Respir Viruses* 2018; **12**(1): 81-7.
77. Yi Z, David JM, Quanyi W, et al. Hospitalizations for Influenza-Associated Severe Acute Respiratory Infection, Beijing, China, 2014-2016. *Emerging Infectious Disease Journal* 2018; **24**(11): 2098.
78. 赵小娟, 张奕, 杨剑, 田兴军, 王保东 李. 怀柔区流感住院病例特征及其住院率估计. *国际病毒学杂志* 2018; **25**(4): 281.
79. Abdel-Hady DM, Al Balushi RM, Al Abri BA, et al. Estimating the burden of influenza-associated hospitalization and deaths in Oman (2012-2015). *Influenza Other Respir Viruses* 2018; **12**(1): 146-52.

80. Bonmarin I, Belchior E, Bergounioux J, et al. Intensive care unit surveillance of influenza infection in France: the 2009/10 pandemic and the three subsequent seasons. *Euro Surveill: Bulletin Europeen sur les Maladies Transmissibles = European Communicable Disease Bulletin* 2015; **20**(46).
81. Kaczmarek MC, Ware RS, Coulthard MG, McEniery J, Lambert SB. Epidemiology of Australian Influenza-Related Paediatric Intensive Care Unit Admissions, 1997-2013. *Plos One* 2016; **11**(3).
82. Gubbels S, Krause TG, Bragstad K, Perner A, Molbak K, Glismann S. Burden and characteristics of influenza A and B in Danish intensive care units during the 2009/10 and 2010/11 influenza seasons. *Epidemiology & Infection* 2013; **141**(4): 767-75.
83. Chuang JH, Huang AS, Huang WT, et al. Nationwide surveillance of influenza during the pandemic (2009-10) and post-pandemic (2010-11) periods in Taiwan. *PLoS ONE* 2012; **7**(4): e36120.
84. Kwong KL, Lung D, Wong SN, Que TL, Kwong NS. Influenza-related hospitalisations in children. *Journal of paediatrics and child health* 2009; **45**(11): 660-4.
85. Moore DL, Vaudry W, Scheifele DW, et al. Surveillance for influenza admissions among children hospitalized in Canadian immunization monitoring program active centers, 2003-2004. *Pediatrics* 2006; **118**(3): e610-9.
86. Coelho MC, Tsuchiya LR, Nogueira MB, et al. Impact of respiratory infections by influenza viruses A and B in pediatrics patients from Federal University of Parana, Brazil. *The Brazilian journal of infectious diseases : an official publication of the Brazilian Society of Infectious Diseases* 2007; **11**(2): 220-3.
87. Sam IC, Abdul-Murad A, Karunakaran R, et al. Clinical features of Malaysian children hospitalized with community-acquired seasonal influenza. *International journal of infectious diseases : IJID : official publication of the International Society for Infectious Diseases* 2010; **14** (Suppl 3): e36-40.
88. Bashir U, Nisar N, Arshad Y, et al. Respiratory syncytial virus and influenza are the key viral pathogens in children <2 years hospitalized with bronchiolitis and pneumonia in Islamabad Pakistan. *Archives of Virology* 2017; **162**(3): 763-73.
89. Kanik A, Eliacik K, Koyun B, et al. 2016 Viral Etiology of Acute Bronchiolitis in Hospitalized Infants and the Effect on Clinical Course. *Journal of Pediatric Infection* 2016; **10**(3): 93-8.
90. Li-Kim-Moy J, Yin JK, Blyth CC, et al. Influenza hospitalizations in Australian children. *Epidemiology & Infection* 2017; **145**(7): 1451-60.
91. Acar M, Sutcu M, Akturk H, et al. Clinical differences of influenza subspecies among hospitalized children. [Turkish]. *Turk Pediatri Arsivi* 2017; **52**(1): 15-22.
92. Horton KC, Dueger EL, Kandeel A, et al. Viral etiology, seasonality and severity of hospitalized patients with severe acute respiratory infections in the Eastern Mediterranean Region, 2007-2014. *PloS one* 2017; **12**(7): e0180954-e.
93. Dananche C, Sanchez Picot V, Benet T, et al. Burden of Influenza in Less Than 5-Year-Old Children Admitted to Hospital with Pneumonia in Developing and Emerging Countries: A Descriptive, Multicenter Study. *The American journal of tropical medicine and hygiene* 2018; **98**(6): 1805-10.
94. Draganescu A, Sandulescu O, Florea D, et al. The influenza season 2016/17 in Bucharest, Romania - surveillance data and clinical characteristics of patients with influenza-like illness admitted to a tertiary infectious diseases hospital. *The Brazilian journal of infectious diseases : an official publication of the Brazilian Society of Infectious Diseases* 2018; **22**(5): 377-86.
95. El Omeiri N, Azziz-Baumgartner E, Thompson MG, et al. Seasonal influenza vaccine effectiveness against laboratory-confirmed influenza hospitalizations - Latin America, 2013. *Vaccine* 2018; **36**(24): 3555-66.
96. Machabishvili A, Chakhunashvili G, Zakhshvili K, et al. Overview of three influenza seasons in Georgia, 2014–2017. *PLOS ONE* 2018; **13**(7): e0201207.
97. Torner N, Martínez A, Basile L, et al. Descriptive study of severe hospitalized cases of laboratory-confirmed influenza during five epidemic seasons (2010–2015). *BMC Research Notes* 2018; **11**(1): 244.
98. 张锐沐. 住院儿童流感后肺炎 152 例临床特征分析 [硕士]: 汕头大学; 2016.



99.朱芮,甘雨茹,盛鄂湘,赵东赤.武汉市某医院 2016-2017 年流行性感冒流行病学与临床特征分析. *武汉大学学报(医学版)* 2018; **39**(4).
